# Supplementary material for: Construction of chiral γ-lactam scaffolds via asymmetric cascade [3 + 2] annulation of N-alkoxyacrylamides catalyzed by a chiral-at-metal rhodium complex
Source: Royal Society of Chemistry journal article supplement (doi:10.1039/d5qo00276a), 2025-01-01
Supplement: d5qo00276a1.pdf [file d5qo00276a1.pdf]

## Supporting Information

### **Construction of chiral $\gamma$ -lactam scaffolds *via* asymmetric cascade [3+2] annulation of *N*-alkoxyacrylamides catalyzed by a chiral-at-metal rhodium complex**

Wan-Shun Cheng<sup>†, a</sup> Yong-Bing Ke<sup>†, a</sup> Yang Chen,<sup>a</sup> Hui-Ting Cui,<sup>a</sup> Rui-Qiu Zhang,<sup>a</sup>  
He-Lin Lu,<sup>a</sup> Ping Xue,<sup>a</sup> Xiao-Bo Wang,<sup>a</sup> Shi-Wu Li<sup>\*b</sup> and Jun Gong<sup>\*a</sup>

<sup>a</sup> School of Pharmacy, Hubei University of Science and Technology, Xianning, Hubei 437100, P. R. China. E-mail: gongjun@hbust.edu.cn.

<sup>b</sup> Key Laboratory for Green Processing of Chemical Engineering of Xinjiang Bingtuan, School of Chemistry and Chemical Engineering, Shihezi University, Xinjiang Uygur Autonomous Region 832000, P. R. China. E-mail: lishiwu@shzu.edu.cn

<sup>†</sup> These authors contributed equally to this work.

## Contents

|                                                                              |           |
|------------------------------------------------------------------------------|-----------|
| <b>1. General Information</b>                                                | <b>3</b>  |
| <b>2. Synthesis of Catalysts</b>                                             | <b>4</b>  |
| <b>3. Synthesis of Substrates</b>                                            | <b>4</b>  |
| <b>4. Asymmetric [3+2] Annulation Reactions</b>                              | <b>5</b>  |
| <b>5. Synthetic Transformation</b>                                           | <b>26</b> |
| <b>6. <math>^1\text{H}</math> and <math>^{13}\text{C}</math> NMR Spectra</b> | <b>27</b> |
| <b>7. HPLC Traces on Chiral Stationary Phase</b>                             | <b>57</b> |
| <b>8. Single Crystal X-Ray Diffraction Studies</b>                           | <b>85</b> |
| <b>9. References</b>                                                         | <b>87</b> |

## 1. General Information

All non-aqueous reactions were performed in oven-dried glassware and standard Schlenk tubes under an atmosphere of argon. Dichloromethane (DCM) and 1,2-dichloroethane (DCE) were distilled from  $\text{CaH}_2$  under inert atmosphere. Tetrahydrofuran (THF) and toluene were distilled from sodium and benzophenone under inert atmosphere. All other solvents and reagents were used as received unless otherwise noted. Thin layer chromatography was performed using silica gel 60 F-254 precoated plates (0.2~0.3 mm) and visualized by short-wave UV (254 nm) irradiation, potassium permanganate, or iodine stain. Column chromatography was performed with silica gel (200-300 mesh, Yantai Jiangyou Silica Gel Development Co., Ltd). The  $^1\text{H}$ ,  $^{13}\text{C}$  and  $^{19}\text{F}$  NMR spectra were obtained in  $\text{CDCl}_3$  using a Bruker-BioSpin AVANCE III HD 400 NMR spectrometer, respectively. Chemical shifts ( $\delta$ ) for  $^1\text{H}$  NMR spectra are recorded in parts per million from tetramethylsilane with the solvent resonance as the internal standard (chloroform,  $\delta$  7.26 ppm). Data are reported as follows: chemical shift, multiplicity (s = singlet, d = doublet, t = triplet, q = quartet, qn = quintet, m = multiplet and br = broad), coupling constant in Hz, and integration. Chemical shifts for  $^{13}\text{C}$  NMR spectra are recorded in parts per million from tetramethylsilane using the central peak of deuteriochloroform ( $\delta$  77.00 ppm) as the internal standard. Optical rotation was recorded on INESA SGW-1 polarimeter at concentrations of 0.5 g/100 mL or 1.0 g/100 mL. Enantiomeric excess was determined by HPLC analysis on Chiralpak column (Daicel Chemical Industries, LTD) on Shimadzu Essentia LC-16. High-resolution mass spectra were recorded on a Bruker Impact II UHR TOF LC/MS Mass Spectrometry.

## 2. Synthesis of Catalysts

| catalyst      | M  | X | R               |
|---------------|----|---|-----------------|
| $\Delta$ -Rh1 | Rh | O | Ar <sub>1</sub> |
| $\Delta$ -Rh2 | Rh | O | Ar <sub>2</sub> |
| $\Delta$ -Rh3 | Rh | O | H               |
| $\Delta$ -RhS | Rh | S | H               |
| $\Delta$ -IrO | Ir | O | H               |

  

Ar<sub>1</sub> =

Ar<sub>2</sub> =

**catalyst**

Racemic rhodium catalyst *rac*-Rh3 and chiral catalyst  $\Delta$ -Rh3 were prepared according to reported procedures developed by Meggers' group.<sup>[1]</sup>  $\Delta$ -Rh1<sup>[2]</sup>,  $\Delta$ -Rh2<sup>[3]</sup>  $\Delta$ -RhS<sup>[4]</sup> and  $\Delta$ -IrO<sup>[5]</sup> were synthesized according to published procedures.

## 3. Synthesis of Substrates

### 3.1 Synthesis of $\alpha,\beta$ -unsaturated 2-acylimidazoles

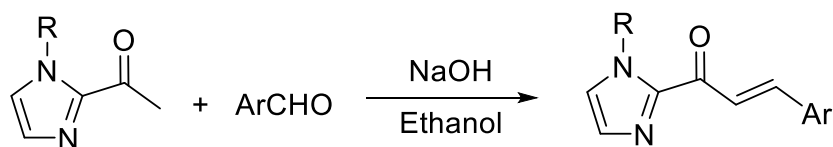

$\alpha,\beta$ -unsaturated 2-acylimidazoles **1** were prepared by *Aldol* reaction according to a reported procedure.<sup>[3]</sup> 2-acetyl-imidazole (10.0 mmol, 1.0 eq.) and ethanol (50 mL) were added to a 100 mL round-bottom flask followed by the aromatic aldehyde (12 mmol, 1.2 eq.) and NaOH (5 mmol, 0.5 eq.). The solution was stirred at room temperature until the substrates consumption (detected by TLC). The reaction mixture was then quenched with saturated aqueous NH<sub>4</sub>Cl and the mixture was extracted with EtOAc (3  $\times$  30 mL). The combined organic layer was washed with 50 mL brine and dried over anhydrous Na<sub>2</sub>SO<sub>4</sub>, filtered and concentrated under vacuum. The residue was purified by a flash column chromatography on silica gel to afford the desired product **1**.

**1p** was prepared according to published procedures.<sup>[5]</sup>

### 3.2 Synthesis of *N*-alkoxyacrylamides **2**

The *N*-alkoxyacrylamides **2** were prepared according to a reported method.<sup>[6]</sup>

## 4. Asymmetric [3+2] Annulation Reactions

### 4.1 Synthesis of racemic products as HPLC references

**General Procedure:** A dried 25 mL Schlenk tube was charged with  $\alpha,\beta$ -unsaturated 2-acylimidazoles **1** (0.20 mmol), *N*-alkoxyacrylamides **2** (0.24 mmol) and racemic catalyst *rac*-**Rh3** (3.3 mg, 2.0 mol%). The tube was purged with argon, then dry MeCN (1.0 mL) and triethylamine (0.04 mmol) were added successively. The reaction mixture was stirred at 30°C for 12~48 hours (monitored by TLC) under argon. After the reaction was completed, the solvent was removed under reduced pressure and the mixture was purified by flash column chromatography on silica gel (petroleum ether/ EtOAc = 6:1 to 3:1) to afford racemic products as HPLC reference for determination of enantiomeric excess.

### 4.2 Substrate Scope

**General Procedure:** A dried 25 mL Schlenk tube was charged with  $\alpha,\beta$ -unsaturated 2-acylimidazoles **1** (0.20 mmol), *N*-alkoxyacrylamides **2** (0.24 mmol) and chiral catalyst  **$\Delta$ -Rh3** (3.3 mg, 2.0 mol%). The tube was purged with argon, then dry MeCN (1.0 mL) and triethylamine (5.6  $\mu$ L, 0.04 mmol) were added successively. The reaction mixture was stirred at 30°C for 12~48 hours (monitored by TLC) under argon. After the reaction was completed, the solvent was removed under reduced pressure and the mixture was purified by flash column chromatography on silica gel (petroleum ether/ EtOAc = 6:1 to 3:1) to afford chiral products.

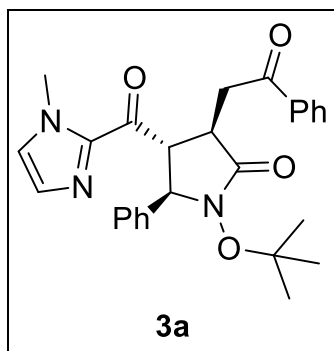

According to the general procedure, **3a** was obtained as white solid (87.3 mg, 95% yield), m.p. 150.2–152.2°C.

Enantiomeric excess was determined by HPLC analysis, ee = 97%, Chiralpak column ADH,  $\lambda$ =254 nm, *n*-hexane/*i*-PrOH=70:30, flow rate: 0.8 mL/min, 25°C,  $t_r$ (minor)=10.308 min,  $t_r$ (major)=15.971 min.

$[\alpha]_D^{20} = +86.4^\circ$  (c=0.5, CH<sub>2</sub>Cl<sub>2</sub>).

**<sup>1</sup>H NMR** (400 MHz, CDCl<sub>3</sub>)  $\delta$  7.77 (dd,  $J$  = 8.4, 1.3 Hz, 2H), 7.53 – 7.48 (m, 1H), 7.41 – 7.32 (m, 6H), 7.30 – 7.27 (m, 1H), 6.97 (d,  $J$  = 1.0 Hz, 1H), 6.83 (d,  $J$  = 1.0 Hz, 1H), 5.22 (d,  $J$  = 6.0 Hz, 1H), 4.37 (dd,  $J$  = 7.6, 5.9 Hz, 1H), 4.06 (s, 3H), 3.76 – 3.67 (m, 1H), 3.48 (ddd,  $J$  = 9.4, 7.6, 3.0 Hz, 1H), 3.32 (dd,  $J$  = 18.1, 9.4 Hz, 1H), 1.21 (s, 9H).

**<sup>13</sup>C NMR** (101 MHz, CDCl<sub>3</sub>)  $\delta$  197.49, 189.63, 173.13, 142.76, 139.05, 136.48, 133.03, 129.46, 128.65, 128.40, 128.17, 127.95, 127.68, 127.65, 84.54, 64.94, 53.60, 39.91, 38.02, 36.17, 27.63.

**HRMS** (ESI) calcd for C<sub>27</sub>H<sub>30</sub>N<sub>3</sub>O<sub>4</sub> [M+H]<sup>+</sup> : 460.2216; found: 460.2218.

In the scale-up synthesis, a dried 50 mL flask was charged with  $\alpha,\beta$ -unsaturated 2-acylimidazoles **1a** (636.8 mg, 3.0 mmol), *N*-alkoxyacrylamides **2a** (890.2 mg, 3.6 mmol) and chiral catalyst **A-Rh3** (24.9 mg, 1.0 mol%). The tube was purged with argon, then dry MeCN (15.0 mL) and triethylamine (83.4  $\mu$ L, 0.6 mmol) were added successively. The reaction mixture was stirred at 30°C for 24 hours (monitored by TLC) under argon. After the reaction was completed, the solvent was removed under reduced pressure and the mixture was purified by flash column chromatography on silica gel (petroleum ether/ EtOAc = 6:1 to 3:1) to afford **3a** (1.24 g, 90% yield). Enantiomeric excess was determined by HPLC analysis, ee = 97%. In addition, when catalyst loading was reduced to 0.5 mol%, **3a** could be afforded in 87% yield with

95% ee after 36 hours. Remarkably, when as low as 0.2 mol% of  $\Delta$ -**Rh3** was employed, **3a** still could be obtained in 75% yield with 94% ee after 72 hours.

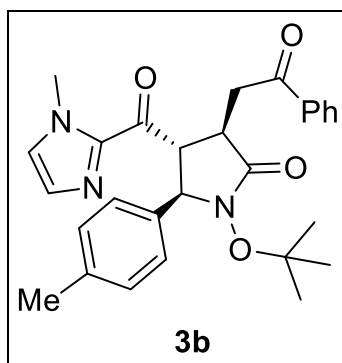

According to the general procedure, **3b** was obtained as white solid (87.1 mg, 92% yield), m.p. 117.3–118.1°C.

Enantiomeric excess was determined by HPLC analysis, ee = 96%, Chiralpak column ADH,  $\lambda$ =254 nm, *n*-hexane/*i*-PrOH=70:30, flow rate: 0.8 mL/min, 25°C,  $t_r$ (minor)=11.922 min,  $t_r$ (major)=20.335 min.

$[\alpha]_D^{20} = +99.8$  (c=0.5, CH<sub>2</sub>Cl<sub>2</sub>);

**<sup>1</sup>H NMR** (400 MHz, CDCl<sub>3</sub>)  $\delta$  7.77 (dd,  $J$  = 8.4, 1.3 Hz, 2H), 7.54 – 7.46 (m, 1H), 7.38 (t,  $J$  = 7.7 Hz, 2H), 7.27 (s, 2H), 7.14 (d,  $J$  = 8.2 Hz, 2H), 6.96 (s, 1H), 6.82 (s, 1H), 5.17 (d,  $J$  = 5.8 Hz, 1H), 4.36 (t,  $J$  = 6.9 Hz, 1H), 4.04 (s, 3H), 3.72 (dd,  $J$  = 18.1, 3.2 Hz, 1H), 3.52 – 3.43 (m, 1H), 3.31 (dd,  $J$  = 17.9, 9.5 Hz, 1H), 2.31 (s, 3H), 1.22 (s, 9H).

**<sup>13</sup>C NMR** (101 MHz, CDCl<sub>3</sub>)  $\delta$  197.54, 189.75, 173.14, 142.82, 137.87, 136.53, 135.97, 133.00, 129.42, 129.33, 128.38, 127.94, 127.59, 84.47, 64.77, 53.64, 39.97, 38.09, 36.12, 27.64, 21.15.

**HRMS** (ESI) calcd for C<sub>28</sub>H<sub>32</sub>N<sub>3</sub>O<sub>4</sub> [M+H]<sup>+</sup> : 474.2363; found: 474.2366.

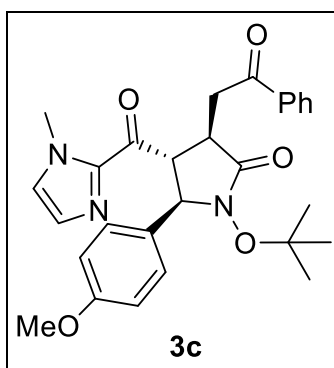

According to the general procedure, **3c** was obtained as colorless oil (88.2 mg, 90% yield).

Enantiomeric excess was determined by HPLC analysis, ee = 96%, Chiralpak column ADH,  $\lambda$ =254 nm, *n*-hexane/*i*-PrOH=70:30, flow rate: 0.8 mL/min, 25°C,  $t_r$ (minor)=15.117 min,  $t_r$ (major)=31.042 min.

$[\alpha]_D^{20} = +101.8$  (c=0.5, CH<sub>2</sub>Cl<sub>2</sub>);

**<sup>1</sup>H NMR** (400 MHz, CDCl<sub>3</sub>)  $\delta$  7.79 – 7.75 (m, 2H), 7.53 – 7.48 (m, 1H), 7.38 (t,  $J$  = 7.7 Hz, 2H), 7.33 – 7.29 (m, 2H), 6.96 (s, 1H), 6.89 – 6.84 (m, 2H), 6.82 (d,  $J$  = 0.9 Hz, 1H), 5.16 (d,  $J$  = 6.4 Hz, 1H), 4.38 (dd,  $J$  = 8.0, 6.3 Hz, 1H), 4.05 (s, 3H), 3.78 (s, 3H), 3.73 (dd,  $J$  = 18.1, 2.8 Hz, 1H), 3.45 (ddd,  $J$  = 9.4, 7.9, 2.8 Hz, 1H), 3.33 (dd,  $J$  = 18.1, 9.4 Hz, 1H), 1.20 (s, 9H).

**<sup>13</sup>C NMR** (101 MHz, CDCl<sub>3</sub>)  $\delta$  197.59, 189.76, 173.16, 159.50, 142.90, 136.52, 133.07, 130.82, 129.46, 129.08, 128.43, 127.97, 127.69, 114.03, 84.46, 64.54, 55.27, 53.63, 39.85, 38.25, 36.18, 27.70.

**HRMS** (ESI) calcd for C<sub>28</sub>H<sub>32</sub>N<sub>3</sub>O<sub>5</sub> [M+H]<sup>+</sup> : 490.2342; found: 490.2335.

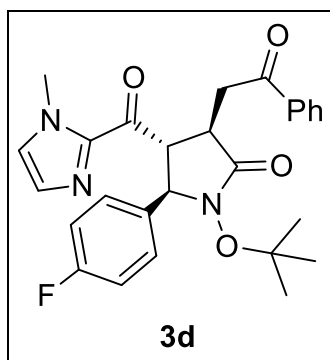

According to the general procedure, **3d** was obtained as white solid (80.2 mg, 84% yield), m.p. 139.6–140.4°C.

Enantiomeric excess was determined by HPLC analysis, ee = 96%, Chiralpak column ADH,  $\lambda$ =254 nm, *n*-hexane/*i*-PrOH=70:30, flow rate: 0.8 mL/min, 25°C,  $t_r$ (minor)=14.097 min,  $t_r$ (major)= 22.008 min.

$[\alpha]_D^{20} = +75.2$  (c=0.5, CH<sub>2</sub>Cl<sub>2</sub>);

**<sup>1</sup>H NMR** (400 MHz, CDCl<sub>3</sub>)  $\delta$  7.80 – 7.76 (m, 2H), 7.54 – 7.49 (m, 1H), 7.39 (ddd,  $J$  = 7.3, 5.9, 1.7 Hz, 4H), 7.04 (t,  $J$  = 8.7 Hz, 2H), 6.98 (s, 1H), 6.83 (d,  $J$  = 0.9 Hz, 1H), 5.20 (d,  $J$  = 6.2 Hz, 1H), 4.41 – 4.36 (m, 1H), 4.06 (s, 3H), 3.73 (dd,  $J$  = 18.2, 2.8 Hz,



1H), 3.45 (ddd,  $J = 10.6, 7.8, 2.8$  Hz, 1H), 3.32 (dd,  $J = 18.0, 9.4$  Hz, 1H), 1.21 (s, 9H).

**$^{13}\text{C}$  NMR** (101 MHz,  $\text{CDCl}_3$ )  $\delta$  197.48, 189.47, 173.08, 163.83, 161.37, 142.80, 136.46, 134.75, 133.13, 129.55, 129.50, 128.46, 127.97, 127.79, 115.74, 115.52, 84.67, 64.37, 53.64, 39.68, 38.08, 36.20, 27.68.

**$^{19}\text{F}$  NMR** (376 MHz,  $\text{CDCl}_3$ )  $\delta$  -113.93.

**HRMS** (ESI) calcd for  $\text{C}_{27}\text{H}_{29}\text{FN}_3\text{O}_4$   $[\text{M}+\text{H}]^+$  : 478.2132; found: 478.2134.

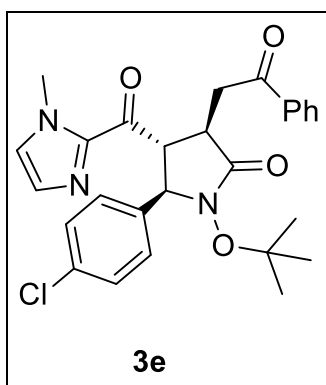

According to the general procedure, **3e** was obtained as white solid (93.8 mg, 95% yield), m.p. 129.2–131.2°C.

Enantiomeric excess was determined by HPLC analysis, ee = 96%, Chiralpak column ADH,  $\lambda$ =254 nm, *n*-hexane/*i*-PrOH=70:30, flow rate: 0.8 mL/min, 25°C,  $t_r(\text{minor})$  =13.069 min,  $t_r(\text{major})$ =22.545 min.

$[\alpha]_D^{20} = +114.8$  ( $c=0.5$ ,  $\text{CH}_2\text{Cl}_2$ );

**$^1\text{H}$  NMR** (400 MHz,  $\text{CDCl}_3$ )  $\delta$  7.80 – 7.76 (m, 2H), 7.55 – 7.50 (m, 1H), 7.44 – 7.29 (m, 6H), 6.98 (d,  $J = 0.9$  Hz, 1H), 6.84 (d,  $J = 1.0$  Hz, 1H), 5.20 (d,  $J = 6.0$  Hz, 1H), 4.34 (dd,  $J = 7.7, 6.0$  Hz, 1H), 4.06 (s, 3H), 3.73 (dd,  $J = 18.3, 3.0$  Hz, 1H), 3.46 (ddd,  $J = 9.4, 7.8, 3.1$  Hz, 1H), 3.29 (dd,  $J = 18.2, 9.4$  Hz, 1H), 1.22 (s, 9H).

**$^{13}\text{C}$  NMR** (101 MHz,  $\text{CDCl}_3$ )  $\delta$  197.45, 189.36, 173.05, 142.72, 137.66, 136.44, 134.03, 133.15, 129.59, 129.13, 128.91, 128.47, 127.98, 127.82, 84.77, 64.42, 53.58, 39.70, 37.95, 36.20, 27.68.

**HRMS** (ESI) calcd for  $\text{C}_{27}\text{H}_{29}\text{ClN}_3\text{O}_4$   $[\text{M}+\text{H}]^+$ : 494.1826; found: 494.1821.

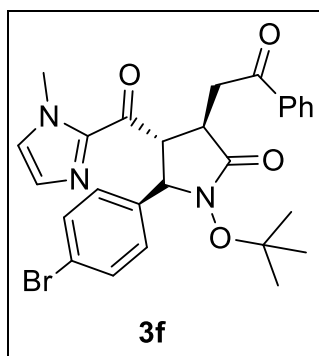

According to the general procedure, **3f** was obtained as white solid (87.4 mg, 88% yield), m.p. 161.9–163.5°C.

Enantiomeric excess was determined by HPLC analysis, ee = 96%, Chiralpak column ADH,  $\lambda$ =254 nm, *n*-hexane/*i*-PrOH=70:30, flow rate: 0.8 mL/min, 25°C,  $t_r$ (minor)=12.803 min,  $t_r$ (major)=24.089 min.

$[\alpha]_D^{20}$ =+99.8 (*c*=0.5, CH<sub>2</sub>Cl<sub>2</sub>);

**<sup>1</sup>H NMR** (400 MHz, CDCl<sub>3</sub>)  $\delta$  7.77 (dd, *J* = 8.4, 1.3 Hz, 2H), 7.54 – 7.45 (m, 3H), 7.44 – 7.35 (m, 2H), 7.31 – 7.27 (m, 2H), 6.99 (d, *J* = 1.0 Hz, 1H), 6.84 (d, *J* = 0.9 Hz, 1H), 5.18 (d, *J* = 6.0 Hz, 1H), 4.33 (dd, *J* = 7.7, 5.9 Hz, 1H), 4.06 (s, 3H), 3.72 (dd, *J* = 18.2, 3.0 Hz, 1H), 3.46 (ddd, *J* = 9.3, 7.6, 2.9 Hz, 1H), 3.28 (dd, *J* = 18.3, 9.4 Hz, 1H), 1.22 (s, 9H).

**<sup>13</sup>C NMR** (101 MHz, CDCl<sub>3</sub>)  $\delta$  197.46, 189.34, 173.06, 142.69, 138.22, 136.43, 133.16, 131.86, 129.60, 129.45, 128.48, 127.98, 127.85, 122.22, 84.80, 64.49, 53.52, 39.70, 37.93, 36.21, 27.68.

**HRMS** (ESI) calcd for C<sub>27</sub>H<sub>29</sub>BrN<sub>3</sub>O<sub>4</sub> [*M*+*H*]<sup>+</sup> : 538.1311; found: 538.1312.

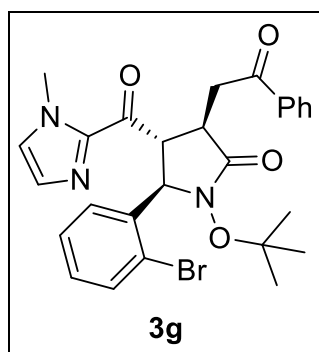

According to the general procedure, **3g** was obtained as white solid (84.4 mg, 82% yield), m.p. 158.2–159.3°C.

Enantiomeric excess was determined by HPLC analysis, ee = 85%, Chiralpak column ADH,  $\lambda$ =254 nm, *n*-hexane/*i*-PrOH=70:30, flow rate: 0.8 mL/min, 25°C,  $t_r$ (minor)=14.841 min,  $t_r$ (major)=18.910 min.

$[\alpha]_D^{20} = +74.7$  (c=0.5, CH<sub>2</sub>Cl<sub>2</sub>).

**<sup>1</sup>H NMR** (400 MHz, CDCl<sub>3</sub>)  $\delta$  7.80 (d,  $J$  = 8.2 Hz, 2H), 7.49 (t,  $J$  = 7.5 Hz, 2H), 7.38 (t,  $J$  = 7.7 Hz, 4H), 7.17 – 7.12 (m, 1H), 7.01 (s, 1H), 6.84 (s, 1H), 5.78 – 5.69 (m, 1H), 4.23 (d,  $J$  = 12.8 Hz, 1H), 4.08 (s, 3H), 3.66 – 3.58 (m, 1H), 3.47 (dd,  $J$  = 7.4, 4.3 Hz, 1H), 3.32 (d,  $J$  = 16.5 Hz, 1H), 1.31 (s, 9H).

**<sup>13</sup>C NMR** (101 MHz, CDCl<sub>3</sub>)  $\delta$  197.06, 189.63, 172.58, 136.68, 132.97, 129.45, 129.39, 128.40, 128.05, 127.86, 127.70, 122.84, 84.98, 67.96, 52.80, 40.39, 38.38, 36.15, 27.56, 25.61.

**HRMS** (ESI) calcd for C<sub>27</sub>H<sub>29</sub>BrN<sub>3</sub>O<sub>4</sub> [M+H]<sup>+</sup> : 538.1311; found: 538.1314.

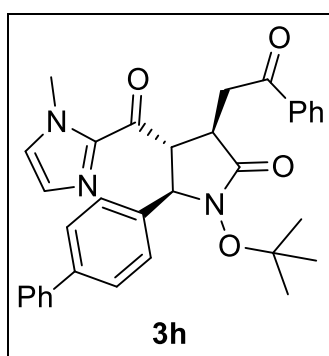

According to the general procedure, **3h** was obtained as white solid (101.8 mg, 95% yield), m.p. 72.4-73.3°C.

Enantiomeric excess was determined by HPLC analysis, ee = 96%, Chiralpak column ADH,  $\lambda$ =254 nm, *n*-hexane/*i*-PrOH=70:30, flow rate: 0.8 mL/min, 25°C,  $t_r$ (minor)=16.032 min,  $t_r$ (major)=51.722 min.

$[\alpha]_D^{20} = +79.3$  (c=0.5, CH<sub>2</sub>Cl<sub>2</sub>).

**<sup>1</sup>H NMR** (400 MHz, CDCl<sub>3</sub>)  $\delta$  7.79 – 7.76 (m, 2H), 7.59 – 7.56 (m, 4H), 7.51 – 7.30 (m, 8H), 6.98 (s, 1H), 6.85 (d,  $J$  = 1.0 Hz, 1H), 5.28 (d,  $J$  = 1.3 Hz, 1H), 4.41 (dd,  $J$  = 7.5, 5.7 Hz, 1H), 4.06 (s, 3H), 3.74 (dd,  $J$  = 18.2, 3.0 Hz, 1H), 3.51 (ddd,  $J$  = 9.4, 7.5, 3.1 Hz, 1H), 3.34 (dd,  $J$  = 18.2, 9.5 Hz, 1H), 1.25 (s, 9H).

**<sup>13</sup>C NMR** (101 MHz, CDCl<sub>3</sub>)  $\delta$  197.62, 189.76, 173.26, 142.88, 141.09, 140.70, 138.28, 136.62, 133.14, 129.61, 128.86, 128.52, 128.16, 128.06, 127.78, 127.47, 127.15, 84.76, 68.07, 64.84, 53.71, 40.04, 38.08, 36.26, 27.77, 25.72.

**HRMS** (ESI) calcd for C<sub>33</sub>H<sub>34</sub>N<sub>3</sub>O<sub>4</sub> [M+H]<sup>+</sup> : 536.2549; found: 536.2545.

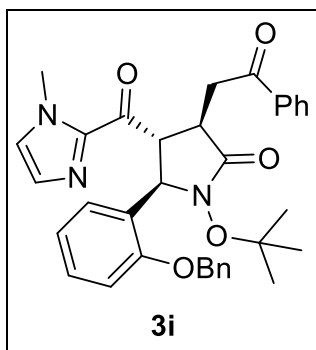

According to the general procedure, **3i** was obtained as pale yellow oil (85.0 mg, 75% yield).

Enantiomeric excess was determined by HPLC analysis, ee = 94%, Chiralpak column ADH,  $\lambda$ =254 nm, *n*-hexane/*i*-PrOH=70:30, flow rate: 0.8 mL/min, 25°C, *t<sub>r</sub>*(minor) = 12.423 min, *t<sub>r</sub>*(major)= 31.706 min.

$[\alpha]_D^{20}$  = +65.4 (c=0.5, CH<sub>2</sub>Cl<sub>2</sub>).

**<sup>1</sup>H NMR** (400 MHz, CDCl<sub>3</sub>)  $\delta$  7.68 (d, *J* = 7.6 Hz, 2H), 7.47 (t, *J* = 7.6 Hz, 1H), 7.34 (t, *J* = 7.6 Hz, 3H), 7.30 – 7.20 (m, 6H), 6.98 (t, *J* = 7.6 Hz, 1H), 6.94 – 6.90 (m, 3H), 5.55 (s, 1H), 5.04 (d, *J* = 11.6 Hz, 1H), 4.91 (d, *J* = 11.2 Hz, 1H), 4.47 (s, 1H), 3.88 (s, 3H), 3.58 (d, *J* = 14.8 Hz, 1H), 3.38 – 3.27 (m, 2H), 1.33 (s, 9H).

**<sup>13</sup>C NMR** (101 MHz, CDCl<sub>3</sub>)  $\delta$  197.71, 190.65, 172.65, 156.23, 142.09, 136.68, 132.86, 129.03, 128.30, 128.04, 127.69, 127.34, 120.84, 111.96, 84.57, 70.00, 52.38, 40.70, 38.35, 36.13, 27.62.

**HRMS** (ESI) calcd for C<sub>34</sub>H<sub>36</sub>N<sub>3</sub>O<sub>5</sub> [M+H]<sup>+</sup> : 565.2638; found: 565.2644.

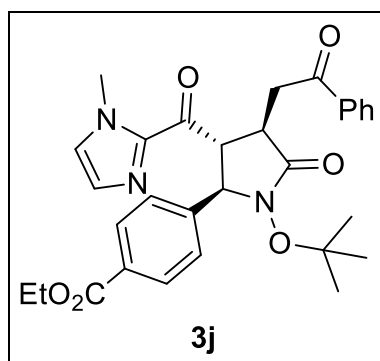

According to the general procedure, **3j** was obtained as white solid (101.0 mg, 95% yield), m.p. 76.6-78.3°C.

Enantiomeric excess was determined by HPLC analysis, ee = 95%, Chiralpak column ADH,  $\lambda$ =254 nm, *n*-hexane/*i*-PrOH=70:30, flow rate: 0.8 mL/min, 25°C,  $t_r$ (minor)=15.429 min,  $t_r$ (major)=39.266 min.

$[\alpha]_D^{20} = +51.0$  (c=0.5, CH<sub>2</sub>Cl<sub>2</sub>).

**<sup>1</sup>H NMR** (400 MHz, CDCl<sub>3</sub>)  $\delta$  8.05 – 7.97 (m, 2H), 7.80 – 7.73 (m, 2H), 7.48 (t,  $J$  = 8.1 Hz, 3H), 7.37 (t,  $J$  = 7.7 Hz, 2H), 6.98 (s, 1H), 6.83 (s, 1H), 5.27 (d,  $J$  = 5.7 Hz, 1H), 4.39 – 4.31 (m, 3H), 4.06 (s, 3H), 3.72 (dd,  $J$  = 18.3, 3.1 Hz, 1H), 3.48 (td,  $J$  = 7.8, 7.0, 3.9 Hz, 1H), 3.27 (dd,  $J$  = 18.3, 9.4 Hz, 1H), 1.37 (t,  $J$  = 8.0 Hz, 3H), 1.22 (s, 9H).

**<sup>13</sup>C NMR** (101 MHz, CDCl<sub>3</sub>)  $\delta$  197.38, 189.25, 173.03, 166.28, 144.22, 142.61, 136.39, 133.11, 130.34, 129.95, 129.58, 128.43, 127.95, 127.81, 127.61, 84.81, 64.74, 61.01, 53.49, 39.76, 37.84, 36.15, 27.62, 14.32.

**HRMS** (ESI) calcd for C<sub>30</sub>H<sub>34</sub>N<sub>3</sub>O<sub>6</sub> [M+H]<sup>+</sup> : 532.2291; found: 532.2287.

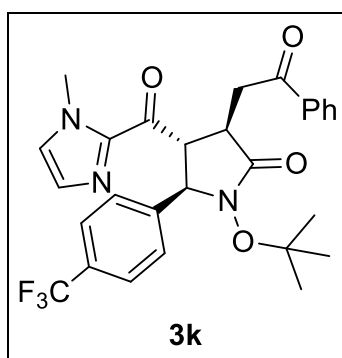

According to the general procedure, **3k** was obtained as white solid (76.0 mg, 72% yield), m.p. 134.4-135.2°C.

Enantiomeric excess was determined by HPLC analysis, ee = 93%, Chiralpak column ADH,  $\lambda$ =254 nm, *n*-hexane/*i*-PrOH=70:30, flow rate: 0.8 mL/min, 25°C,  $t_r$ (minor)=8.733 min,  $t_r$ (major)=15.312 min.

$[\alpha]_D^{20} = +63.8$  (c=0.5, CH<sub>2</sub>Cl<sub>2</sub>).

**<sup>1</sup>H NMR** (400 MHz, CDCl<sub>3</sub>)  $\delta$  7.80 – 7.74 (m, 2H), 7.61 (d,  $J$  = 8.3 Hz, 2H), 7.52 (dd,  $J$  = 14.7, 7.7 Hz, 3H), 7.38 (t,  $J$  = 7.8 Hz, 2H), 7.00 (s, 1H), 6.84 (s, 1H), 5.29 (d,  $J$  = 5.7 Hz, 1H), 4.35 – 4.30 (m, 1H), 4.06 (s, 3H), 3.72 (dd,  $J$  = 18.2, 3.2 Hz, 1H), 3.52 – 3.45 (m, 1H), 3.27 (dd,  $J$  = 18.2, 9.3 Hz, 1H), 1.23 (d,  $J$  = 1.3 Hz, 9H).

**<sup>13</sup>C NMR** (101 MHz, CDCl<sub>3</sub>) δ 197.35, 189.15, 172.95, 143.39, 142.56, 136.37, 133.16, 129.62, 128.45, 127.94, 127.89, 125.70, 125.67, 84.95, 64.51, 53.44, 39.61, 37.73, 36.17, 27.61.

**<sup>19</sup>F NMR** (376 MHz, CDCl<sub>3</sub>) δ -62.58.

**HRMS (ESI)** calcd for C<sub>28</sub>H<sub>29</sub>F<sub>3</sub>N<sub>3</sub>O<sub>4</sub> [M+H]<sup>+</sup> : 528.2120; found: 528.2117.

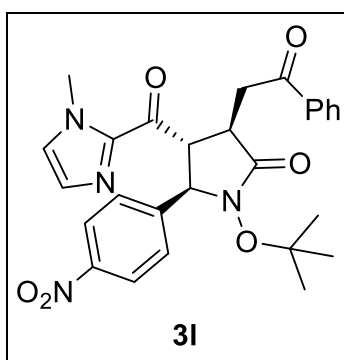

According to the general procedure, **31** was obtained as pale yellow oil (87.5 mg, 87% yield).

Enantiomeric excess was determined by HPLC analysis, ee = 95%, Chiralpak column ADH, λ=254 nm, *n*-hexane/*i*-PrOH=70:30, flow rate: 0.8 mL/min, 25°C, t<sub>r</sub>(minor) = 22.673 min, t<sub>r</sub>(major)= 34.114 min.

[α]<sub>D</sub><sup>20</sup> = +64.0 (c=0.5, CH<sub>2</sub>Cl<sub>2</sub>).

**<sup>1</sup>H NMR** (400 MHz, CDCl<sub>3</sub>) δ 8.21 (d, *J* = 8.8 Hz, 2H), 7.78 (d, *J* = 8.4 Hz, 2H), 7.62 (d, *J* = 8.4 Hz, 2H), 7.52 (t, *J* = 7.2 Hz, 1H), 7.39 (t, *J* = 7.2 Hz, 2H), 7.02 (s, 1H), 6.87 (s, 1H), 5.34 (d, *J* = 5.7 Hz, 1H), 4.37 (dd, *J* = 7.6, 5.7 Hz, 1H), 4.08 (s, 3H), 3.74 (dd, *J* = 18.3, 3.0 Hz, 1H), 3.51 – 3.44 (m, 1H), 3.28 (dd, *J* = 18.3, 9.2 Hz, 1H), 1.23 (s, 9H).

**<sup>13</sup>C NMR** (101 MHz, CDCl<sub>3</sub>) δ 197.29, 188.80, 172.84, 147.81, 146.75, 142.41, 136.35, 133.23, 129.55, 128.63, 128.48, 127.94, 123.93, 85.08, 64.39, 53.27, 39.39, 37.71, 36.18, 27.63.

**HRMS (ESI)** calcd for C<sub>27</sub>H<sub>29</sub>N<sub>4</sub>O<sub>6</sub> [M+H]<sup>+</sup> : 504.2032; found: 504.2027.

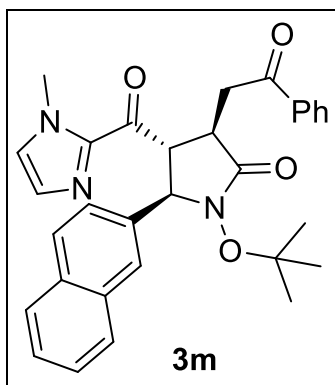

According to the general procedure, **3m** was obtained as white solid (71.3 mg, 70% yield), m.p. 66.3-67.0°C.

Enantiomeric excess was determined by HPLC analysis, ee = 96%, Chiralpak column ADH,  $\lambda$ =254 nm, *n*-hexane/*i*-PrOH=70:30, flow rate: 0.8 mL/min, 25°C,  $t_r$ (minor)=13.211 min,  $t_r$ (major)=25.706 min.

$[\alpha]_D^{20}$  = +89.6 (*c*=0.5, CH<sub>2</sub>Cl<sub>2</sub>);

**<sup>1</sup>H NMR** (400 MHz, CDCl<sub>3</sub>)  $\delta$  7.88 – 7.74 (m, 6H), 7.57 (dd, *J* = 8.6, 1.8 Hz, 1H), 7.53 – 7.44 (m, 3H), 7.39 – 7.34 (m, 2H), 6.95 (d, *J* = 0.9 Hz, 1H), 6.79 (d, *J* = 1.0 Hz, 1H), 5.42 (d, *J* = 6.1 Hz, 1H), 4.50 – 4.45 (m, 1H), 4.06 (s, 3H), 3.76 (dd, *J* = 18.2, 3.1 Hz, 1H), 3.53 (ddd, *J* = 9.4, 7.9, 2.9 Hz, 1H), 3.37 (dd, *J* = 18.3, 9.4 Hz, 1H), 1.22 (s, 9H).

**<sup>13</sup>C NMR** (101 MHz, CDCl<sub>3</sub>)  $\delta$  197.54, 189.60, 172.98, 142.82, 136.50, 136.48, 133.21, 133.15, 133.01, 129.47, 128.74, 128.38, 128.06, 127.96, 127.70, 127.65, 127.02, 126.20, 126.17, 125.04, 84.73, 65.12, 53.84, 39.86, 38.26, 36.14, 27.68.

**HRMS** (ESI) calcd for C<sub>31</sub>H<sub>32</sub>N<sub>3</sub>O<sub>4</sub> [M+H]<sup>+</sup> : 510.2343; found: 510.2347.

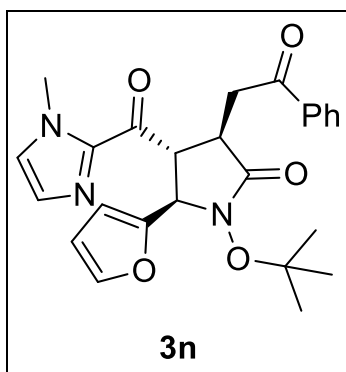

According to the general procedure, **3n** was obtained as white solid (72.8 mg, 81% yield), m.p. 138.2-140.3°C.

Enantiomeric excess was determined by HPLC analysis, ee = 95%, Chiralpak column ADH,  $\lambda$ =254 nm, *n*-hexane/*i*-PrOH=70:30, flow rate: 0.8 mL/min, 25°C,  $t_r$ (minor)=16.858 min,  $t_r$ (major)=25.028 min.

$[\alpha]_D^{20} = +77.6$  (c=0.5, CH<sub>2</sub>Cl<sub>2</sub>);

**<sup>1</sup>H NMR** (400 MHz, CDCl<sub>3</sub>)  $\delta$  7.83 – 7.79 (m, 2H), 7.55 – 7.50 (m, 1H), 7.43 – 7.38 (m, 3H), 6.97 (s, 1H), 6.83 (d,  $J$  = 1.0 Hz, 1H), 6.42 (d,  $J$  = 4.0 Hz, 1H), 6.32-6.28 (m, 1H), 5.10 (d,  $J$  = 6.8 Hz, 1H), 4.65 (t,  $J$  = 7.4 Hz, 1H), 4.04 (s, 3H), 3.79 – 3.66 (m, 1H), 3.53 (dd,  $J$  = 17.9, 9.3 Hz, 1H), 3.44 (ddd,  $J$  = 9.4, 7.8, 2.9 Hz, 1H), 1.19 (s, 9H).

**<sup>13</sup>C NMR** (101 MHz, CDCl<sub>3</sub>)  $\delta$  197.53, 189.18, 174.14, 150.05, 143.07, 142.81, 136.53, 133.02, 129.51, 128.40, 127.96, 127.66, 110.80, 110.45, 84.04, 58.20, 49.24, 40.09, 38.48, 36.08, 27.34.

**HRMS** (ESI) calcd for C<sub>25</sub>H<sub>28</sub>N<sub>3</sub>O<sub>5</sub> [M+H]<sup>+</sup> : 450.2219; found: 450.2216.

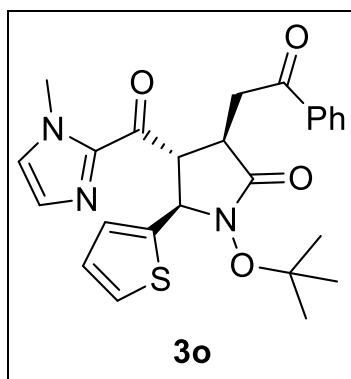

According to the general procedure, **3o** was obtained as white solid (76.4 mg, 82% yield), m.p. 145.7-146.3°C.

Enantiomeric excess was determined by HPLC analysis, ee = 96%, Chiralpak column ADH,  $\lambda$ =254 nm, *n*-hexane/*i*-PrOH=70:30, flow rate: 0.8 mL/min, 25°C,  $t_r$ (minor)=18.240 min,  $t_r$ (major)=26.487 min.

$[\alpha]_D^{20} = +78.8$  (c=0.5, CH<sub>2</sub>Cl<sub>2</sub>);

**<sup>1</sup>H NMR** (400 MHz, CDCl<sub>3</sub>)  $\delta$  7.81 – 7.77 (m, 2H), 7.54 – 7.49 (m, 1H), 7.42 – 7.36 (m, 2H), 7.29 – 7.26 (m, 1H), 7.15 (dd,  $J$  = 3.5, 1.5 Hz, 1H), 6.98 – 6.93 (m, 2H), 6.84 (d,  $J$  = 1.0 Hz, 1H), 5.39 (d,  $J$  = 6.8 Hz, 1H), 4.57 (t,  $J$  = 7.1 Hz, 1H), 4.05 (s, 3H), 3.78 – 3.68 (m, 1H), 3.49 – 3.40 (m, 2H), 1.21 (s, 9H).

**<sup>13</sup>C NMR** (101 MHz, CDCl<sub>3</sub>)  $\delta$  197.42, 189.03, 173.38, 142.87, 141.58, 136.49, 133.07, 129.60, 129.57, 129.55, 128.44, 128.42, 128.39, 127.96, 127.73, 127.60, 126.81, 126.00, 84.37, 60.28, 53.24, 39.90, 38.59, 36.08, 27.53.



**HRMS** (ESI) calcd for C<sub>25</sub>H<sub>28</sub>N<sub>3</sub>O<sub>4</sub>S [M+H]<sup>+</sup> : 466.1800; found: 466.1801.

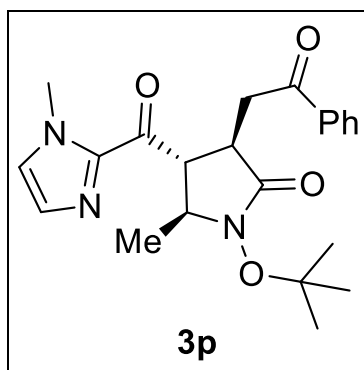

According to the general procedure, **3p** was obtained as pale yellow oil (52.5 mg, 66% yield).

Enantiomeric excess was determined by HPLC analysis, ee = 93%, Chiralpak column ADH,  $\lambda$ =254 nm, *n*-hexane/*i*-PrOH=70:30, flow rate: 0.8 mL/min, 25°C, *t<sub>r</sub>*(minor)=12.880 min, *t<sub>r</sub>*(major)=18.788 min.

$[\alpha]_D^{20}$  = +82.4 (c=0.5, CH<sub>2</sub>Cl<sub>2</sub>);

**<sup>1</sup>H NMR** (400 MHz, CDCl<sub>3</sub>)  $\delta$  7.79 (dd, *J* = 8.3, 1.3 Hz, 2H), 7.53 – 7.47 (m, 1H), 7.38 (t, *J* = 7.7 Hz, 2H), 7.02 (s, 1H), 6.93 (d, *J* = 0.9 Hz, 1H), 4.06 (s, 3H), 4.05–3.98 (m, 2H), 3.72 (dd, *J* = 18.2, 3.1 Hz, 1H), 3.41 (ddd, *J* = 10.4, 7.5, 3.1 Hz, 1H), 3.23 (dd, *J* = 18.3, 9.7 Hz, 1H), 1.42 (d, *J* = 6.1 Hz, 3H), 1.34 (s, 9H).

**<sup>13</sup>C NMR** (101 MHz, CDCl<sub>3</sub>)  $\delta$  197.66, 190.39, 172.51, 143.07, 136.47, 133.09, 129.40, 128.44, 127.94, 127.69, 84.25, 57.25, 52.28, 40.19, 37.33, 36.17, 27.68, 19.29.

**HRMS** (ESI) calcd for C<sub>22</sub>H<sub>28</sub>N<sub>3</sub>O<sub>4</sub> [M+H]<sup>+</sup> : 398.2080; found: 398.2077.

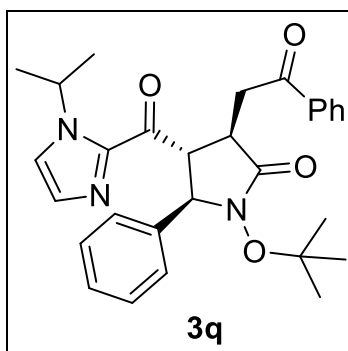

According to the general procedure, **3q** was obtained as pale yellow oil (89.7 mg, 92% yield).

Enantiomeric excess was determined by HPLC analysis, ee = 90%, Chiralpak column ADH,  $\lambda$ =254 nm, *n*-hexane/*i*-PrOH=70:30, flow rate: 0.8 mL/min, 25°C,  $t_r$ (minor)=8.146 min,  $t_r$ (major)=13.091 min.

$[\alpha]_D^{20} = +102.3$  (c=0.5, CH<sub>2</sub>Cl<sub>2</sub>);

**<sup>1</sup>H NMR** (400 MHz, CDCl<sub>3</sub>)  $\delta$  7.79 – 7.74 (m, 2H), 7.51 (t,  $J$  = 7.4 Hz, 1H), 7.43 – 7.33 (m, 6H), 7.32 – 7.27 (m, 1H), 7.20 (s, 1H), 6.84 (s, 1H), 5.62 (p,  $J$  = 6.7 Hz, 1H), 5.25 (d,  $J$  = 6.0 Hz, 1H), 4.47 – 4.41 (m, 1H), 3.72 (dd,  $J$  = 18.2, 3.0 Hz, 1H), 3.52 (ddd,  $J$  = 10.5, 7.6, 2.9 Hz, 1H), 3.34 (dd,  $J$  = 18.2, 9.5 Hz, 1H), 1.55 (d,  $J$  = 6.7 Hz, 3H), 1.46 (d,  $J$  = 6.6 Hz, 3H), 1.23 (d,  $J$  = 1.6 Hz, 9H).

**<sup>13</sup>C NMR** (101 MHz, CDCl<sub>3</sub>)  $\delta$  197.31, 189.66, 173.14, 142.10, 139.06, 136.47, 132.98, 129.90, 128.62, 128.37, 128.13, 127.91, 127.71, 121.87, 84.54, 65.04, 54.18, 49.38, 39.86, 38.14, 27.62, 23.60, 23.55.

**HRMS** (ESI) calcd for C<sub>29</sub>H<sub>34</sub>N<sub>3</sub>O<sub>4</sub> [M+H]<sup>+</sup> : 488.2549; found: 488.2546.

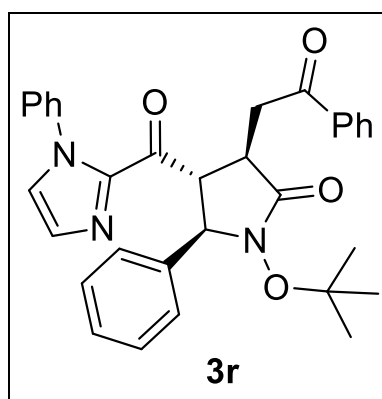

According to the general procedure, **3r** was obtained as white solid (78.4 mg, 88% yield), m.p. 119.2-120.0°C.

Enantiomeric excess was determined by HPLC analysis, ee = 96%, Chiralpak column ADH,  $\lambda$ =254 nm, *n*-hexane/*i*-PrOH=70:30, flow rate: 0.8 mL/min, 25°C,  $t_r$ (minor)=10.520 min,  $t_r$ (major)=16.595 min.

$[\alpha]_D^{20} = +123.2$  (c=0.5, CH<sub>2</sub>Cl<sub>2</sub>);

**<sup>1</sup>H NMR** (400 MHz, CDCl<sub>3</sub>)  $\delta$  7.83 – 7.77 (m, 2H), 7.56 – 7.46 (m, 6H), 7.42 – 7.37 (m, 2H), 7.35 – 7.27 (m, 5H), 7.07 (d,  $J$  = 1.0 Hz, 1H), 6.84 (d,  $J$  = 1.1 Hz, 1H), 5.21 (d,  $J$  = 6.7 Hz, 1H), 4.41 (dd,  $J$  = 8.4, 6.7 Hz, 1H), 3.81 – 3.76 (m, 1H), 3.52 – 3.40 (m, 2H), 1.17 (s, 9H).

**<sup>13</sup>C NMR** (101 MHz, CDCl<sub>3</sub>) δ 197.58, 188.15, 172.34, 142.96, 138.72, 138.25, 136.41, 133.08, 129.83, 129.10, 128.90, 128.60, 128.41, 128.18, 127.96, 127.81, 127.59, 125.89, 84.63, 67.96, 64.64, 54.70, 40.13, 38.31, 27.61, 25.61.

**HRMS** (ESI) calcd for C<sub>32</sub>H<sub>32</sub>N<sub>3</sub>O<sub>4</sub> [M+H]<sup>+</sup> : 522.2303; found:522.2306.

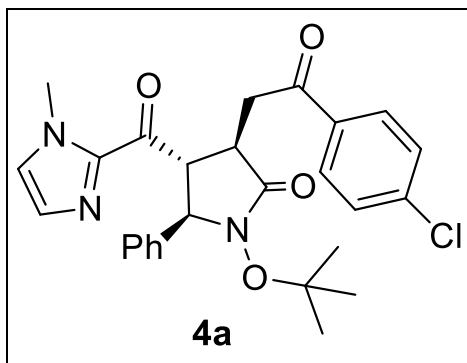

According to the general procedure, **4a** was obtained as white solid (91.9 mg, 93% yield), m.p. 130.3-131.2°C.

Enantiomeric excess was determined by HPLC analysis, ee = 95%, Chiralpak column ADH, λ=254 nm, *n*-hexane/*i*-PrOH=70:30, flow rate: 0.8 mL/min, 25°C, *t<sub>r</sub>*(minor)=20.756 min, *t<sub>r</sub>*(major)=41.041 min.

[α]<sub>D</sub><sup>20</sup> = +59.0 (c=0.5, CH<sub>2</sub>Cl<sub>2</sub>);

**<sup>1</sup>H NMR** (400 MHz, CDCl<sub>3</sub>) δ 7.76 – 7.70 (m, 2H), 7.42 – 7.32 (m, 6H), 7.32 – 7.28 (m, 1H), 6.99 (s, 1H), 6.83 (s, 1H), 5.25 (d, J = 6.1 Hz, 1H), 4.42 – 4.36 (m, 1H), 4.06 (s, 3H), 3.69 (dd, J = 18.0, 3.2 Hz, 1H), 3.46 (td, J = 8.4, 7.8, 3.1 Hz, 1H), 3.32 (dd, J = 18.0, 9.1 Hz, 1H), 1.23 (s, 9H).

**<sup>13</sup>C NMR** (101 MHz, CDCl<sub>3</sub>) δ 196.34, 189.46, 172.84, 142.73, 139.44, 138.93, 134.83, 129.46, 129.38, 128.73, 128.67, 128.22, 127.72, 127.69, 84.61, 64.83, 53.58, 39.77, 38.14, 36.16, 27.62.

**HRMS** (ESI) calcd for C<sub>27</sub>H<sub>29</sub>ClN<sub>3</sub>O<sub>4</sub> [M+H]<sup>+</sup> : 494.2846; found: 494.2844.

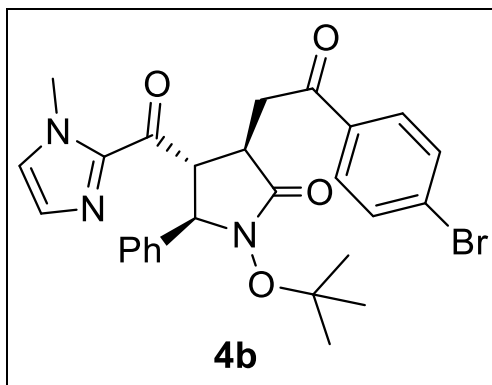

According to the general procedure, **4b** was obtained as white solid (79.7 mg, 74% yield), m.p. 74.3-75.1°C.

Enantiomeric excess was determined by HPLC analysis, ee = 96%, Chiralpak column ADH,  $\lambda$ =254 nm, *n*-hexane/*i*-PrOH=70:30, flow rate: 0.8 mL/min, 25°C,  $t_r$ (minor)=23.936 min,  $t_r$ (major)=46.675 min.

$[\alpha]_D^{20}$  = +64.3 (*c*=0.5, CH<sub>2</sub>Cl<sub>2</sub>);

**<sup>1</sup>H NMR** (400 MHz, CDCl<sub>3</sub>)  $\delta$  7.65 (dd, *J* = 8.6, 1.8 Hz, 2H), 7.54 (dd, *J* = 8.6, 1.8 Hz, 2H), 7.42 – 7.33 (m, 4H), 7.32 – 7.27 (m, 1H), 6.98 (s, 1H), 6.83 (s, 1H), 5.25 (d, *J* = 6.1 Hz, 1H), 4.42 – 4.35 (m, 1H), 4.05 (d, *J* = 1.7 Hz, 3H), 3.68 (dd, *J* = 18.0, 3.1 Hz, 1H), 3.46 (td, *J* = 8.3, 7.7, 3.1 Hz, 1H), 3.31 (dd, *J* = 18.0, 9.1 Hz, 1H), 1.23 (d, *J* = 1.7 Hz, 9H).

**<sup>13</sup>C NMR** (101 MHz, CDCl<sub>3</sub>)  $\delta$  196.55, 189.45, 172.82, 142.73, 138.92, 135.24, 131.73, 129.49, 128.67, 128.22, 128.18, 127.73, 127.70, 84.61, 64.82, 53.58, 39.75, 38.14, 36.16, 27.62.

**HRMS** (ESI) calcd for C<sub>27</sub>H<sub>29</sub>BrN<sub>3</sub>O<sub>4</sub> [*M*+*H*]<sup>+</sup> : 538.1341; found: 538.1336.

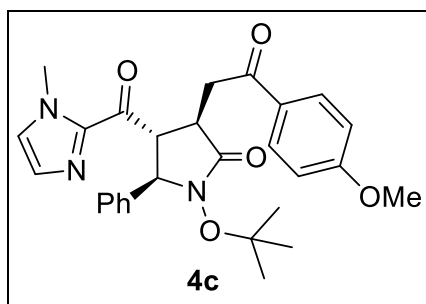

According to the general procedure, **4c** was obtained as colorless oil (90.1 mg, 92% yield).

Enantiomeric excess was determined by HPLC analysis, ee = 96%, Chiralpak column ADH,  $\lambda$ =254 nm, *n*-hexane/*i*-PrOH=70:30, flow rate: 0.8 mL/min, 25°C,  $t_r$ (minor)=17.594 min,  $t_r$ (major)=34.992 min.

$[\alpha]_D^{20} = +67.8$  (c=0.5, CH<sub>2</sub>Cl<sub>2</sub>);

**<sup>1</sup>H NMR** (400 MHz, CDCl<sub>3</sub>)  $\delta$  7.79 – 7.73 (m, 2H), 7.42 – 7.33 (m, 4H), 7.31 – 7.26 (m, 1H), 6.98 (s, 1H), 6.89 – 6.82 (m, 3H), 5.21 (d, *J* = 5.9 Hz, 1H), 4.40 – 4.35 (m, 1H), 4.06 (s, 3H), 3.84 (s, 3H), 3.68 (dd, *J* = 18.0, 3.1 Hz, 1H), 3.50 (ddd, *J* = 10.5, 7.5, 3.1 Hz, 1H), 3.26 (dd, *J* = 18.0, 9.6 Hz, 1H), 1.23 (s, 9H).

**<sup>13</sup>C NMR** (101 MHz, CDCl<sub>3</sub>)  $\delta$  195.90, 189.72, 173.35, 163.41, 142.75, 139.11, 130.20, 129.59, 129.41, 128.63, 128.13, 127.64, 127.62, 113.54, 84.54, 65.05, 55.42, 53.60, 39.52, 38.00, 36.14, 27.61.

**HRMS** (ESI) calcd for C<sub>28</sub>H<sub>32</sub>N<sub>3</sub>O<sub>5</sub> [M+H]<sup>+</sup> : 490.2312; found: 490.2316.

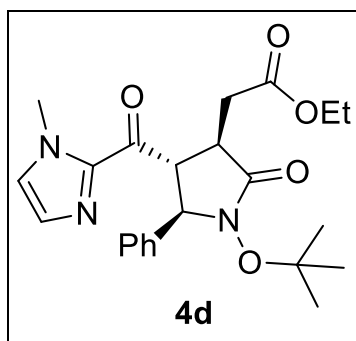

According to the general procedure, **4d** was obtained as white solid (81.2 mg, 95% yield), m.p. 119.2-120.3°C.

Enantiomeric excess was determined by HPLC analysis, ee = 84%, Chiralpak column ADH,  $\lambda$ =254 nm, *n*-hexane/*i*-PrOH=70:30, flow rate: 0.8 mL/min, 25°C,  $t_r$ (minor)=10.704 min,  $t_r$ (major)=21.090 min.

$[\alpha]_D^{20} = +61.2$  (c=1.0, CH<sub>2</sub>Cl<sub>2</sub>);

**<sup>1</sup>H NMR** (400 MHz, CDCl<sub>3</sub>)  $\delta$  7.36 – 7.28 (m, 5H), 7.07 (d, *J* = 2.9 Hz, 2H), 5.14 (d, *J* = 5.4 Hz, 1H), 4.43 – 4.38 (m, 1H), 4.02 (s, 3H), 4.00 – 3.90 (m, 2H), 3.23 (ddd, *J* = 9.2, 7.1, 4.3 Hz, 1H), 2.98 (dd, *J* = 17.3, 4.3 Hz, 1H), 2.64 (dd, *J* = 17.4, 9.2 Hz, 1H), 1.20 (s, 9H), 1.13 (t, *J* = 7.1 Hz, 3H).

**<sup>13</sup>C NMR** (101 MHz, CDCl<sub>3</sub>)  $\delta$  189.66, 172.42, 171.48, 142.51, 139.00, 129.65, 128.66, 128.17, 127.93, 127.52, 84.48, 64.87, 60.62, 52.69, 38.64, 36.15, 35.40, 27.56, 14.00.

**HRMS** (ESI) calcd for C<sub>23</sub>H<sub>30</sub>N<sub>3</sub>O<sub>5</sub> [M+H]<sup>+</sup> : 428.2185; found: 428.2188.

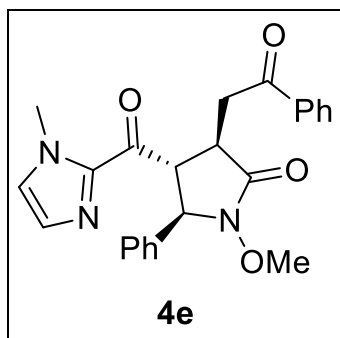

According to the general procedure, **4e** was obtained as white solid (73.5 mg, 88% yield), m.p. 149.0-150.9°C.

Enantiomeric excess was determined by HPLC analysis, ee = 92%, Chiralpak column ADH,  $\lambda$ =254 nm, *n*-hexane/*i*-PrOH=70:30, flow rate: 0.8 mL/min, 25°C, *t<sub>r</sub>*(minor)=28.522 min, *t<sub>r</sub>*(major)=32.210 min.

$[\alpha]_D^{20}$  = +72.0 (c=1.0, CH<sub>2</sub>Cl<sub>2</sub>);

**<sup>1</sup>H NMR** (400 MHz, CDCl<sub>3</sub>)  $\delta$  7.80 – 7.76 (m, 2H), 7.55 – 7.48 (m, 3H), 7.43 – 7.28 (m, 5H), 6.89 (d, *J* = 0.9 Hz, 1H), 6.67 (d, *J* = 1.0 Hz, 1H), 5.23 (d, *J* = 8.7 Hz, 1H), 4.49 (dd, *J* = 9.8, 8.7 Hz, 1H), 4.01 (s, 3H), 3.75 (dd, *J* = 18.5, 2.7 Hz, 1H), 3.68 (s, 3H), 3.54 (dd, *J* = 18.5, 8.7 Hz, 1H), 3.30 (ddd, *J* = 9.8, 8.6, 2.6 Hz, 1H).

**<sup>13</sup>C NMR** (101 MHz, CDCl<sub>3</sub>)  $\delta$  197.37, 188.83, 171.24, 143.23, 137.66, 136.45, 133.06, 129.40, 128.78, 128.71, 128.39, 127.94, 127.90, 127.86, 127.61, 63.04, 62.43, 52.96, 40.14, 39.16, 36.07.

**HRMS** (ESI) calcd for C<sub>24</sub>H<sub>24</sub>N<sub>3</sub>O<sub>4</sub> [M+H]<sup>+</sup> : 418.1767; found: 418.1769.

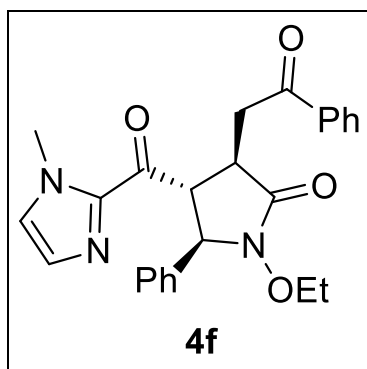

According to the general procedure, **4f** was obtained as white solid (65.6 mg, 76% yield), m.p. 117.8-119.1°C.

Enantiomeric excess was determined by HPLC analysis, ee = 92%, Chiralpak column ADH,  $\lambda$ =254 nm, *n*-hexane/*i*-PrOH=70:30, flow rate: 0.8 mL/min, 25°C,  $t_r$ (minor)=27.213 min,  $t_r$ (major)=31.737 min.

$[\alpha]_D^{20} = +80.3$  (c=0.5, CH<sub>2</sub>Cl<sub>2</sub>);

**<sup>1</sup>H NMR** (400 MHz, CDCl<sub>3</sub>)  $\delta$  7.78 (d,  $J$  = 7.6 Hz, 2H), 7.55 – 7.47 (m, 3H), 7.43 – 7.28 (m, 5H), 6.89 (s, 1H), 6.68 (s, 1H), 5.21 (d,  $J$  = 8.6 Hz, 1H), 4.50 (t,  $J$  = 9.1 Hz, 1H), 4.01 (s, 4H), 3.79 – 3.66 (m, 2H), 3.52 (dd,  $J$  = 18.4, 8.8 Hz, 1H), 3.30 (td,  $J$  = 9.3, 2.6 Hz, 1H), 1.12 (t,  $J$  = 8.6 Hz, 3H).

**<sup>13</sup>C NMR** (101 MHz, CDCl<sub>3</sub>)  $\delta$  197.44, 188.98, 171.37, 143.24, 137.74, 136.50, 133.03, 129.38, 128.71, 128.64, 128.38, 128.00, 127.95, 127.91, 127.58, 71.20, 62.94, 52.82, 40.05, 39.24, 36.07, 13.61.

**HRMS** (ESI) calcd for C<sub>25</sub>H<sub>26</sub>N<sub>3</sub>O<sub>4</sub> [M+H]<sup>+</sup> : 432.1923; found: 432.1917.

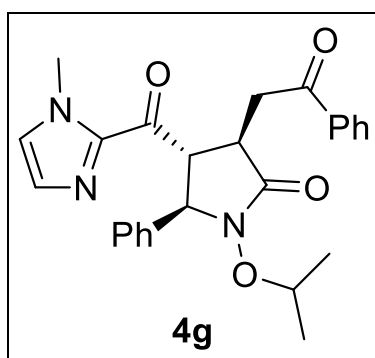

According to the general procedure, **4g** was obtained as white solid (75.7 mg, 85% yield), m.p. 120.5-122.4°C.

Enantiomeric excess was determined by HPLC analysis, ee = 92%, Chiralpak column ADH,  $\lambda$ =254 nm, *n*-hexane/*i*-PrOH=70:30, flow rate: 0.8 mL/min, 25°C,  $t_r$ (minor)=27.387 min,  $t_r$ (major)=20.234 min.

$[\alpha]_D^{20} = +80.7$  (c=0.5, CH<sub>2</sub>Cl<sub>2</sub>);

**<sup>1</sup>H NMR** (400 MHz, CDCl<sub>3</sub>)  $\delta$  7.79 (dd,  $J$  = 8.4, 1.3 Hz, 2H), 7.57 – 7.47 (m, 3H), 7.44 – 7.28 (m, 5H), 6.91 (d,  $J$  = 1.1 Hz, 1H), 6.71 (d,  $J$  = 1.0 Hz, 1H), 5.18 (d,  $J$  = 8.4 Hz, 1H), 4.55 (dd,  $J$  = 9.4, 8.4 Hz, 1H), 4.01 (s, 3H), 3.91 (p,  $J$  = 6.2 Hz, 1H), 3.72 (td,  $J$  = 18.3, 2.8 Hz, 1H), 3.50 (dd,  $J$  = 18.3, 8.8 Hz, 1H), 3.32 (td,  $J$  = 8.9, 2.7 Hz, 1H), 1.22 (d,  $J$  = 6.1 Hz, 3H), 1.00 (d,  $J$  = 6.2 Hz, 3H).

**<sup>13</sup>C NMR** (101 MHz, CDCl<sub>3</sub>) δ 197.48, 189.15, 171.99, 143.20, 137.83, 136.53, 133.01, 129.39, 128.67, 128.61, 128.38, 128.18, 127.92, 127.59, 77.69, 63.74, 52.47, 39.87, 39.30, 36.09, 21.26, 20.75.

**HRMS** (ESI) calcd for C<sub>26</sub>H<sub>28</sub>N<sub>3</sub>O<sub>4</sub> [M+H]<sup>+</sup> : 446.2080; found: 446.2074.

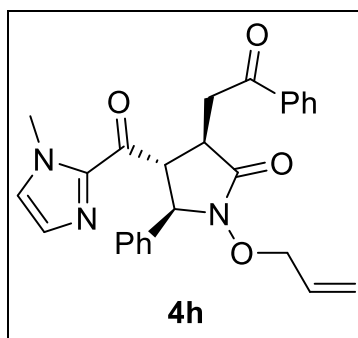

According to the general procedure, **4h** was obtained as white solid (71.8 mg, 81% yield), m.p. 130.8-131.6°C.

Enantiomeric excess was determined by HPLC analysis, ee = 90%, Chiralpak column ADH, λ=254 nm, *n*-hexane/*i*-PrOH=70:30, flow rate: 0.8 mL/min, 25°C, *t<sub>r</sub>*(minor)=29.316 min, *t<sub>r</sub>*(major)=34.337 min.

[α]<sub>D</sub><sup>20</sup> = +65.3 (c=1.0, CH<sub>2</sub>Cl<sub>2</sub>);

**<sup>1</sup>H NMR** (400 MHz, CDCl<sub>3</sub>) δ 7.80 – 7.76 (m, 2H), 7.55 – 7.47 (m, 3H), 7.43 – 7.28 (m, 5H), 6.89 (s, 1H), 6.67 (d, *J* = 0.9 Hz, 1H), 5.92 – 5.77 (m, 1H), 5.27 – 5.18 (m, 3H), 4.49 (dd, *J* = 9.7, 8.6 Hz, 1H), 4.41 (ddt, *J* = 11.5, 6.9, 1.1 Hz, 1H), 4.21 (ddt, *J* = 11.5, 6.2, 1.2 Hz, 1H), 4.01 (s, 3H), 3.79 – 3.67 (m, 1H), 3.52 (dd, *J* = 18.4, 8.8 Hz, 1H), 3.36 – 3.28 (m, 1H)

**<sup>13</sup>C NMR** (101 MHz, CDCl<sub>3</sub>) δ 197.38, 188.84, 171.29, 143.26, 137.54, 136.47, 133.03, 132.17, 129.38, 128.73, 128.69, 128.38, 128.06, 127.90, 127.56, 120.55, 76.55, 63.15, 52.97, 39.96, 39.25, 36.07.

**HRMS** (ESI) calcd for C<sub>26</sub>H<sub>26</sub>N<sub>3</sub>O<sub>4</sub> [M+H]<sup>+</sup> : 444.1923; found: 444.1927.



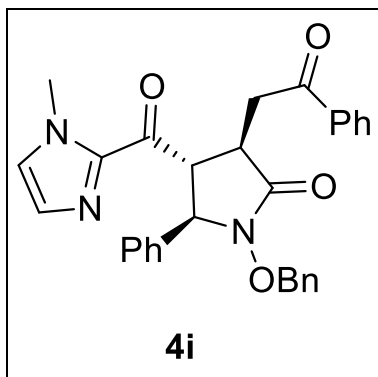

According to the general procedure, **4i** was obtained as white solid (71.1 mg, 72% yield), m.p. 182.6-183.4°C.

Enantiomeric excess was determined by HPLC analysis, ee = 82%, Chiralpak column ADH,  $\lambda$ =254 nm, *n*-hexane/*i*-PrOH=70:30, flow rate: 0.8 mL/min, 25°C,  $t_r$ (minor)=68.919 min,  $t_r$ (major)=53.030 min.

$[\alpha]_D^{20}$ =+68.3 (c=1.0, CH<sub>2</sub>Cl<sub>2</sub>);

**<sup>1</sup>H NMR** (400 MHz, CDCl<sub>3</sub>)  $\delta$  7.82 – 7.78 (m, 2H), 7.55 – 7.50 (m, 1H), 7.49 – 7.45 (m, 2H), 7.43 – 7.37 (m, 2H), 7.36 – 7.31 (m, 3H), 7.31 – 7.26 (m, 3H), 7.18 – 7.14 (m, 2H), 6.88 (s, 1H), 6.67 (s, 1H), 5.08 (dd,  $J$  = 9.3, 8.0 Hz, 2H), 4.67 (d,  $J$  = 9.9 Hz, 1H), 4.50 (dd,  $J$  = 9.7, 8.6 Hz, 1H), 4.00 (s, 3H), 3.75 (dd,  $J$  = 18.4, 2.7 Hz, 1H), 3.53 (dd,  $J$  = 18.4, 8.7 Hz, 1H), 3.35 – 3.28 (m, 1H).

**<sup>13</sup>C NMR** (101 MHz, CDCl<sub>3</sub>)  $\delta$  197.42, 188.75, 171.15, 143.23, 137.58, 136.50, 134.79, 133.03, 129.48, 129.36, 128.75, 128.67, 128.39, 128.35, 128.14, 127.93, 127.51, 77.64, 63.30, 52.98, 39.98, 39.16, 36.07.

**HRMS** (ESI) calcd for C<sub>30</sub>H<sub>28</sub>N<sub>3</sub>O<sub>4</sub> [M+H]<sup>+</sup> : 494.2080; found: 494.2076.

## 5. Synthetic Transformation

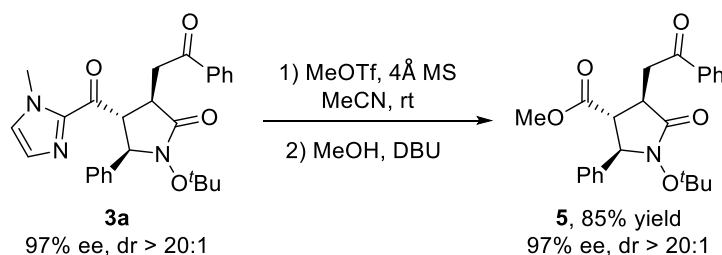

4 Å MS (100 mg) was added to a solution of **3a** (46.0 mg, 0.1 mmol) in dry CH<sub>3</sub>CN (1.0 mL) under argon atmosphere. The suspension was stirred vigorously under a positive pressure of argon for 2 hours at 25°C. Then methyl trifluoromethanesulfonate (45.3 μL, 0.4 mmol, 4.0 eq.) was added. After being stirred at 25°C for 12 hours, MeOH (0.55 mL) and DBU (22.4 μL, 0.15 mmol, 1.5 eq.) were subsequently added. After being stirred at 25°C for 30 min, the reaction mixture was concentrated and the residue was subjected to a silica gel flash chromatography (petroleum ether/ EtOAc = 10:1 to 4:1) to afford product **5** as colorless oil (33.6 mg, 85% yield).

Enantiomeric excess was determined by HPLC analysis, ee = 97%, Chiralpak column ADH, λ = 254 nm, *n*-hexane/*i*-PrOH = 70:30, flow rate: 0.8 mL/min, 25°C, *t<sub>r</sub>*(major) = 47.760 min, *t<sub>r</sub>*(minor) = 56.418 min. [α]<sub>D</sub><sup>20</sup> = +73.2 (c=0.5, CH<sub>2</sub>Cl<sub>2</sub>).

**<sup>1</sup>H NMR** (400 MHz, CDCl<sub>3</sub>) δ 7.94 – 7.89 (m, 2H), 7.55 (t, *J* = 7.4 Hz, 1H), 7.43 (t, *J* = 7.7 Hz, 2H), 7.39 – 7.29 (m, 5H), 5.04 (d, *J* = 6.4 Hz, 1H), 3.74 – 3.64 (m, 4H), 3.37 (td, *J* = 8.3, 3.1 Hz, 1H), 3.22 (dd, *J* = 18.0, 8.4 Hz, 1H), 3.09 – 3.04 (m, 1H), 1.19 (s, 9H).

**<sup>13</sup>C NMR** (101 MHz, CDCl<sub>3</sub>) δ 197.09, 172.53, 172.39, 138.66, 136.39, 133.39, 128.74, 128.64, 128.42, 128.06, 127.67, 84.70, 65.66, 52.53, 51.02, 38.85, 37.83, 27.66, 27.61.

**HRMS** (ESI) calcd for C<sub>24</sub>H<sub>28</sub>NO<sub>5</sub> [M+H]<sup>+</sup> : 410.2080; found: 410.2084.

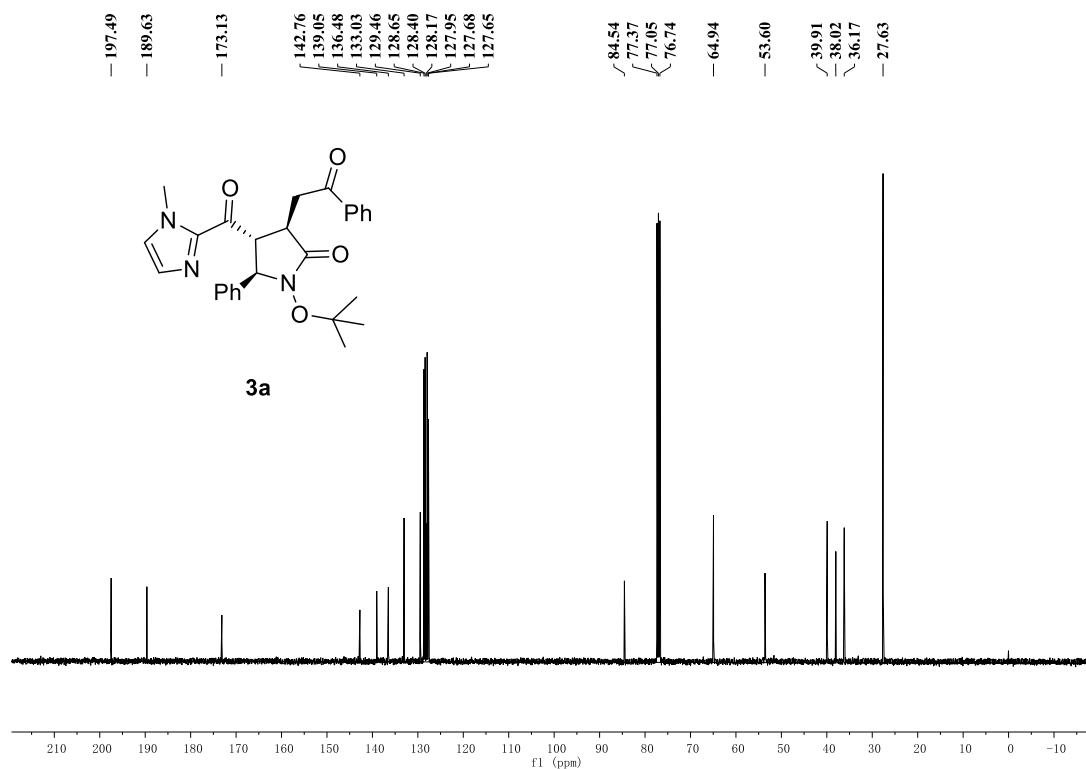

**Figure S1.**  $^1\text{H}$  and  $^{13}\text{C}$  NMR spectrum of **3a**.

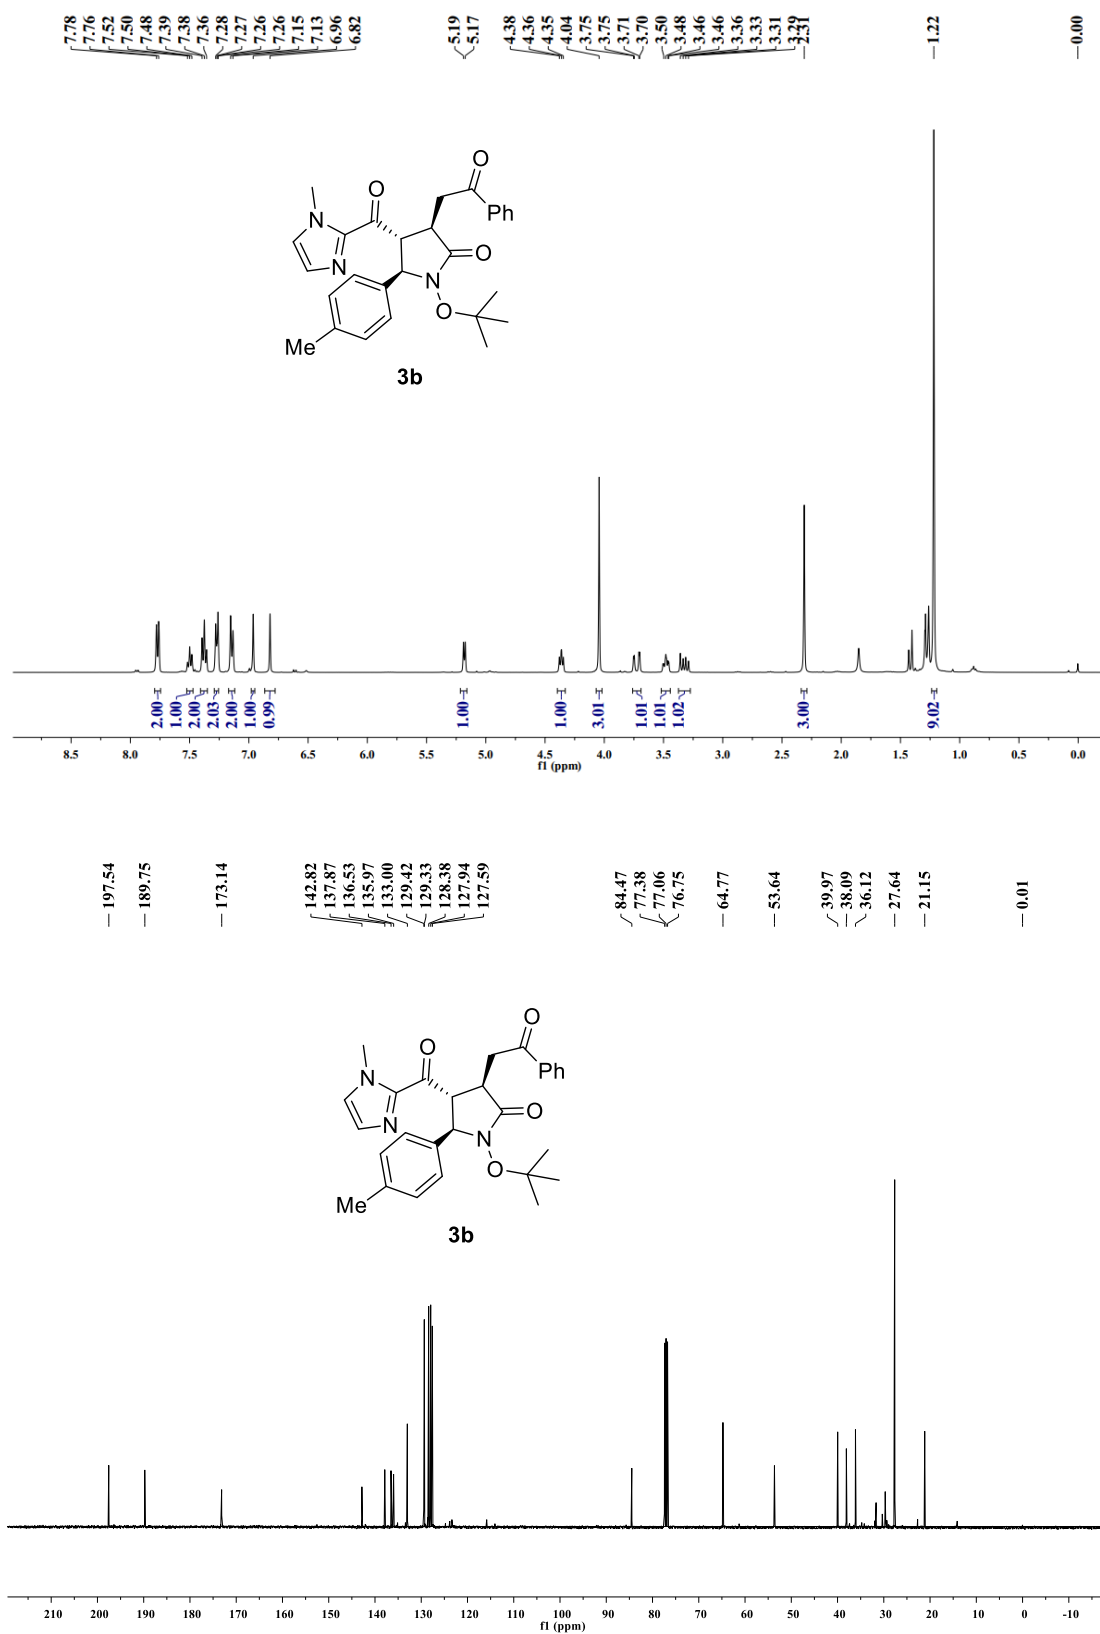

**Figure S2.**  $^1\text{H}$  and  $^{13}\text{C}$  NMR spectrum of **3b**.

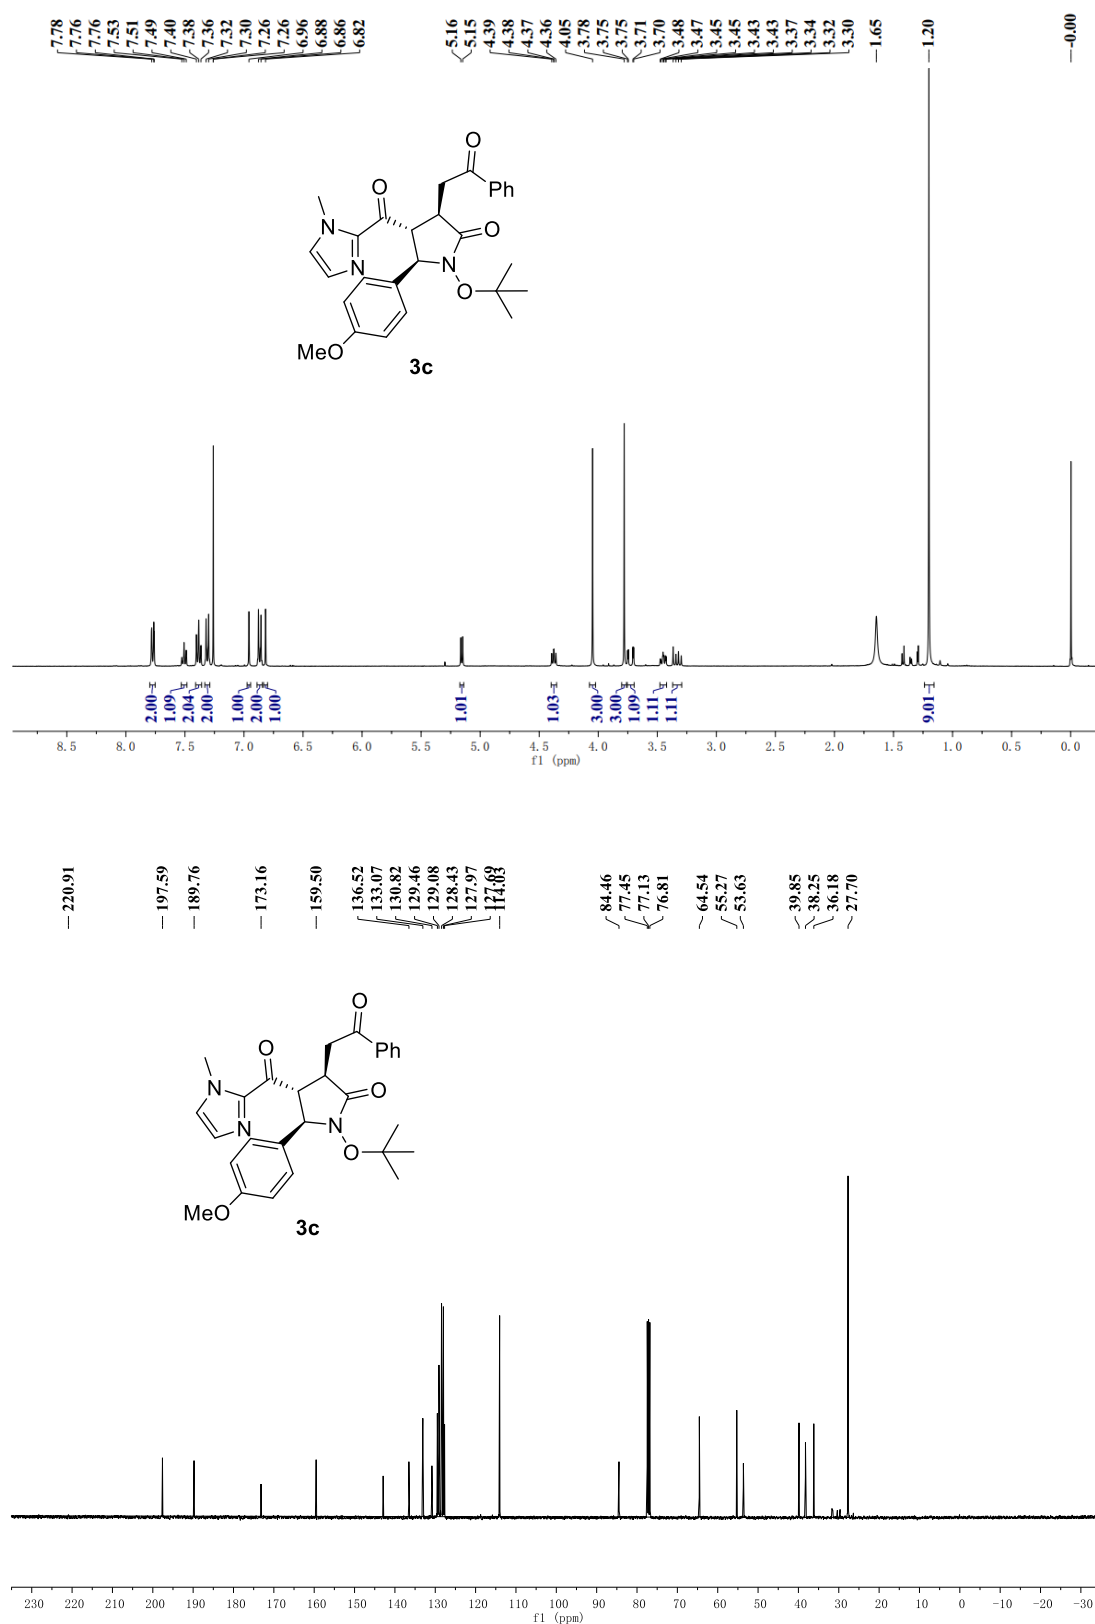

**Figure S3.** <sup>1</sup>H and <sup>13</sup>C NMR spectrum of **3c**.

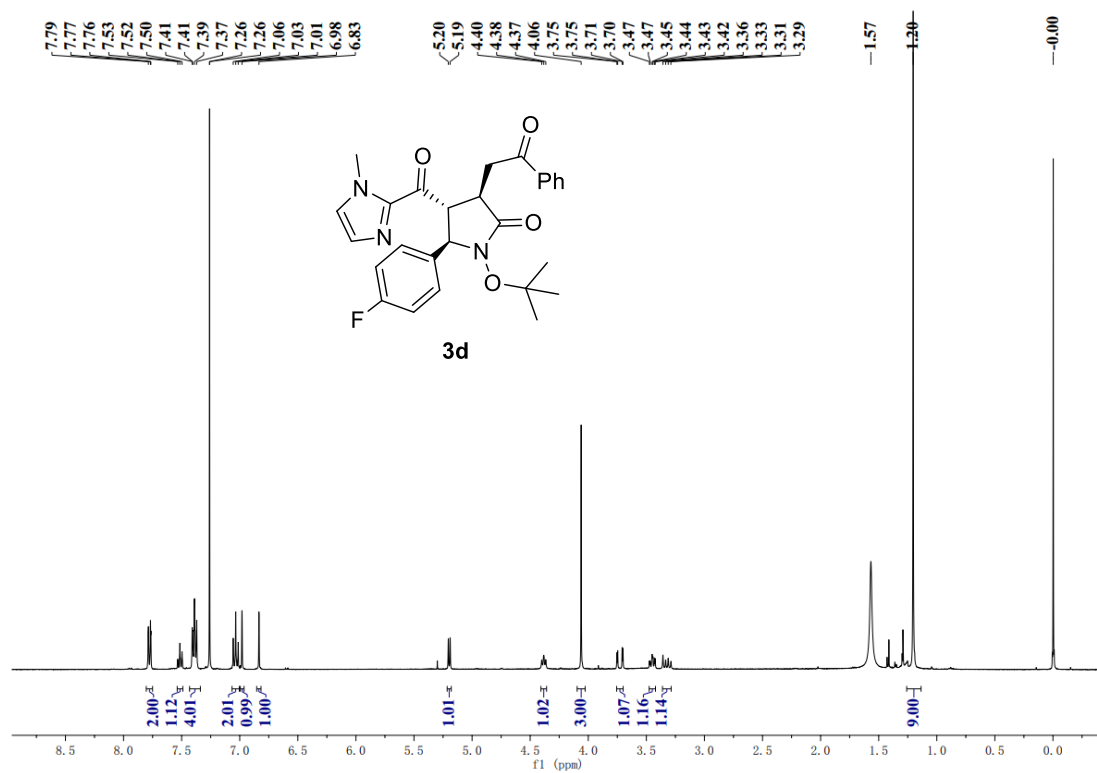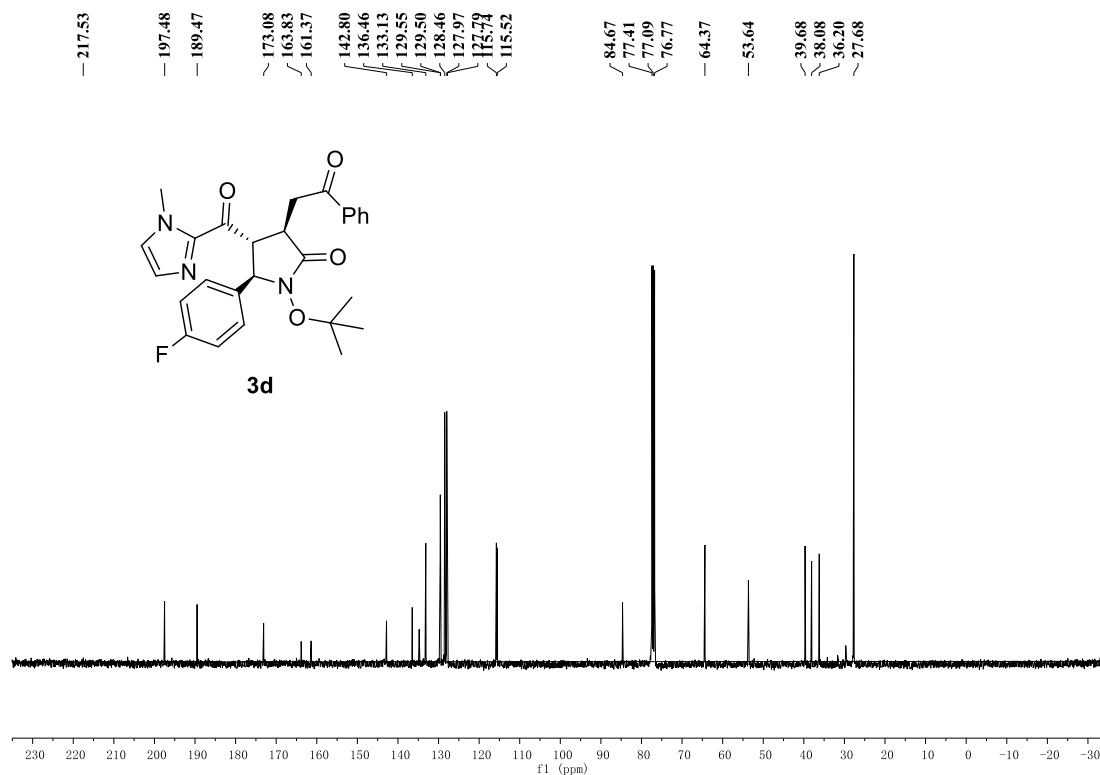

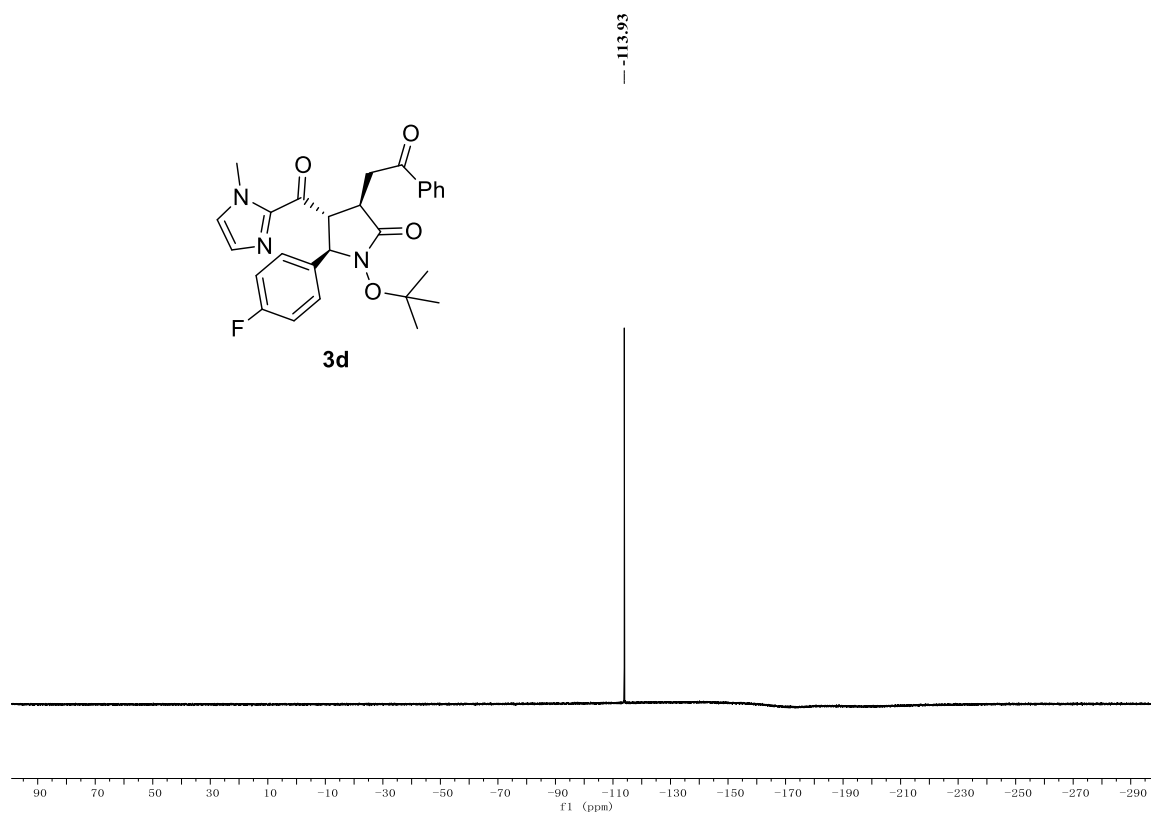

**Figure S4.** <sup>1</sup>H, <sup>13</sup>C and <sup>19</sup>F NMR spectrum of **3d**.

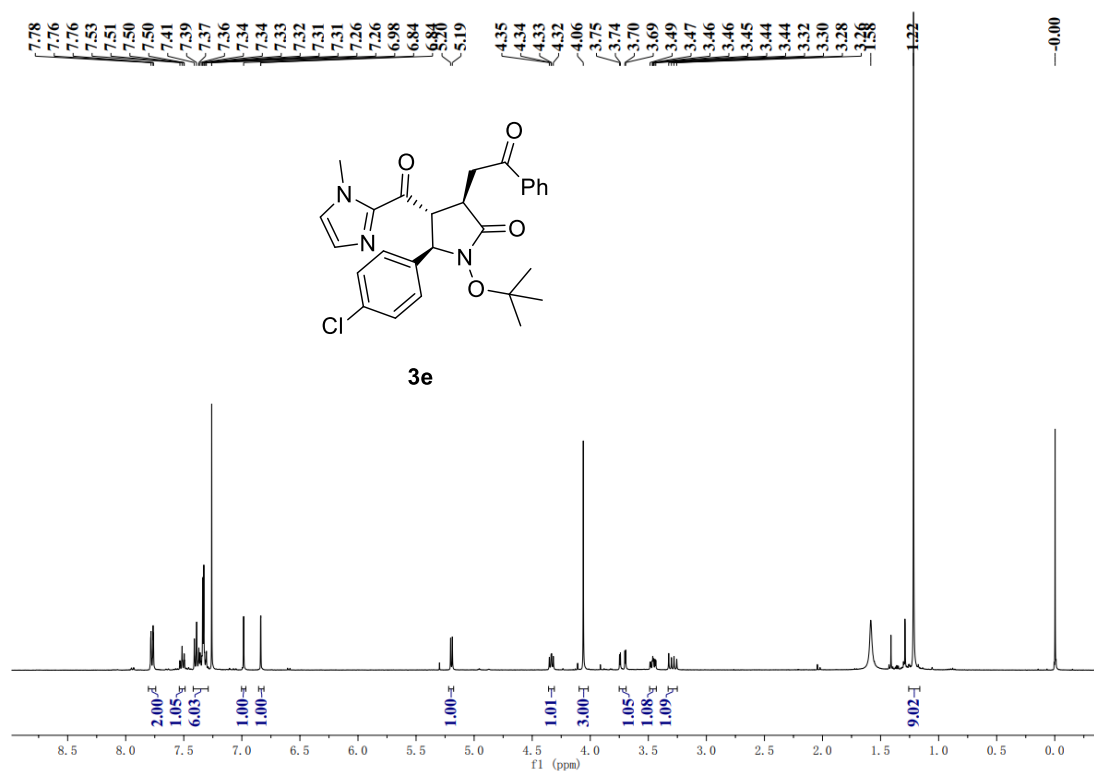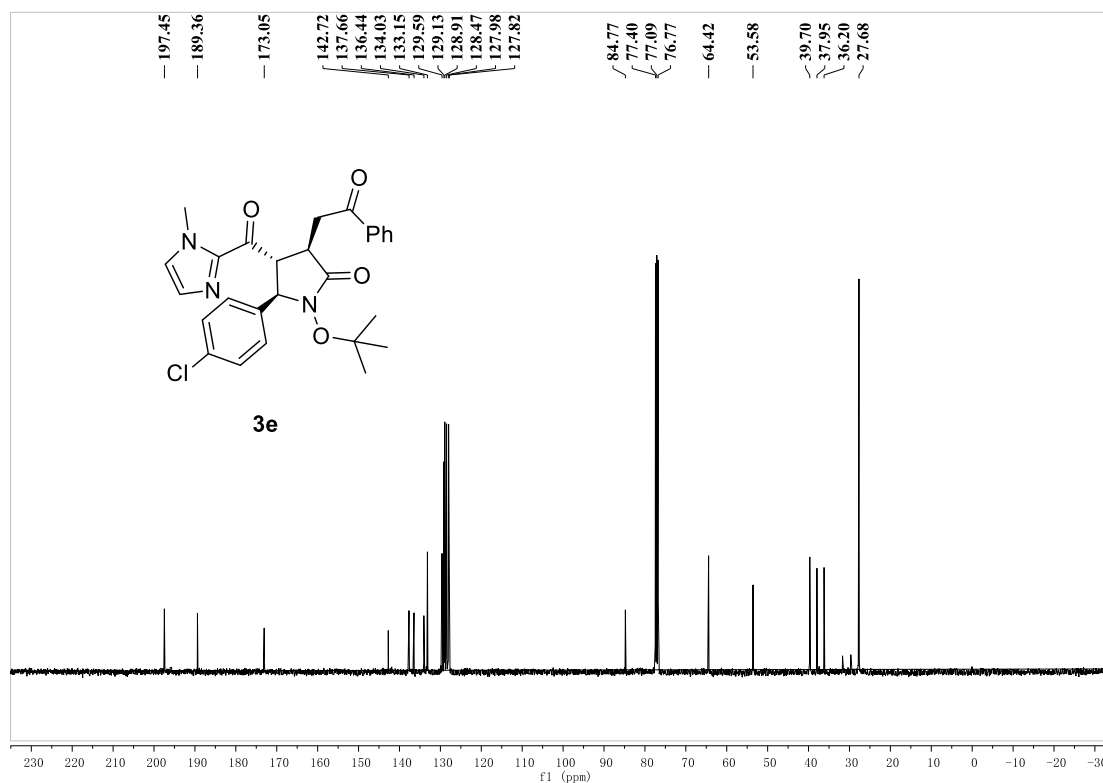

**Figure S5.**  $^1\text{H}$  and  $^{13}\text{C}$  NMR spectrum of **3e**.



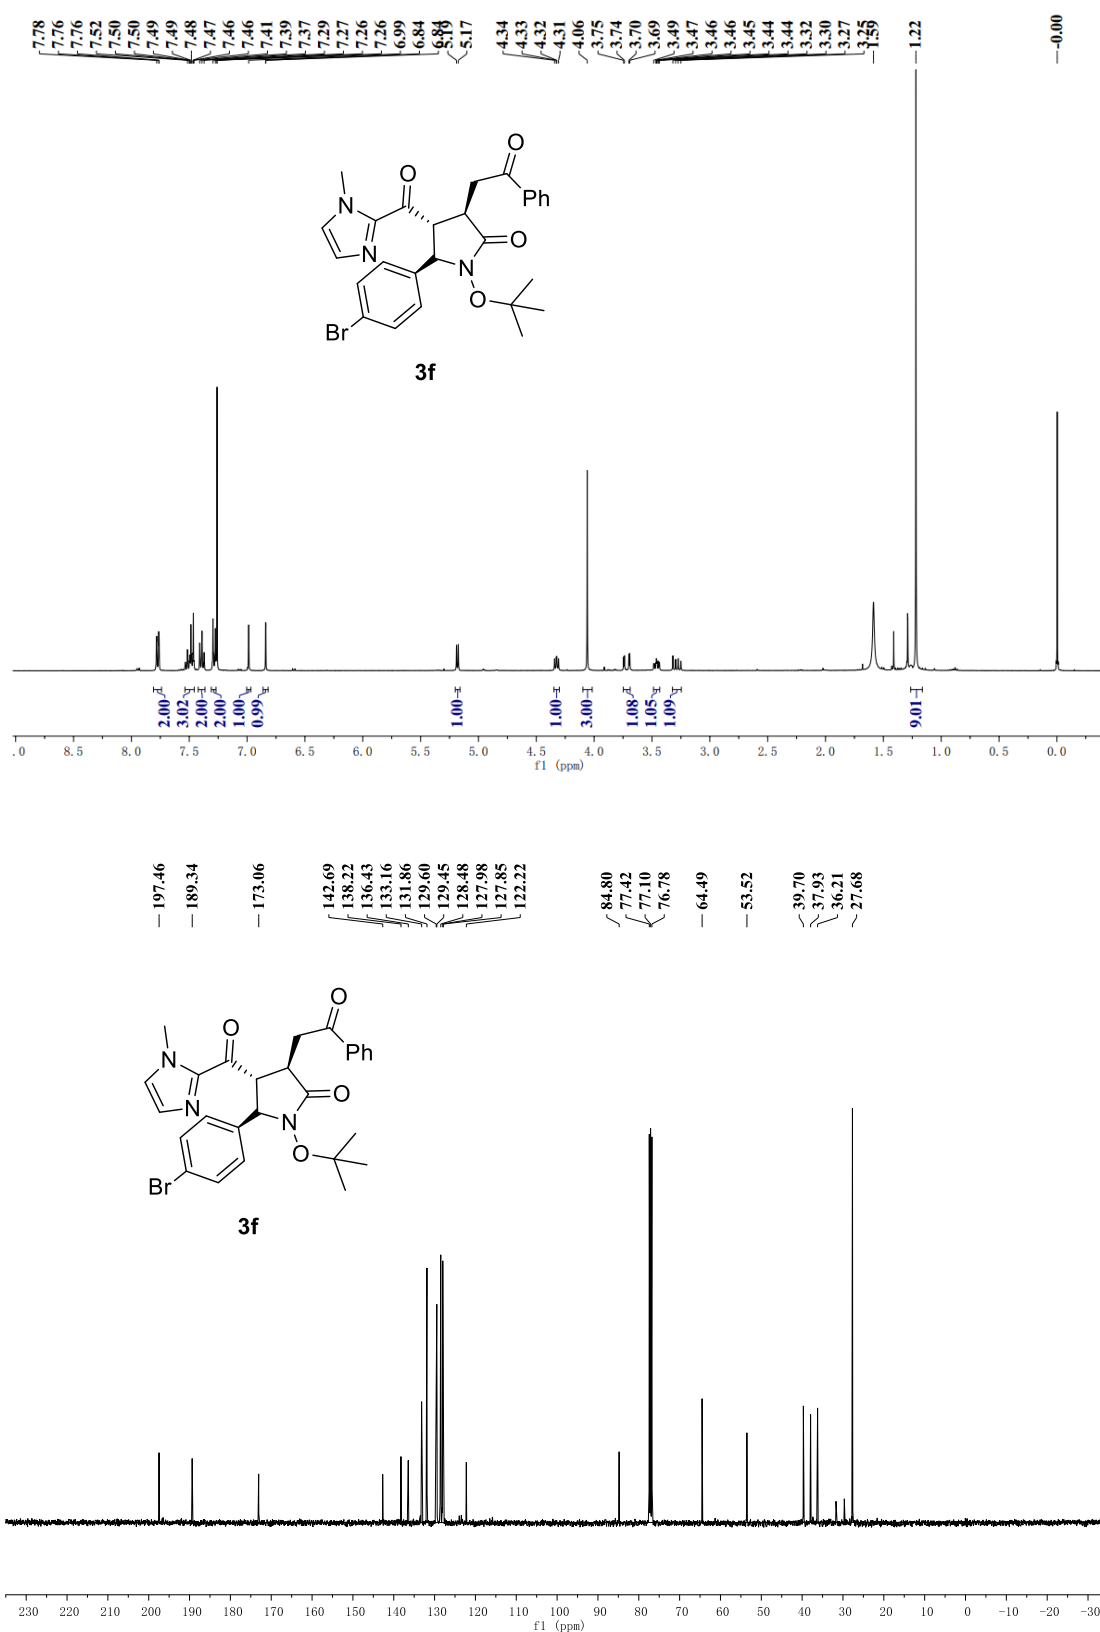

**Figure S6.**  $^1\text{H}$  and  $^{13}\text{C}$  NMR spectrum of **3f**.

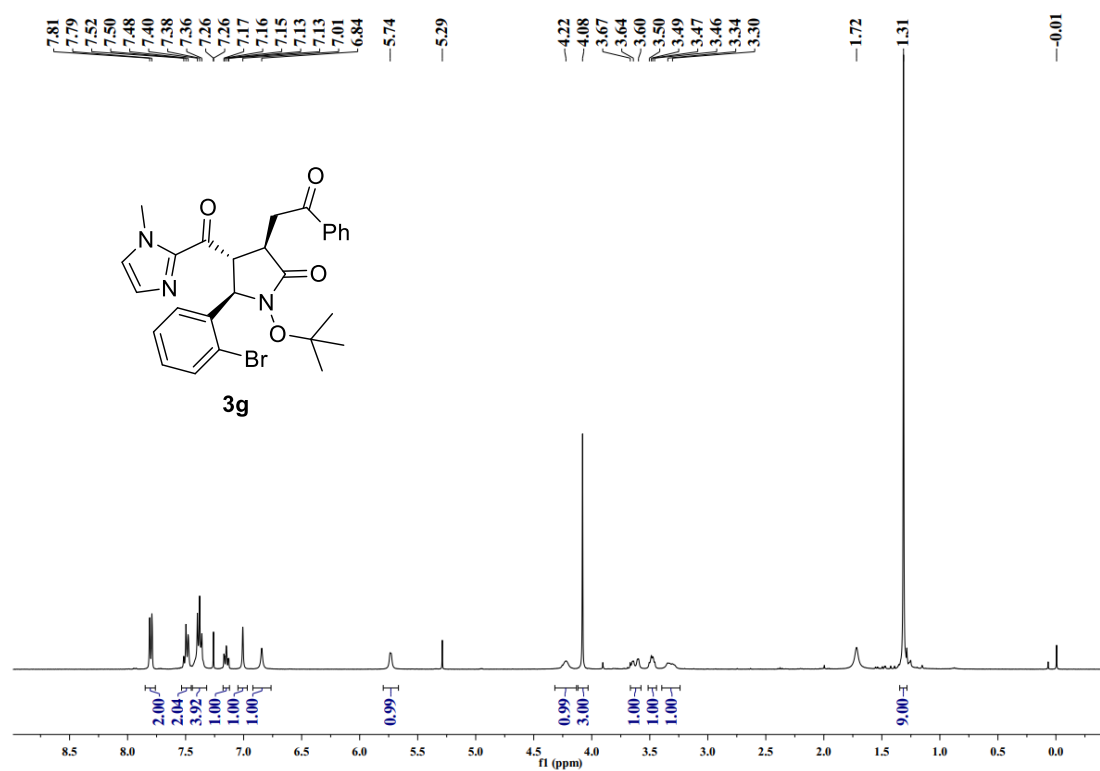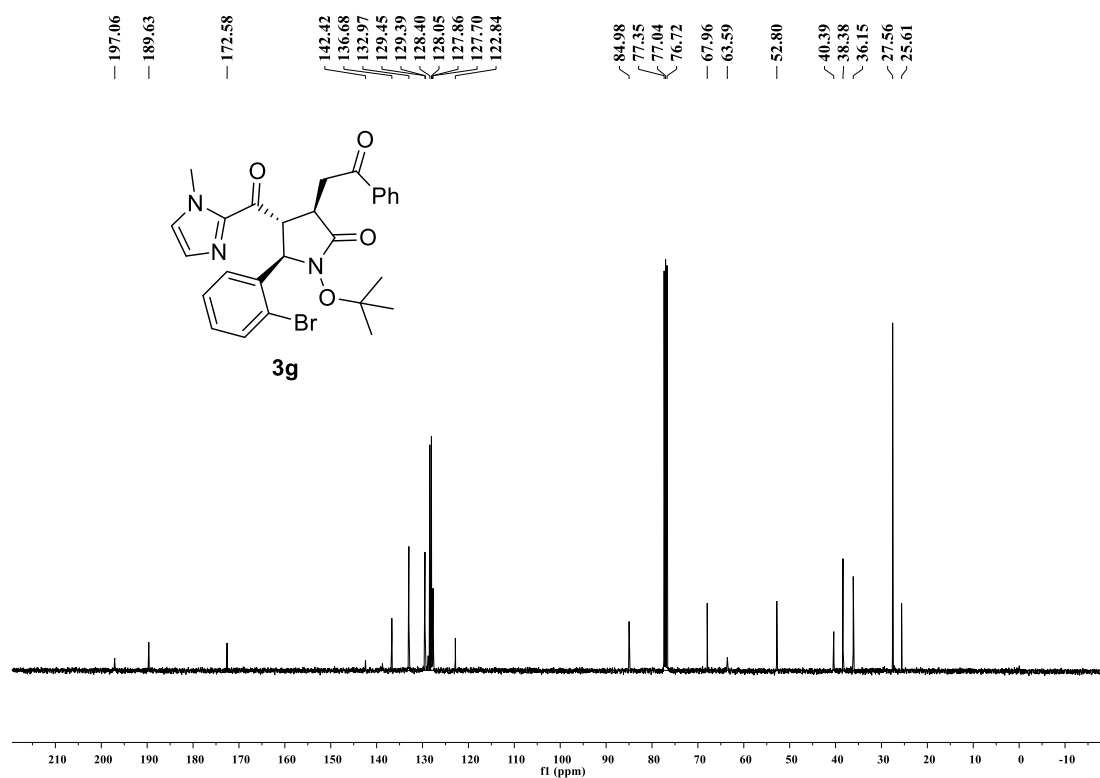

**Figure S7.**  $^1\text{H}$  and  $^{13}\text{C}$  NMR spectrum of **3g**.

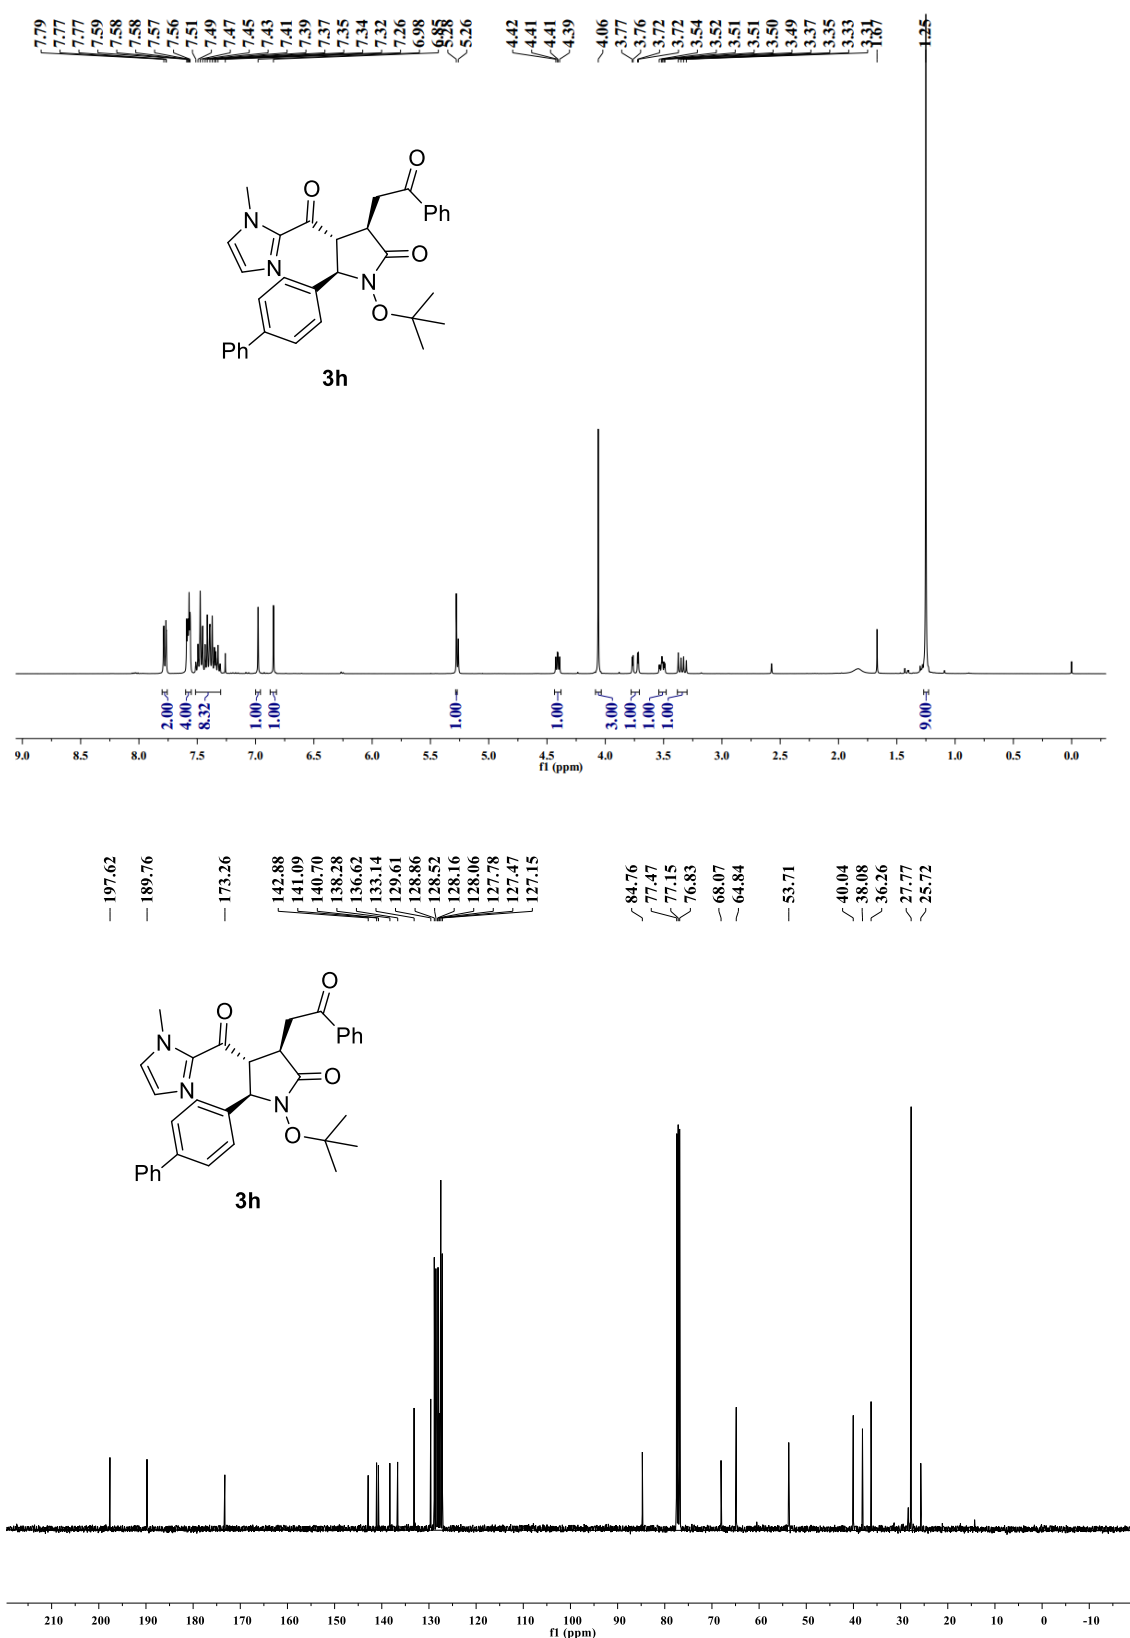

**Figure S8.**  $^1\text{H}$  and  $^{13}\text{C}$  NMR spectrum of **3h**.

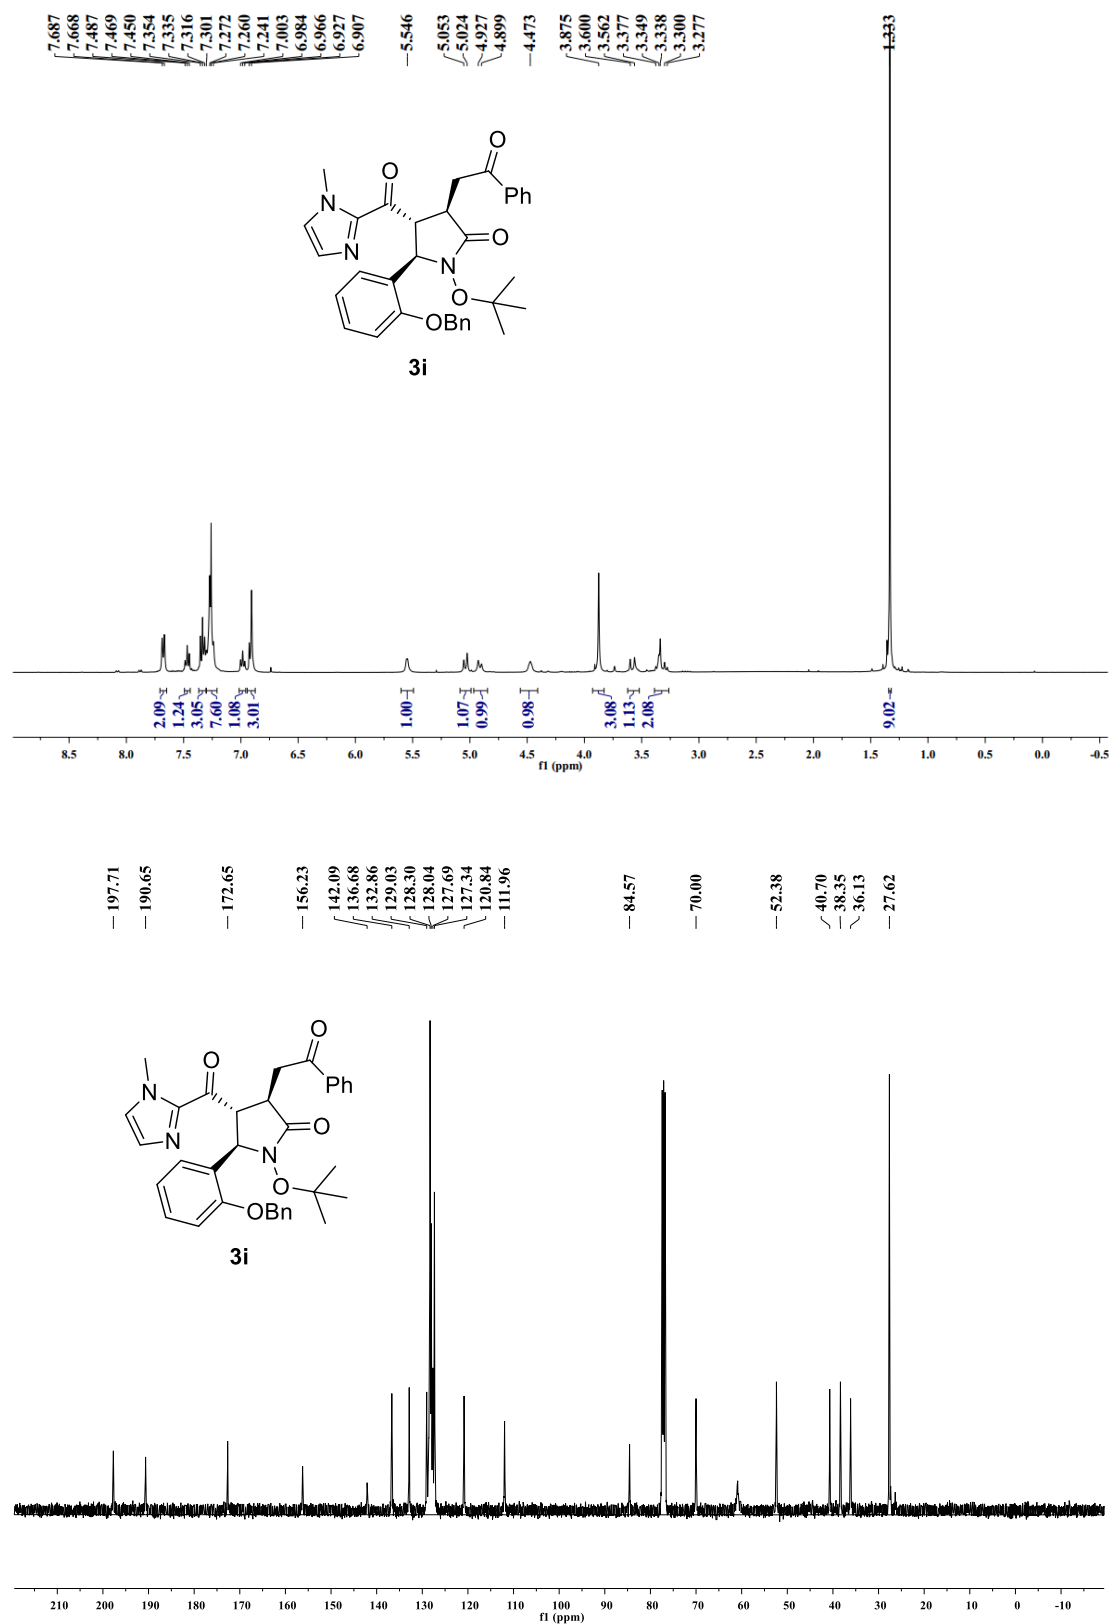

**Figure S9.** <sup>1</sup>H and <sup>13</sup>C NMR spectrum of **3i**.

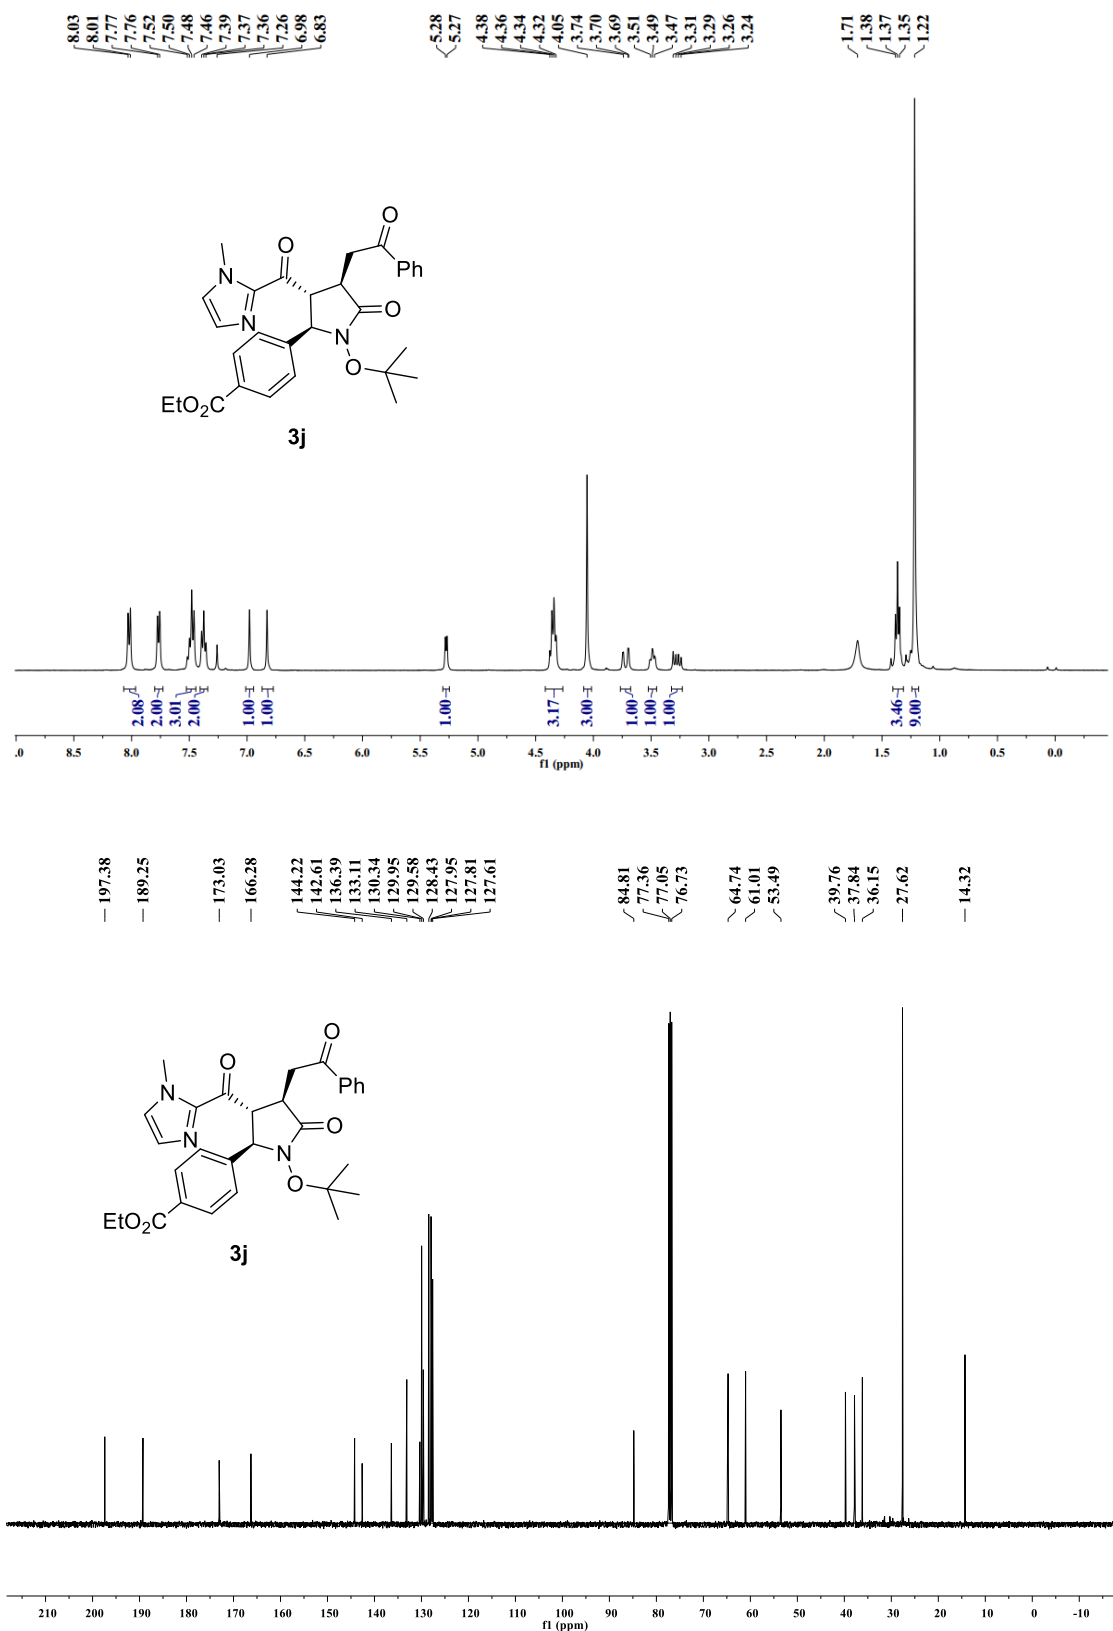

**Figure S10.**  $^1\text{H}$  and  $^{13}\text{C}$  NMR spectrum of **3j**.

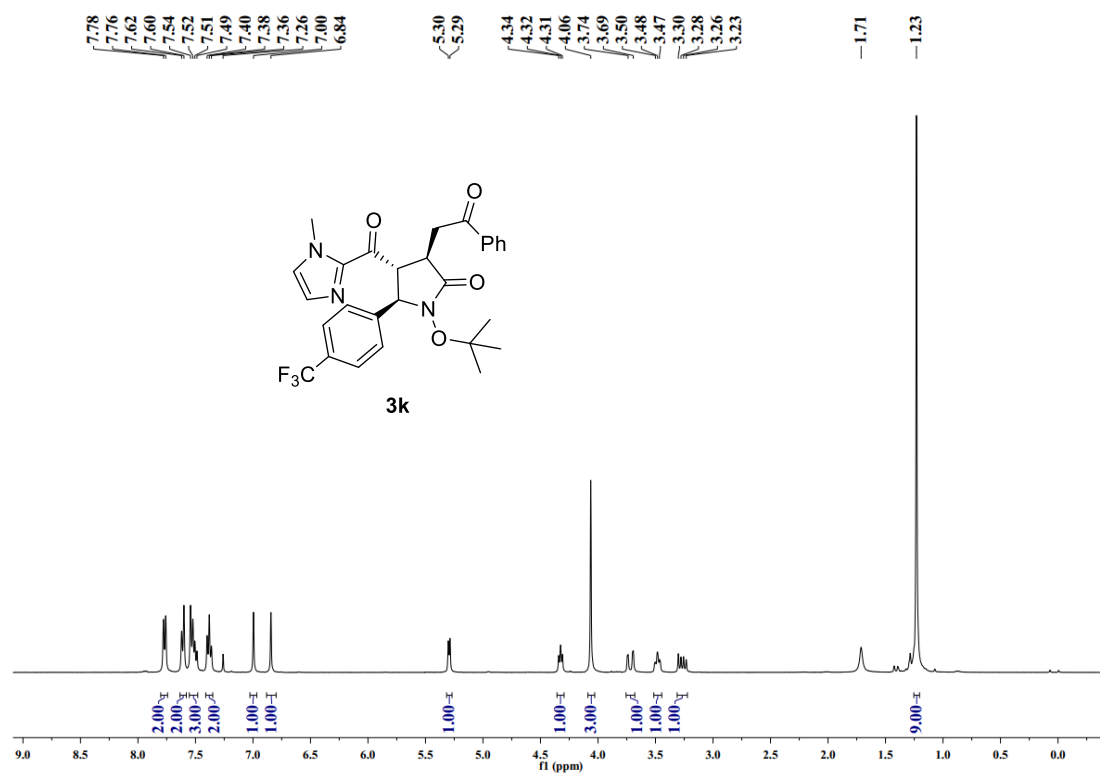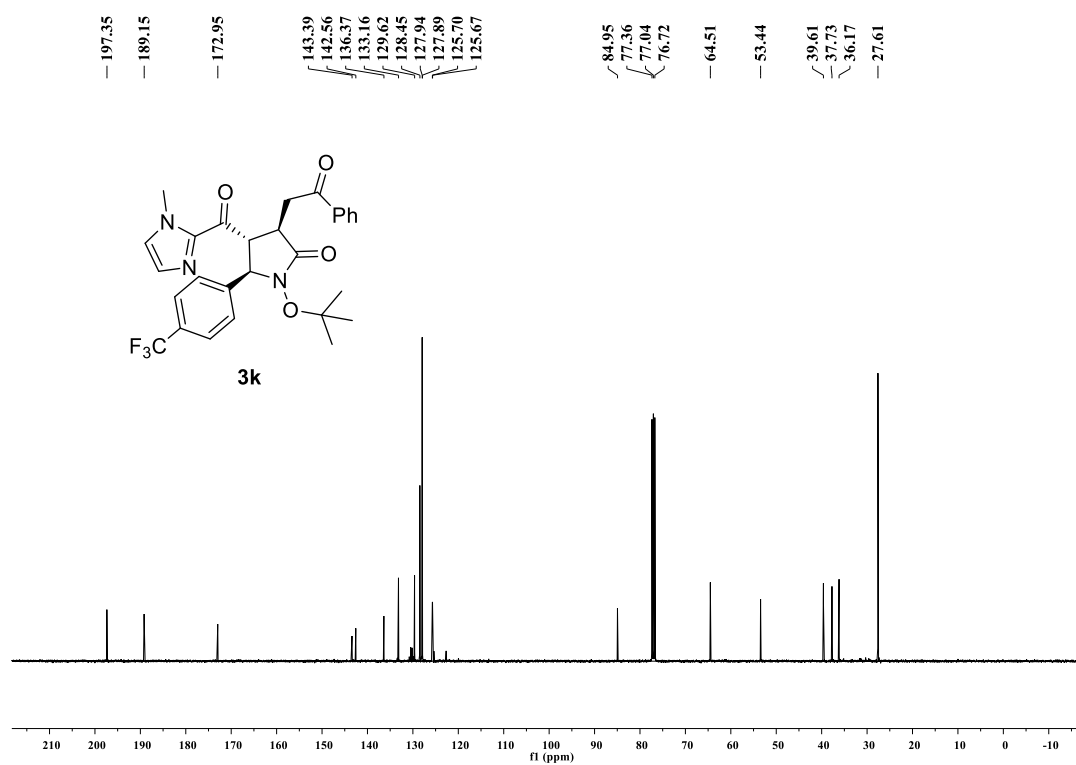

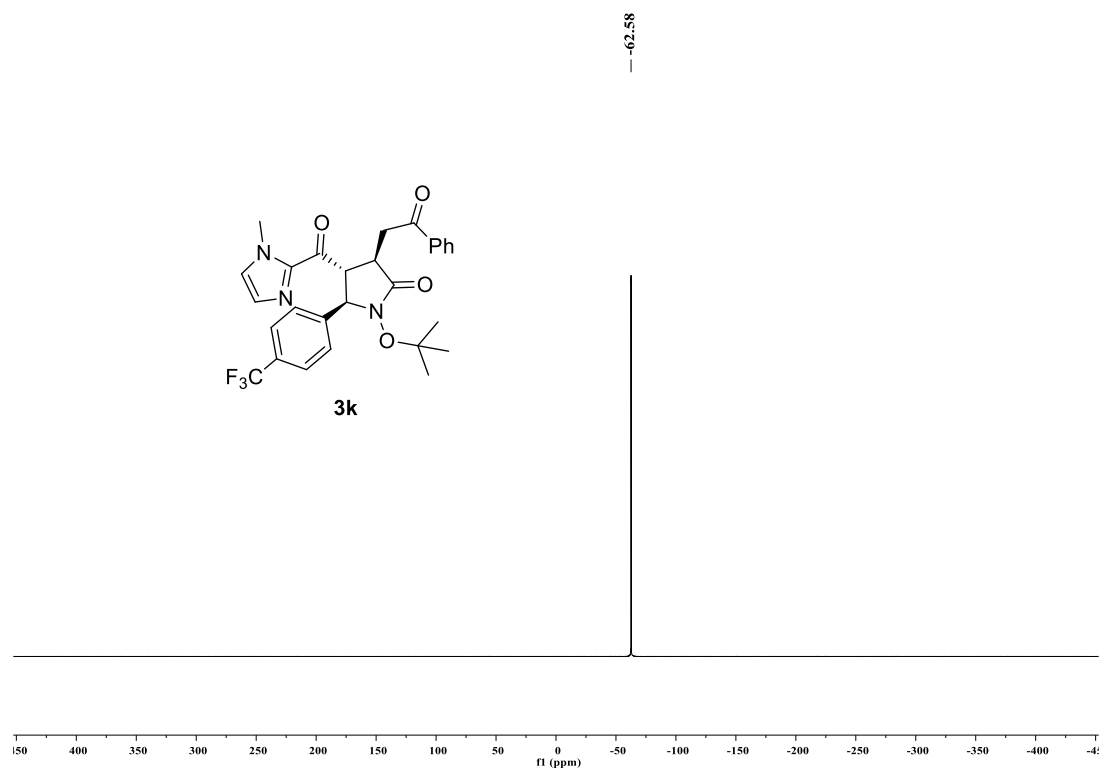

**Figure S11.**  $^1\text{H}$ ,  $^{13}\text{C}$  NMR and  $^{19}\text{F}$  NMR spectrum of **3k**.

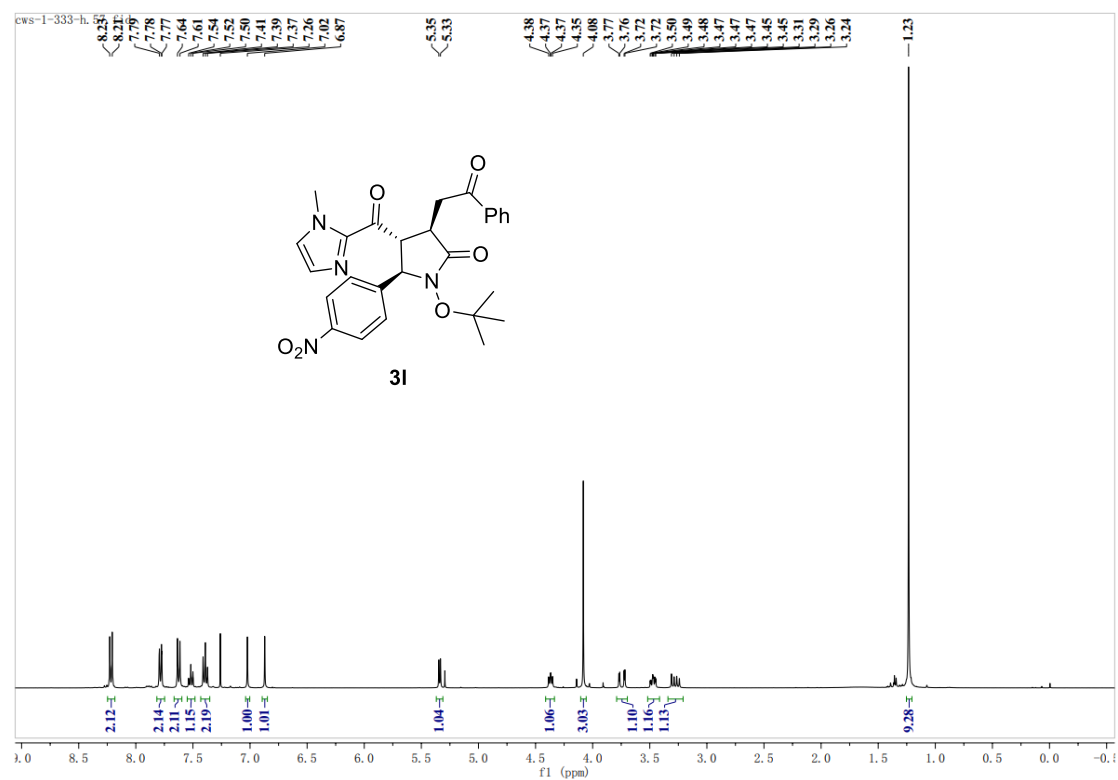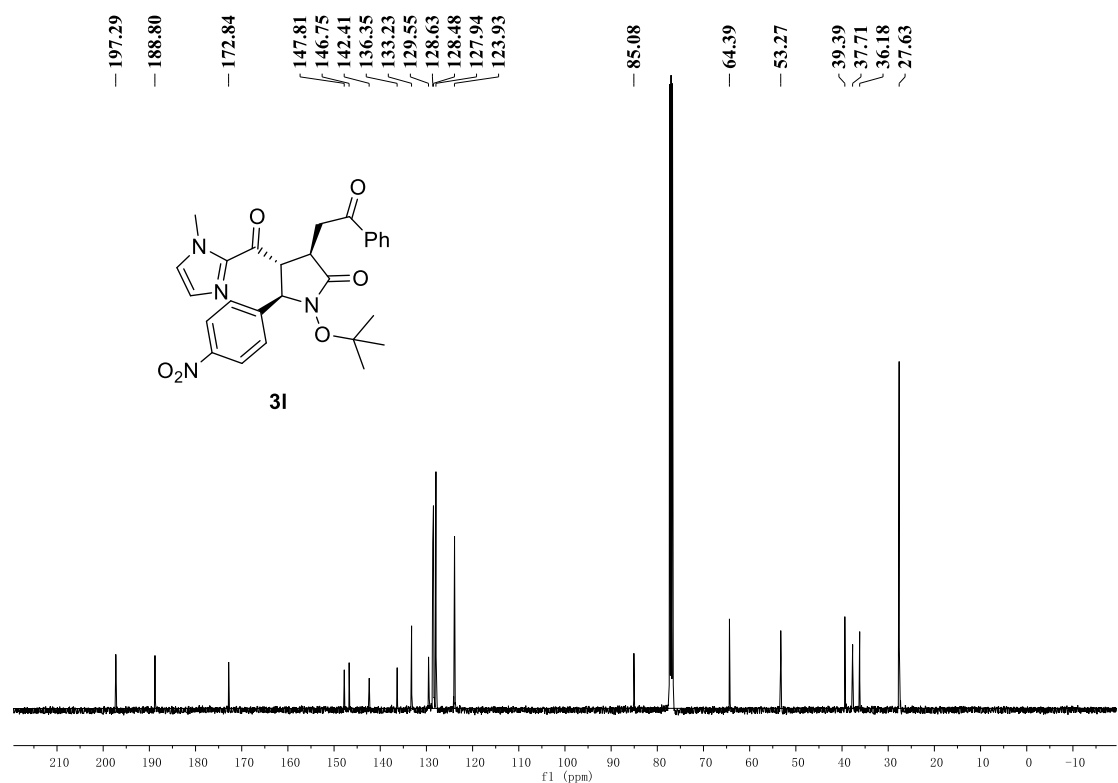

**Figure S12.**  $^1\text{H}$  and  $^{13}\text{C}$  NMR spectrum of **31**.



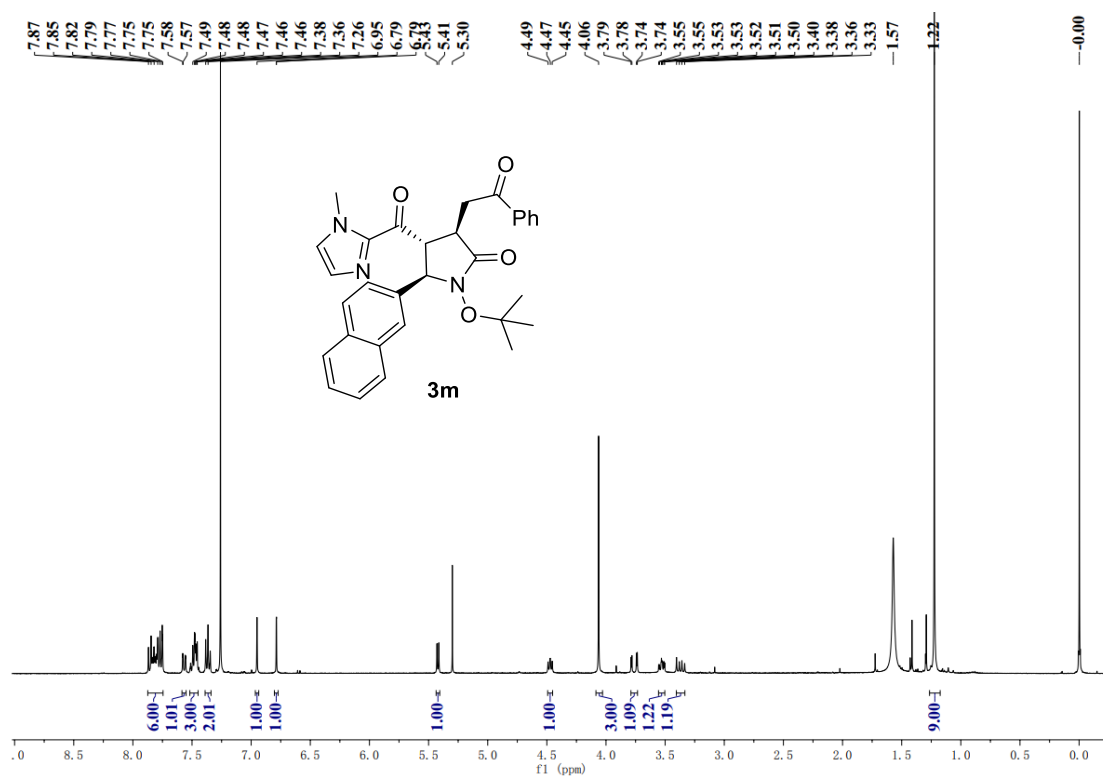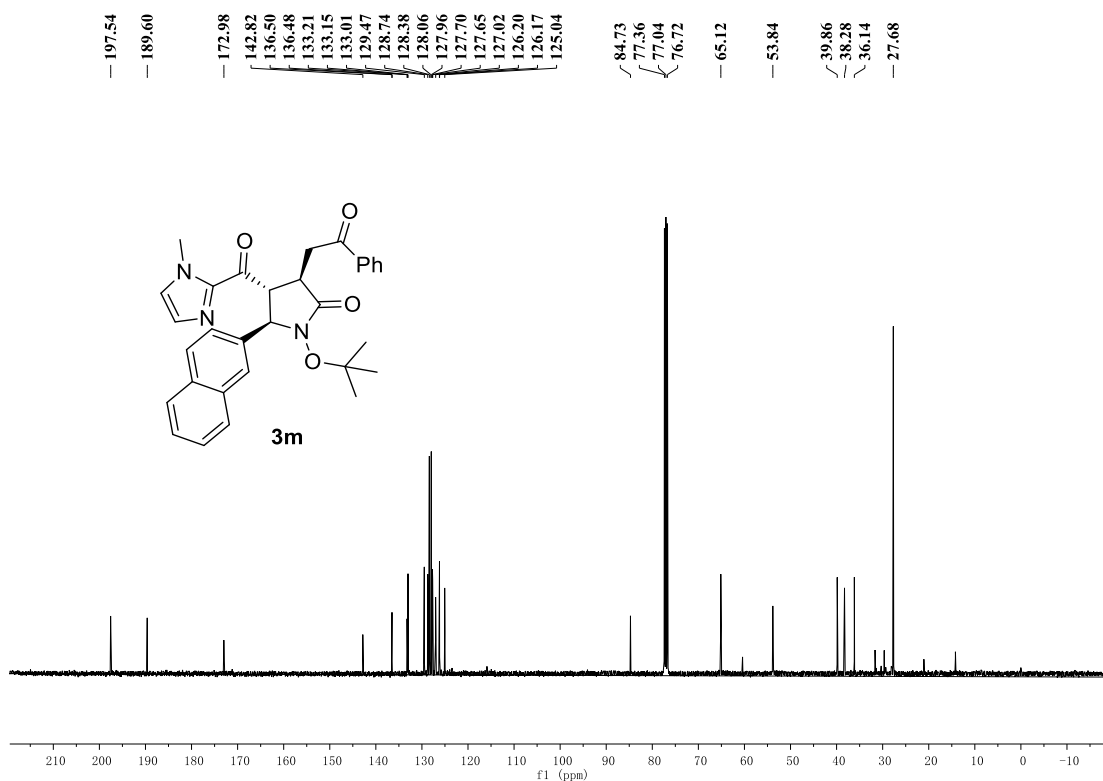

**Figure S13.** <sup>1</sup>H and <sup>13</sup>C NMR spectrum of **3m**.

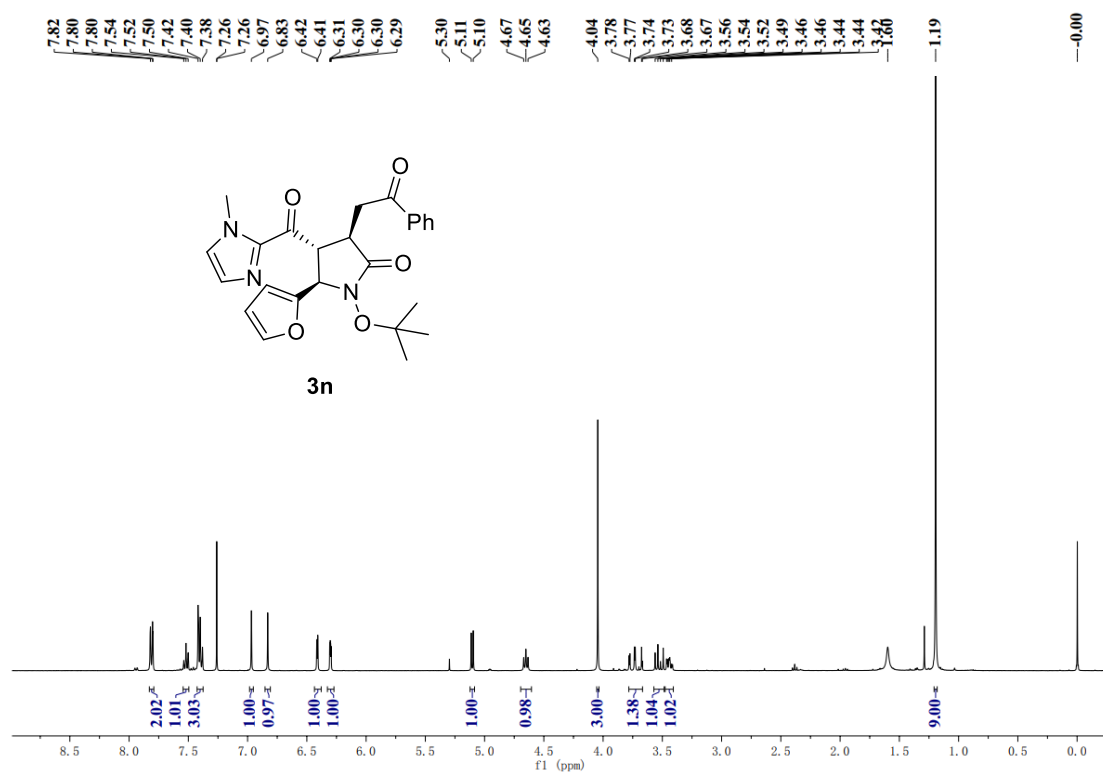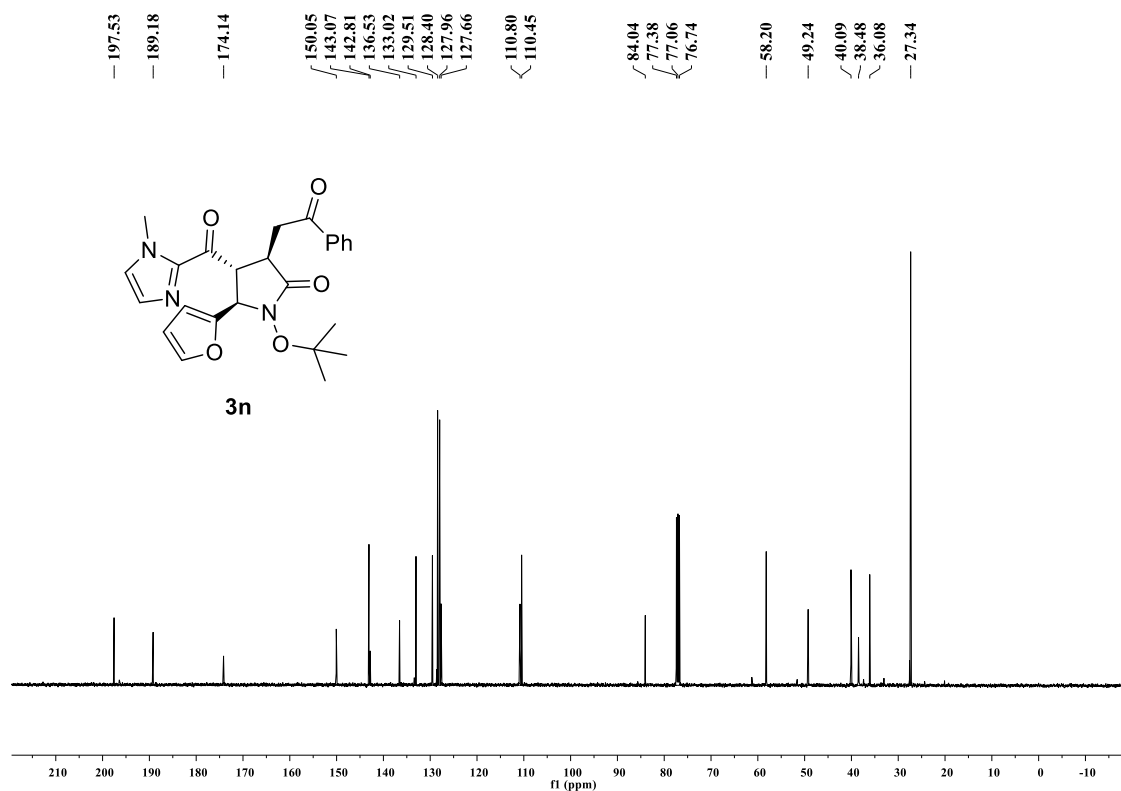

**Figure S14.**  $^1\text{H}$  and  $^{13}\text{C}$  NMR spectrum of **3n**.

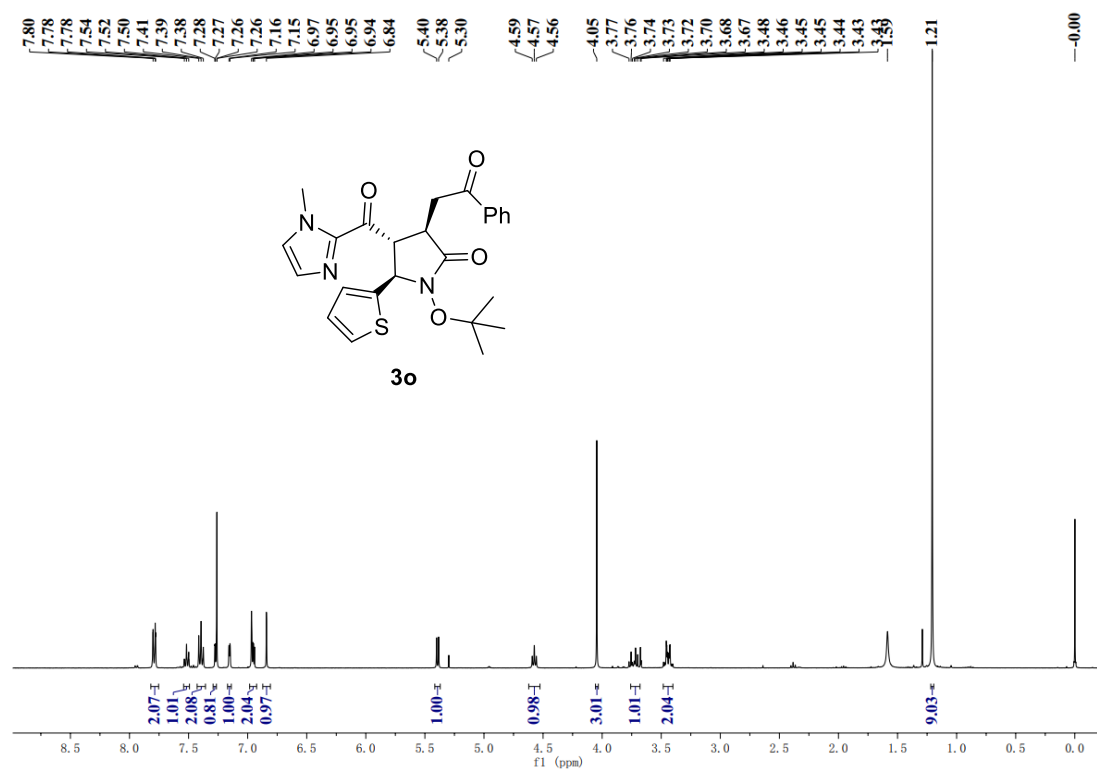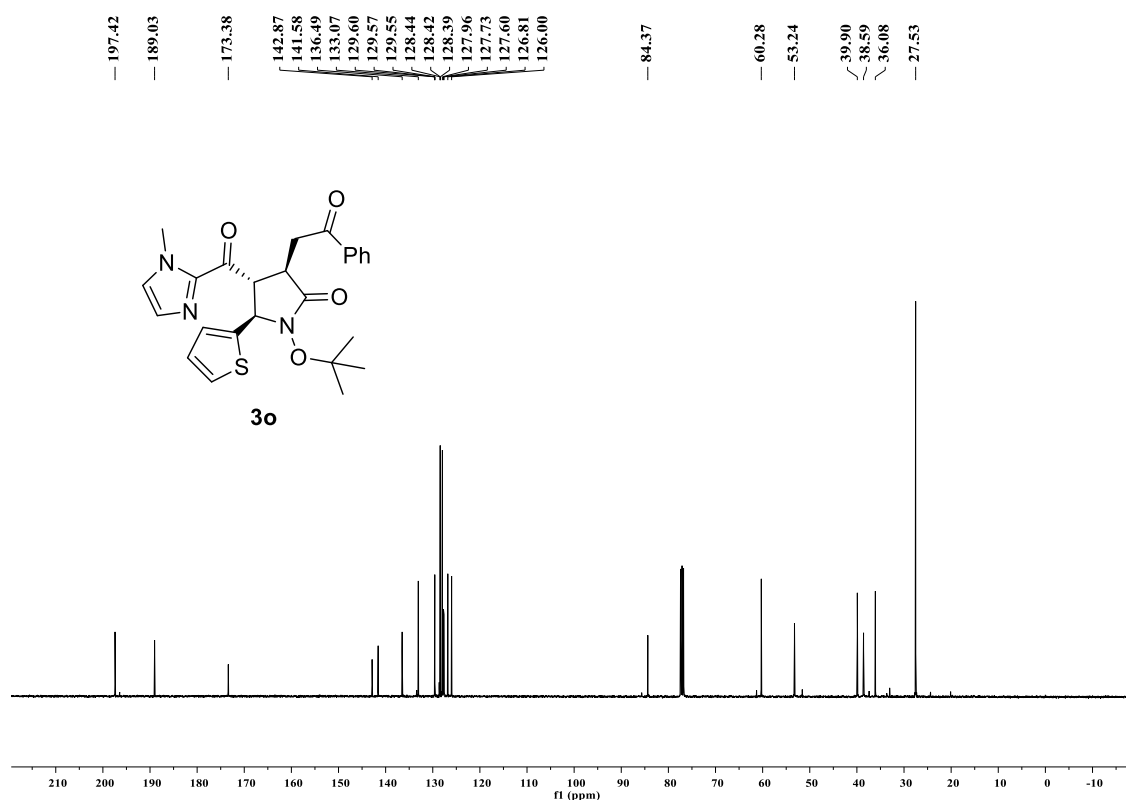

**Figure S15.** <sup>1</sup>H and <sup>13</sup>C NMR spectrum of **3o**.

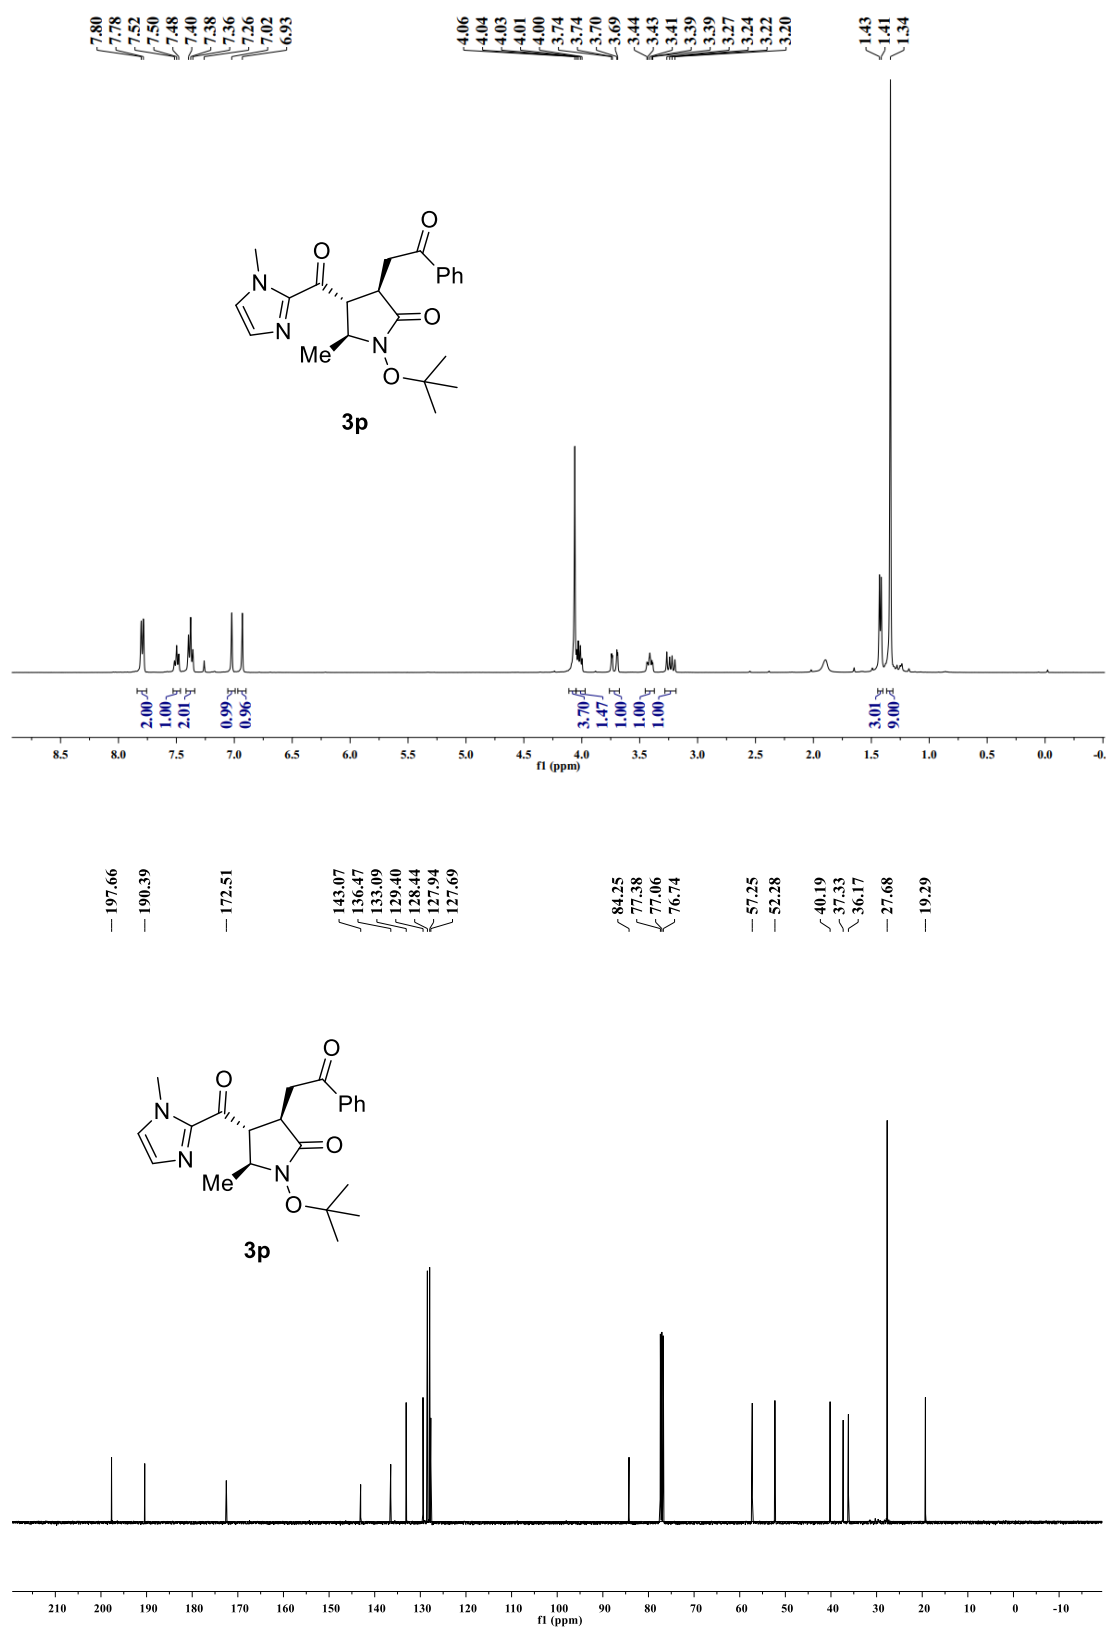

**Figure S16.** <sup>1</sup>H and <sup>13</sup>C NMR spectrum of **3p**.

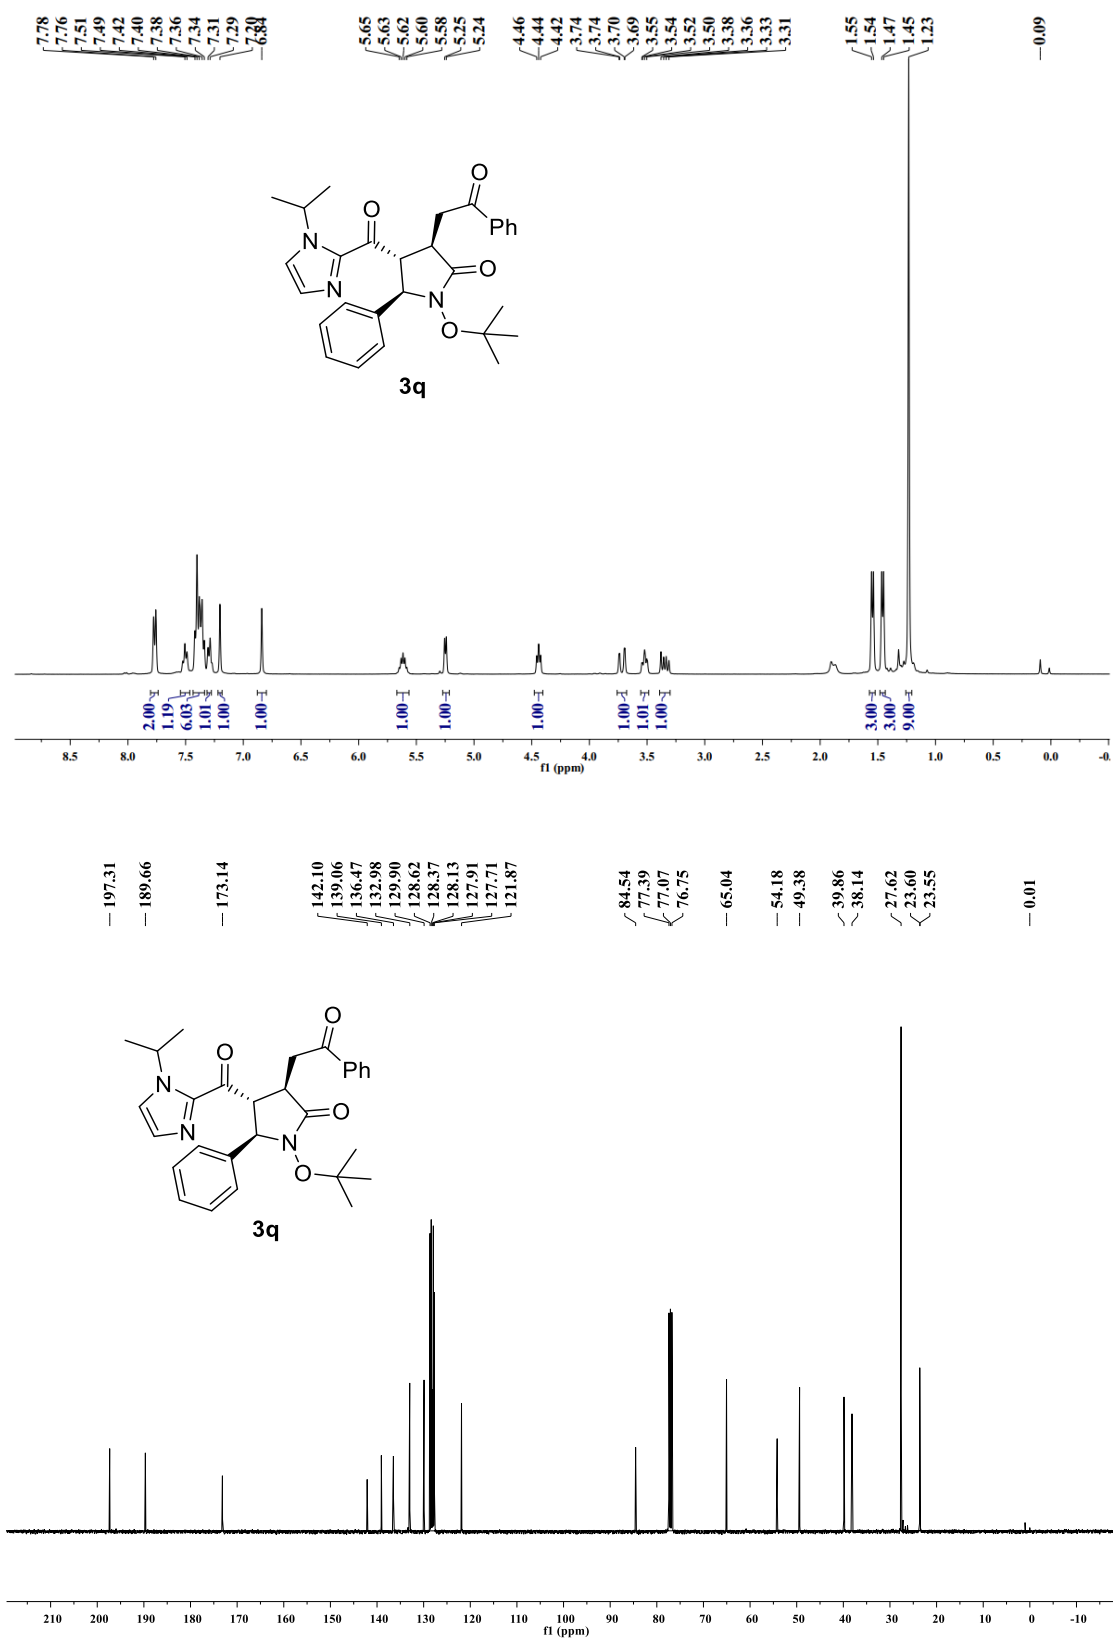

**Figure S17.** <sup>1</sup>H and <sup>13</sup>C NMR spectrum of **3q**.

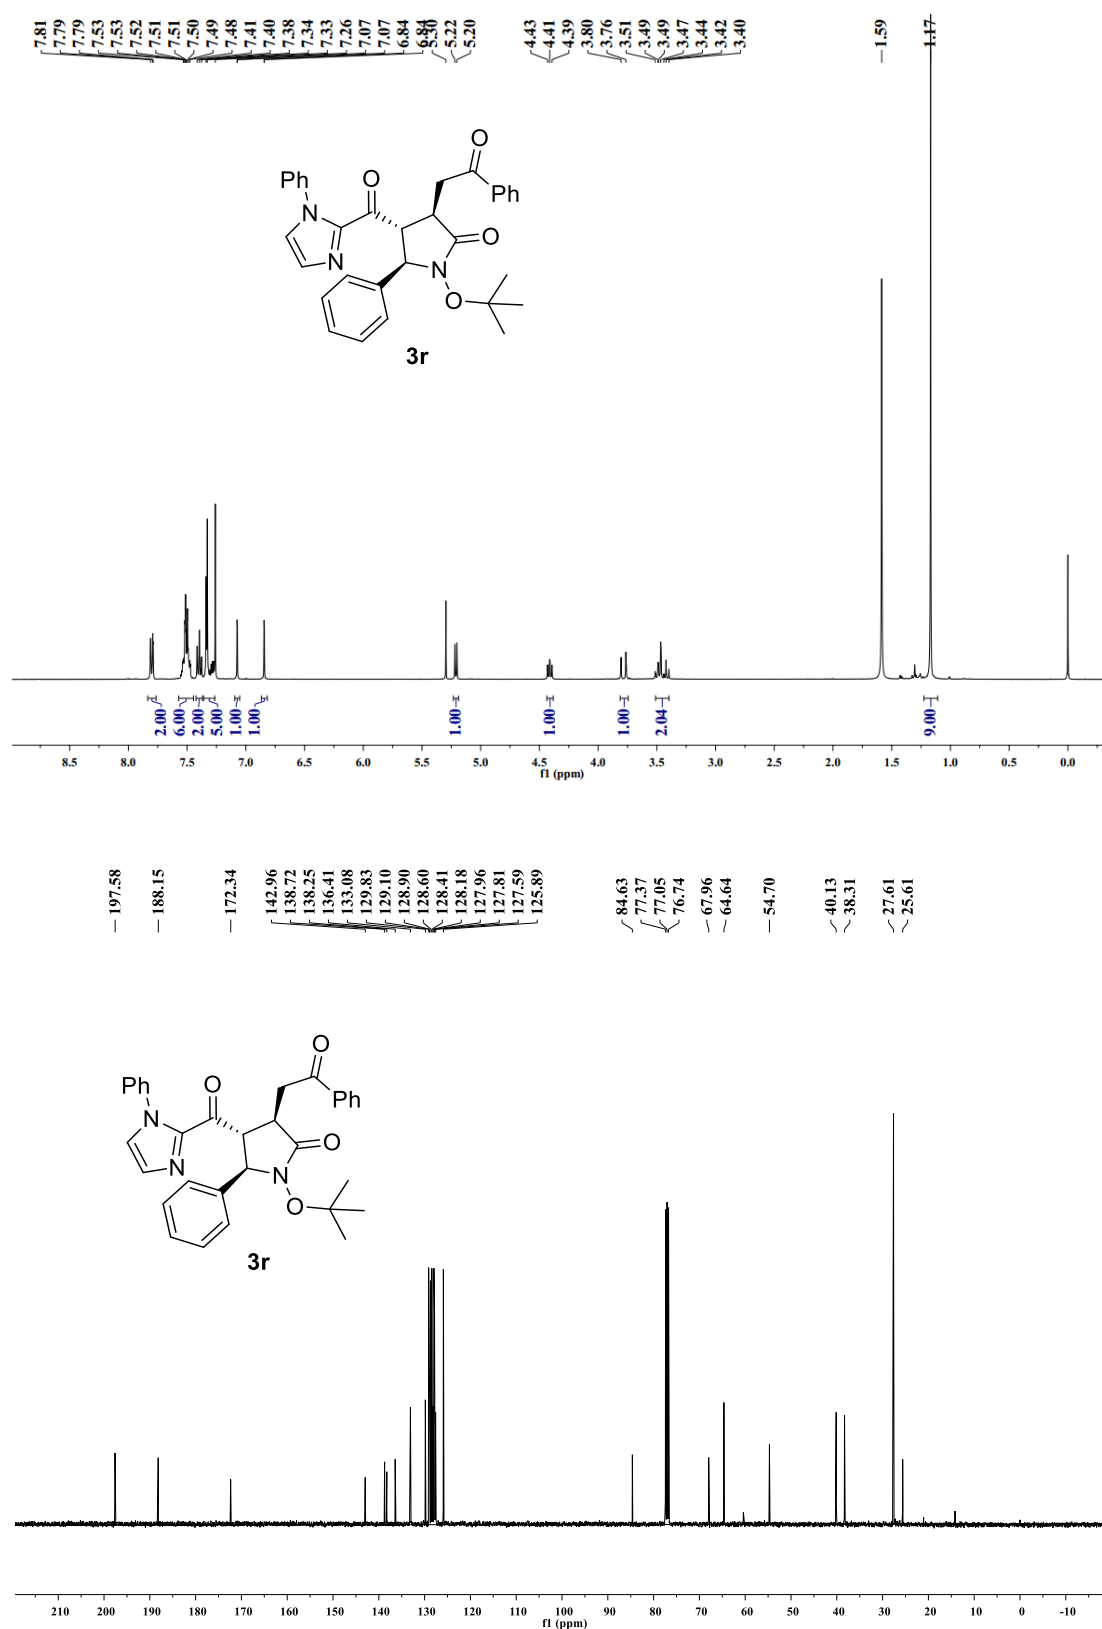

**Figure S18.**  $^1\text{H}$  and  $^{13}\text{C}$  NMR spectrum of **3r**.

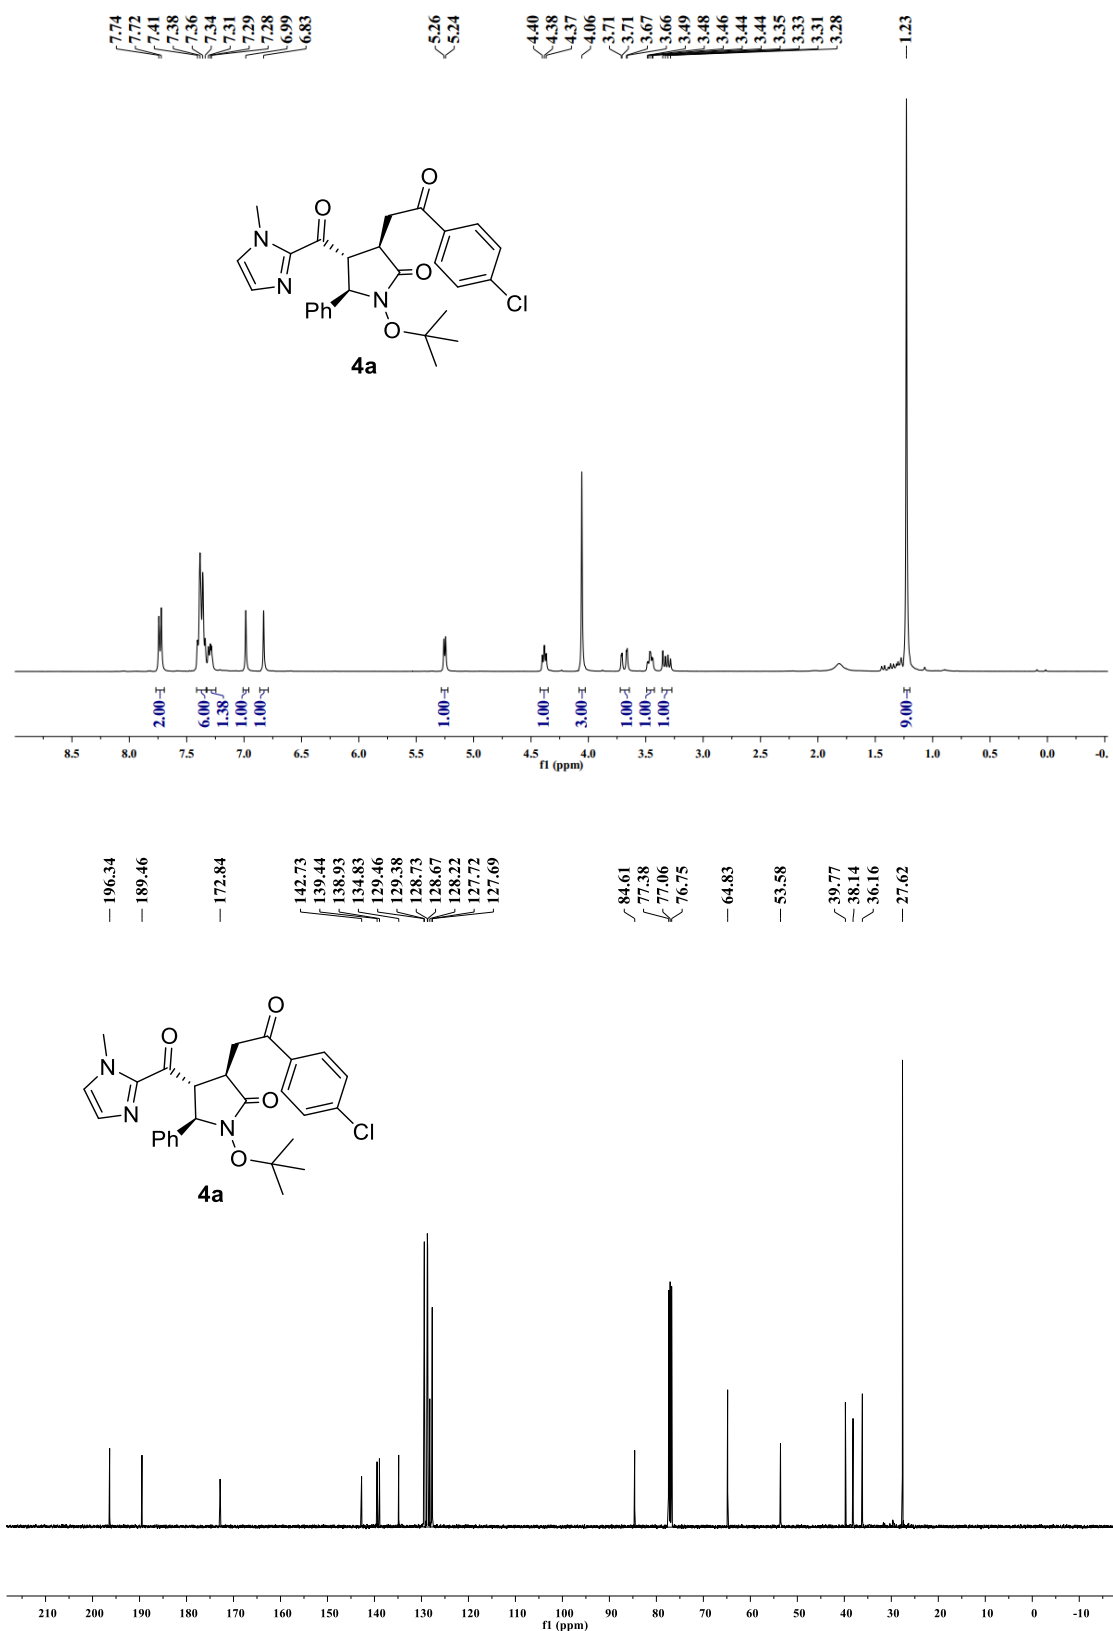

**Figure S19.** <sup>1</sup>H and <sup>13</sup>C NMR spectrum of **4a**.

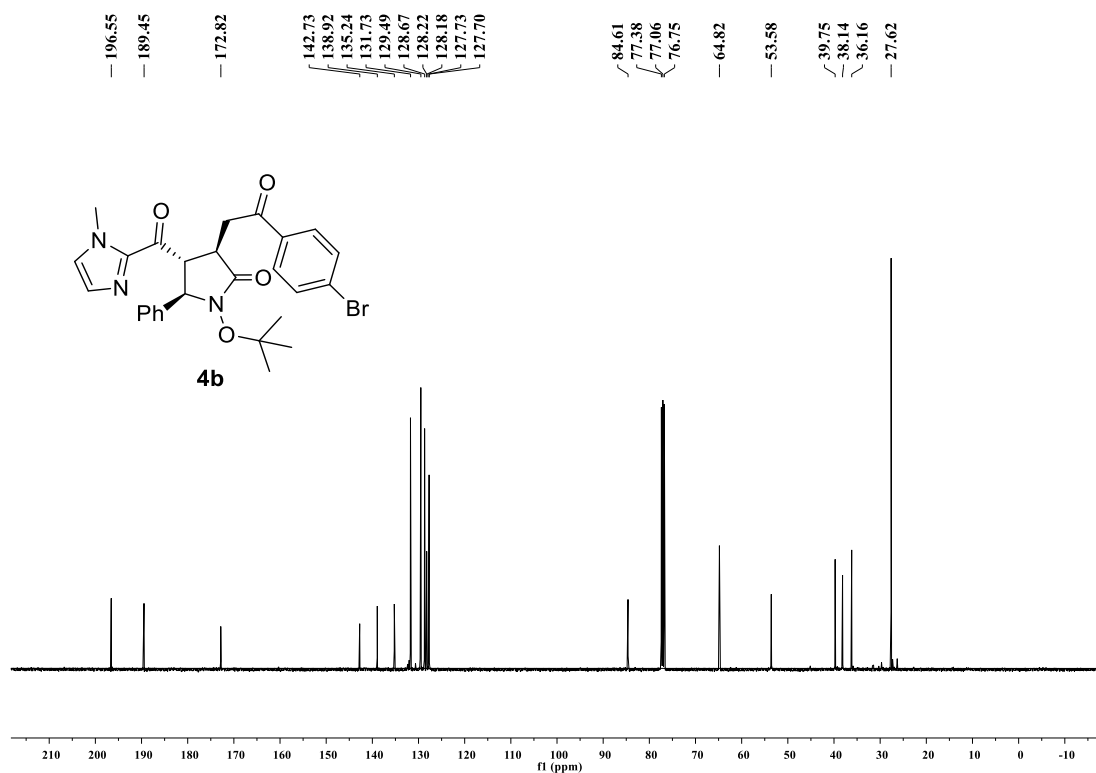



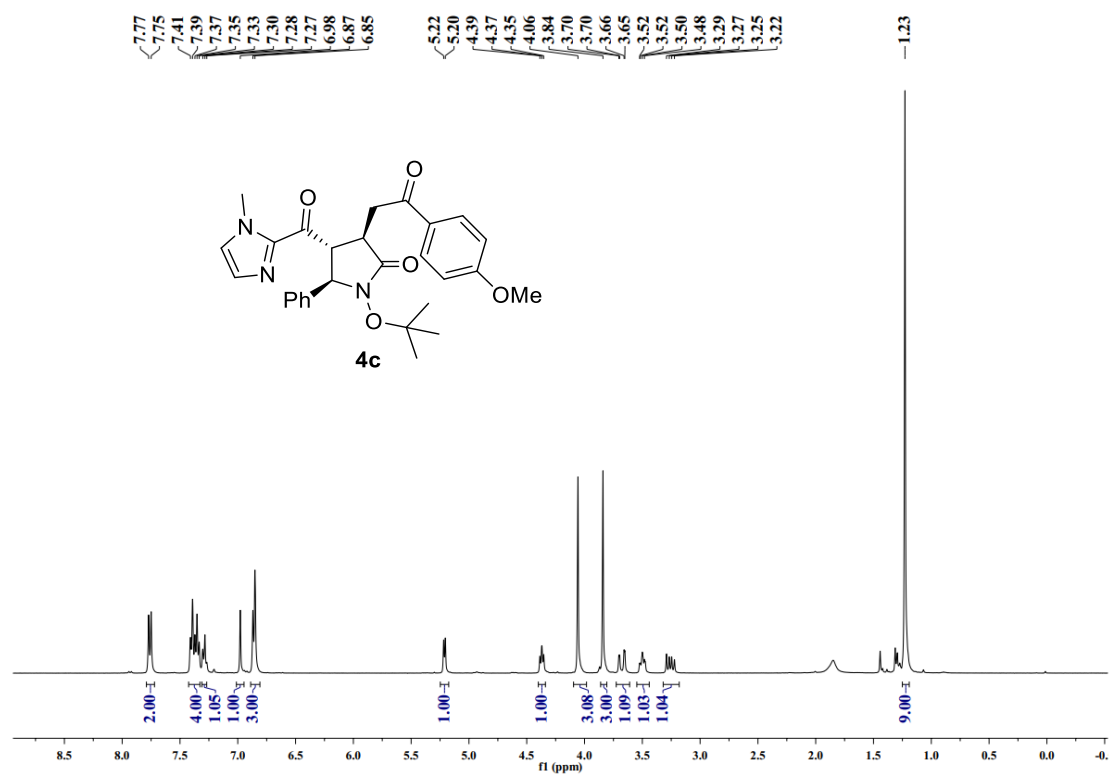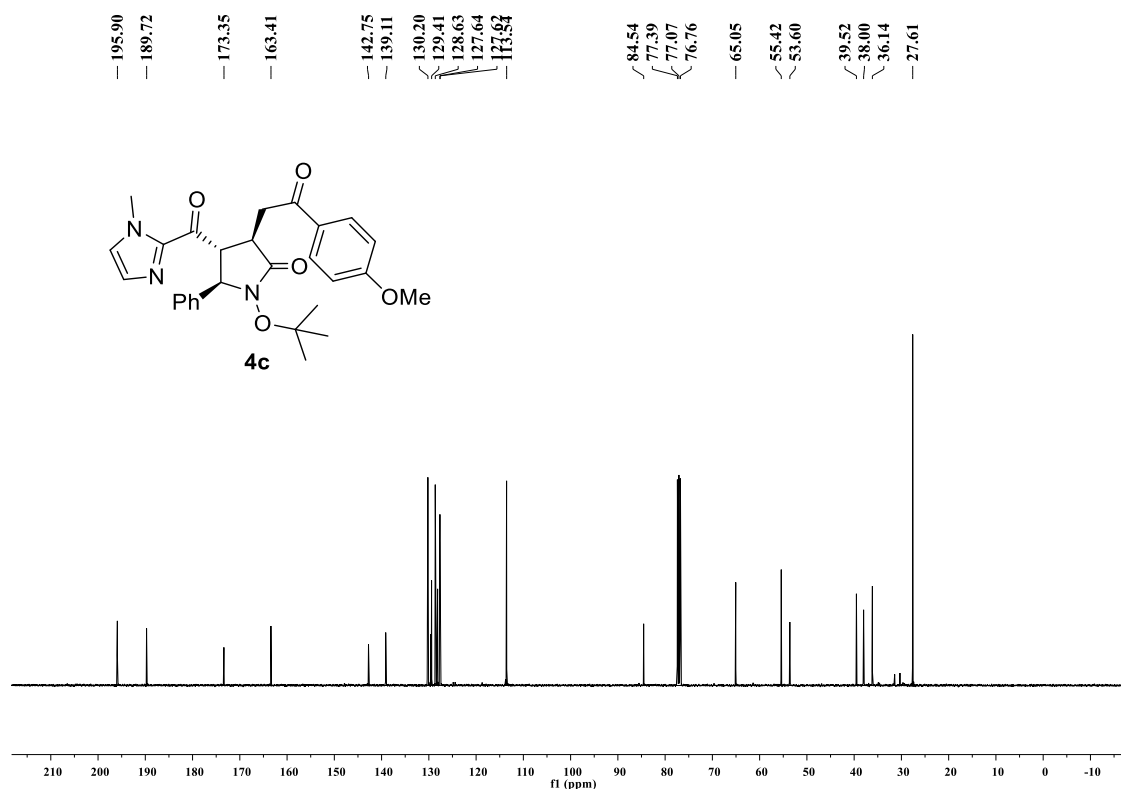

**Figure S21.** <sup>1</sup>H and <sup>13</sup>C NMR spectrum of **4c**.

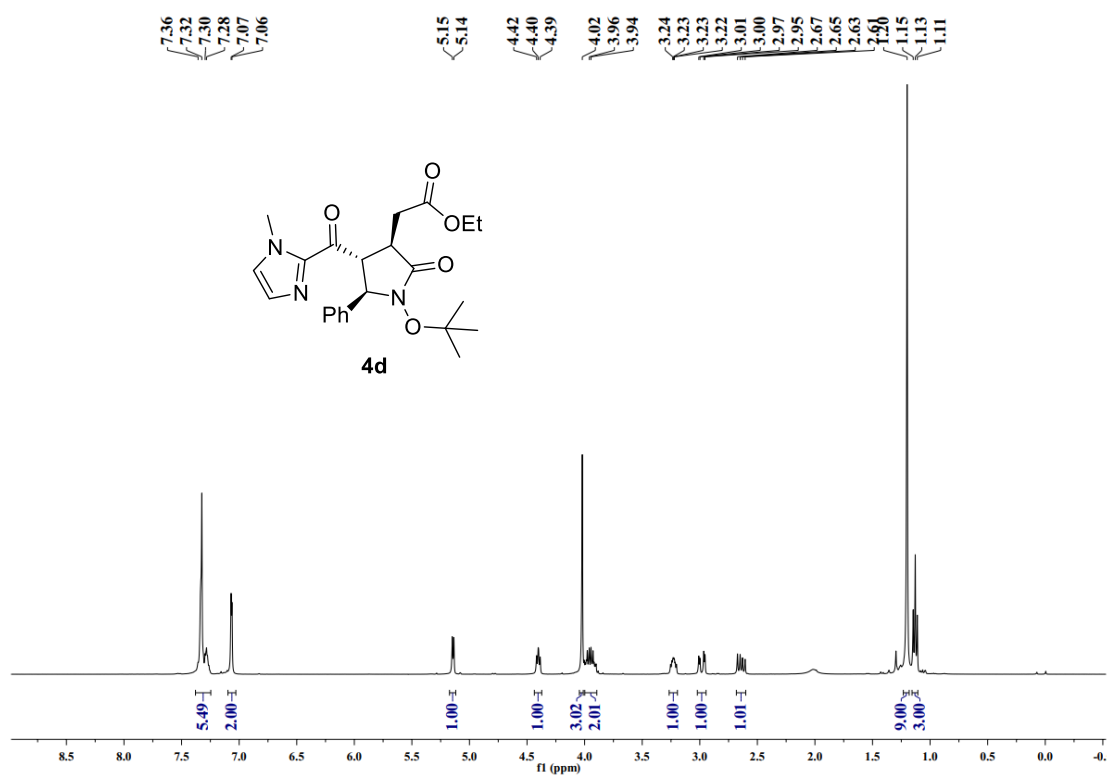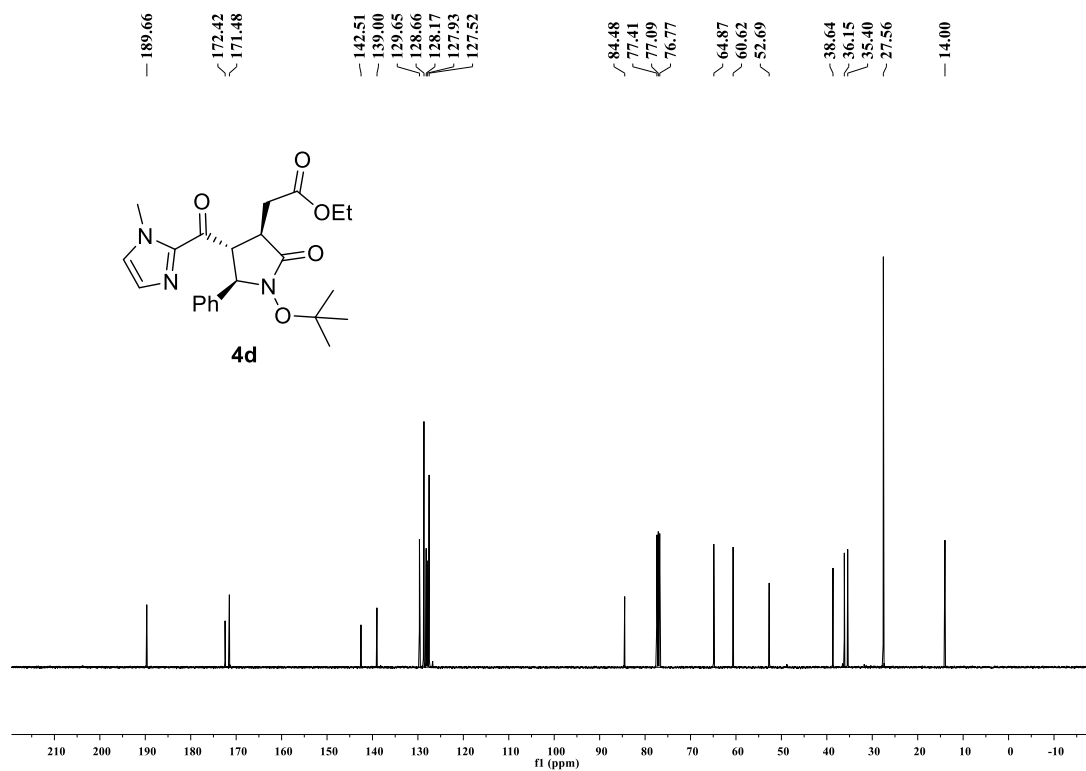

**Figure S22.**  $^1\text{H}$  and  $^{13}\text{C}$  NMR spectrum of **4d**.

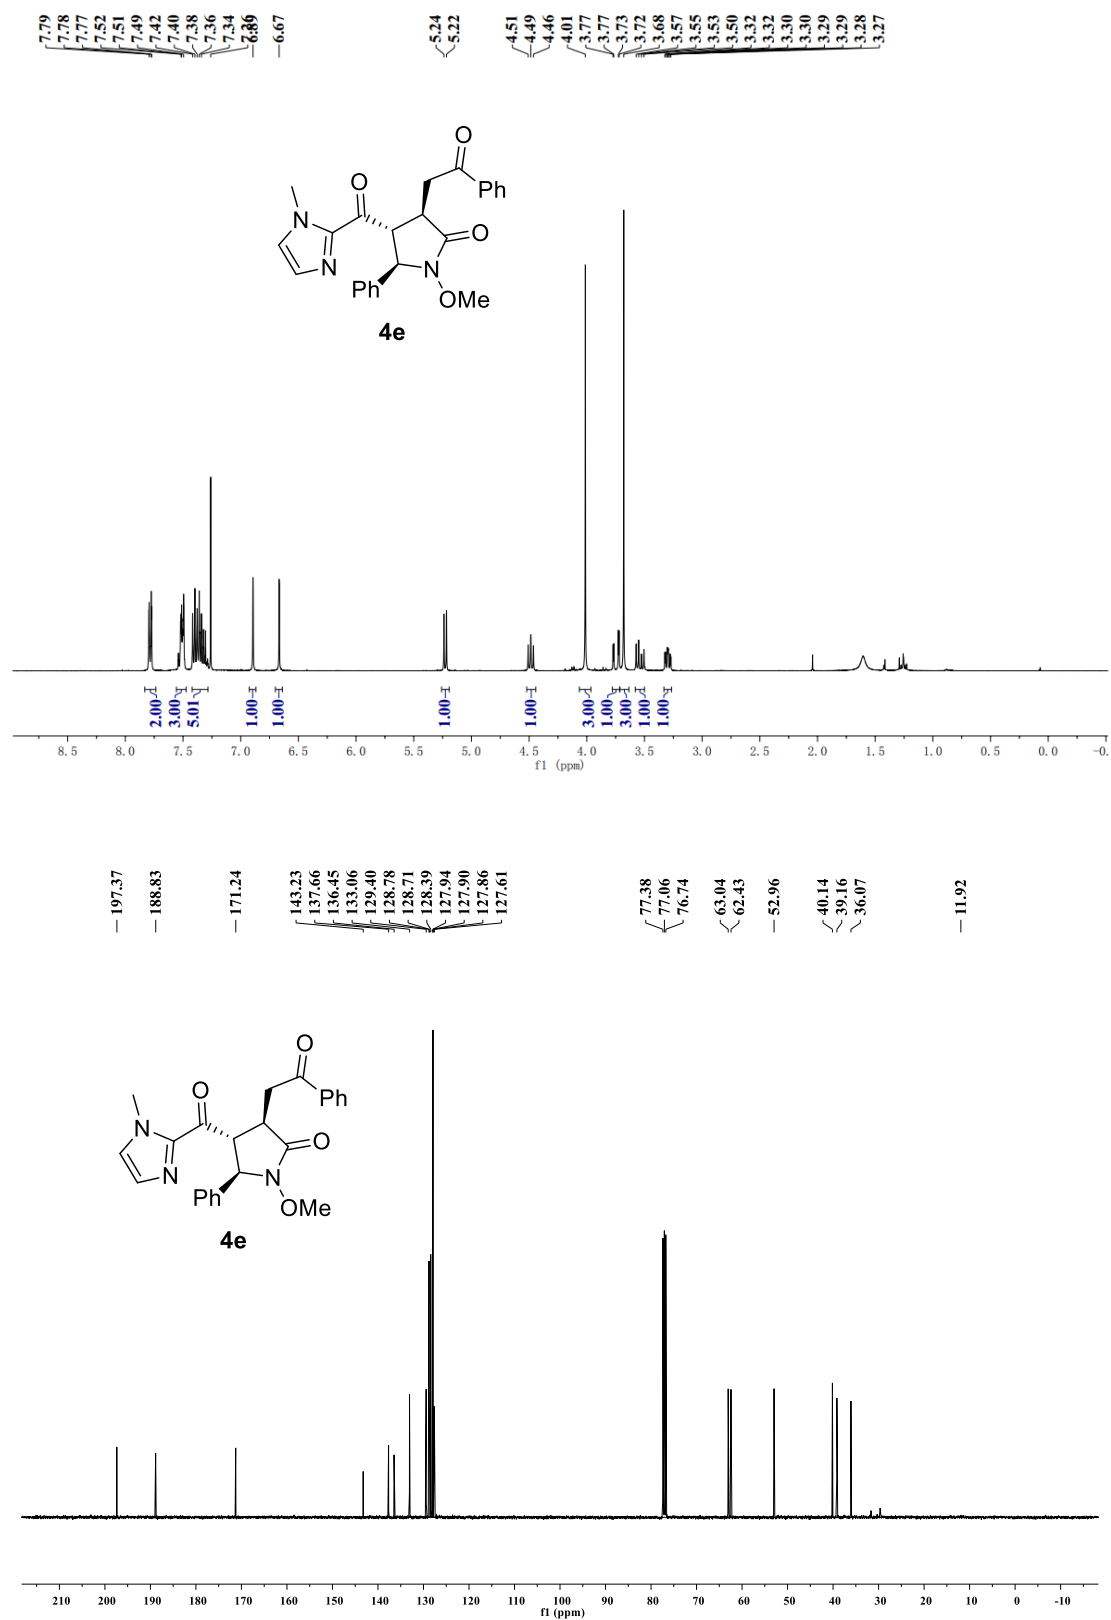

**Figure S23.**  $^1\text{H}$  and  $^{13}\text{C}$  NMR spectrum of **4e**.

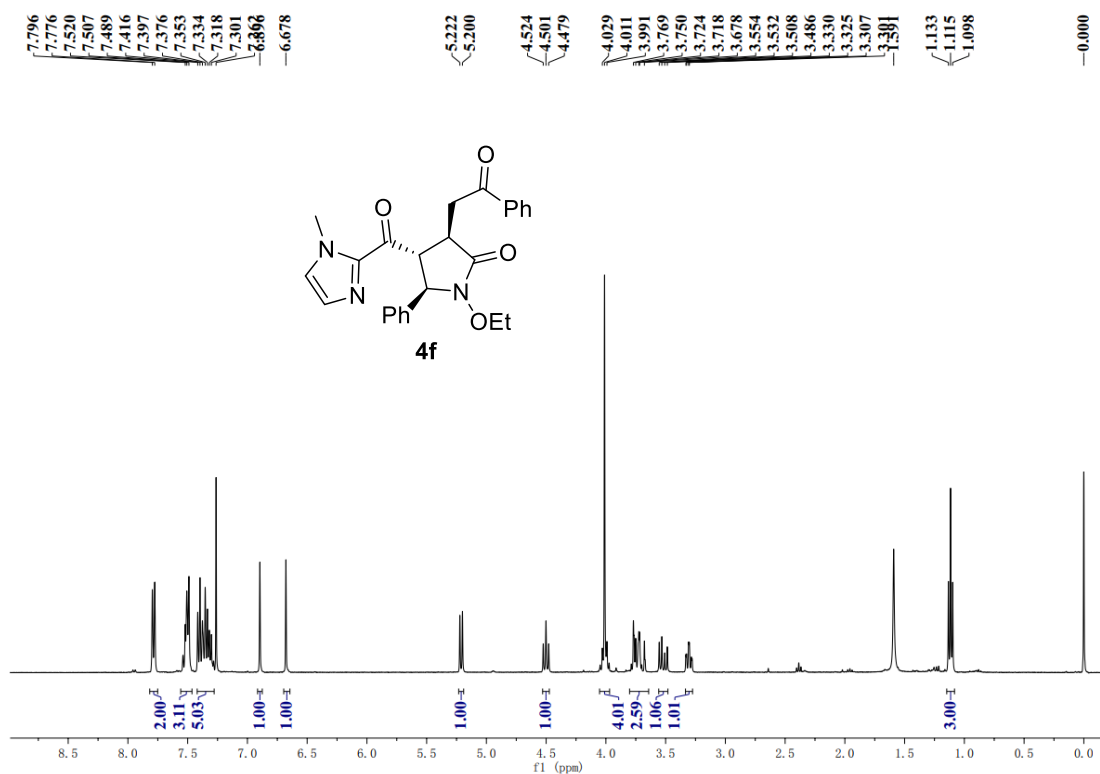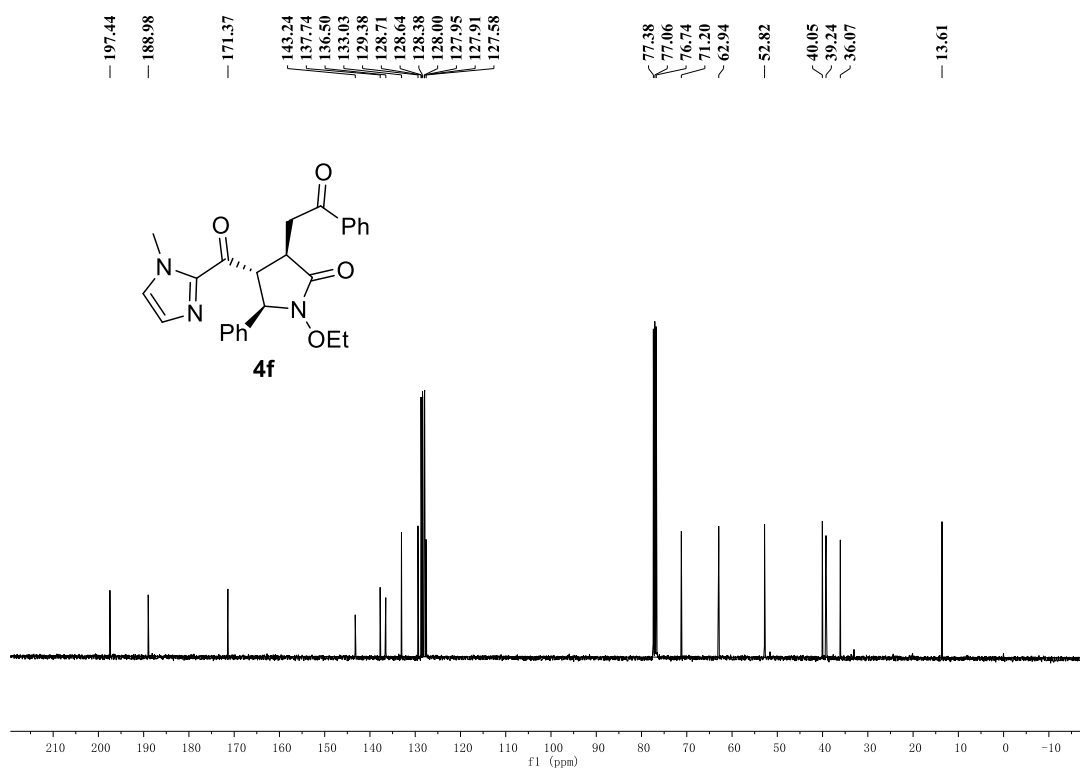

**Figure S24.** <sup>1</sup>H, <sup>13</sup>C NMR spectrum of 4f.

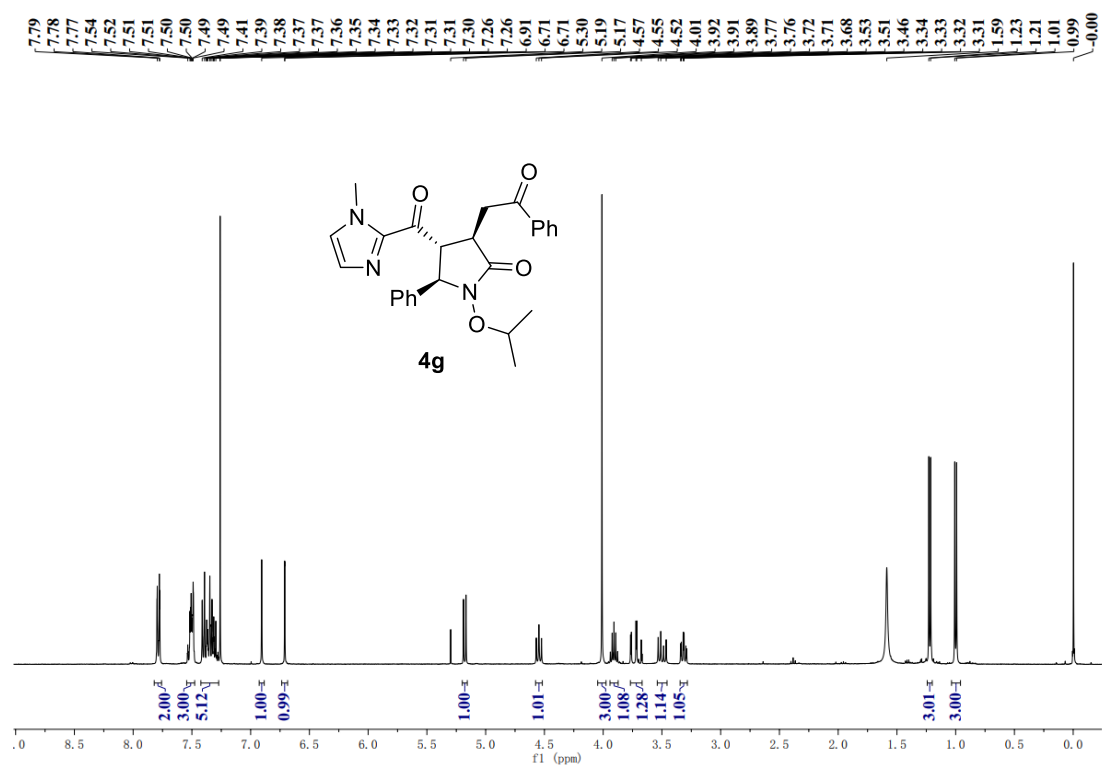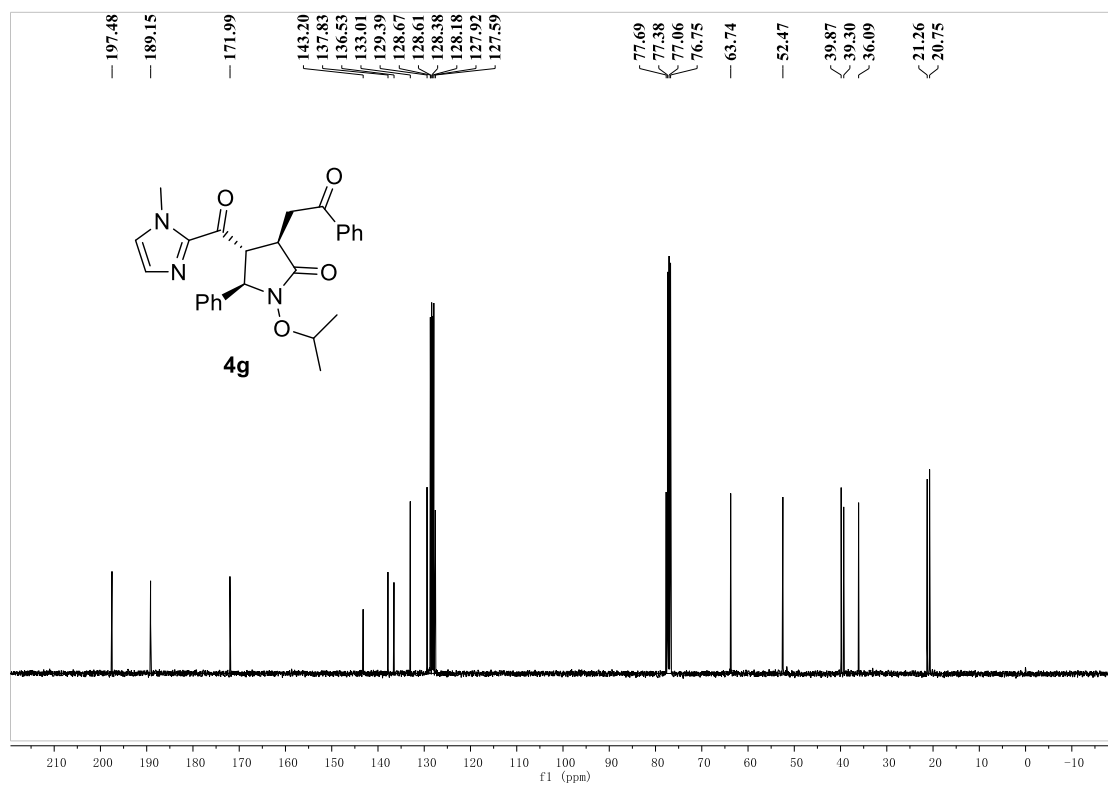

**Figure S25.** <sup>1</sup>H and <sup>13</sup>C NMR spectrum of **4g**.

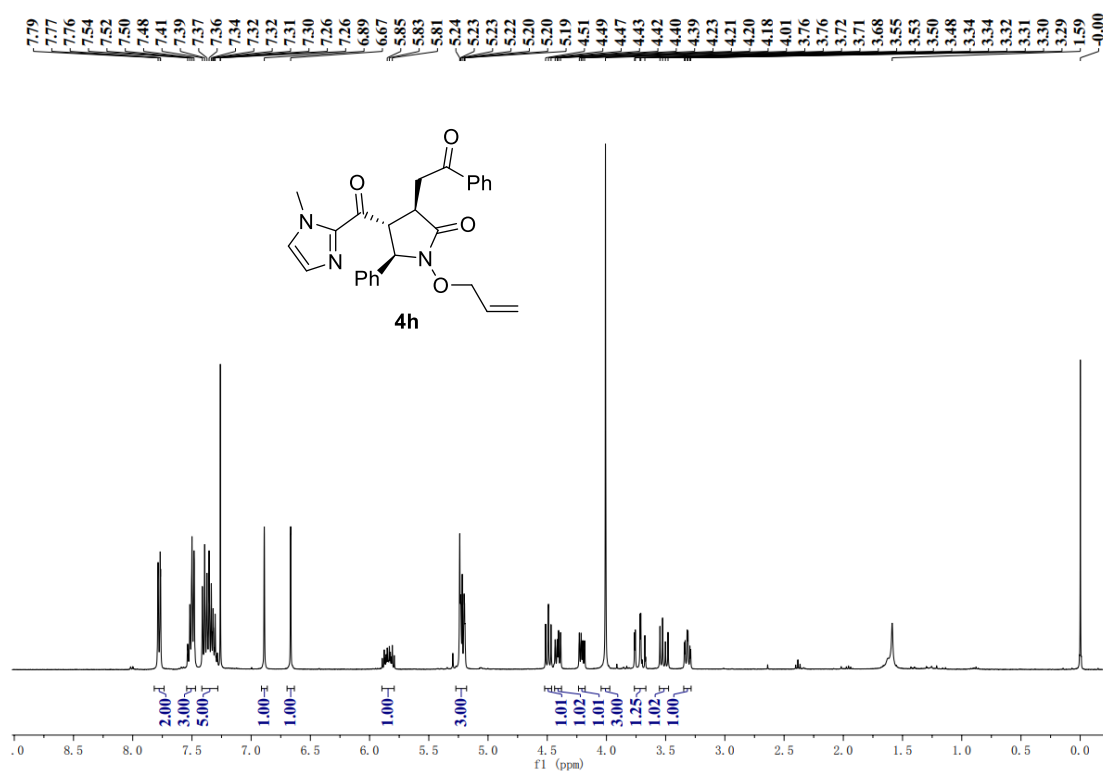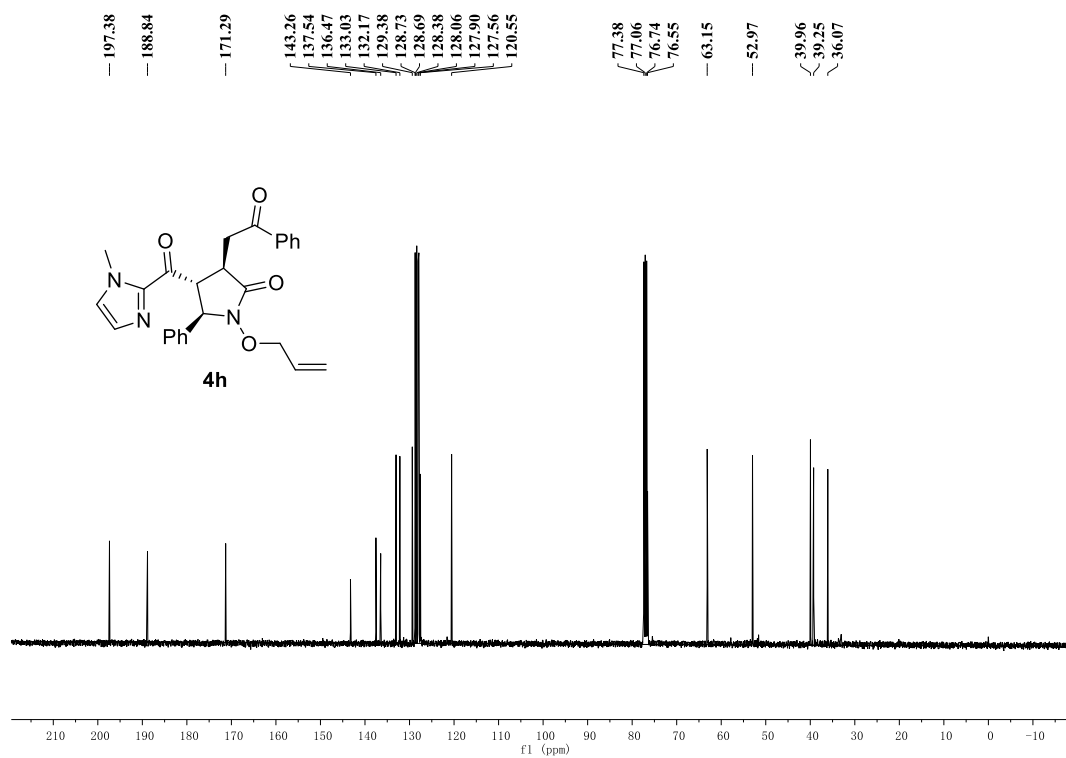

**Figure S26.** <sup>1</sup>H and <sup>13</sup>C NMR spectrum of **4h**.

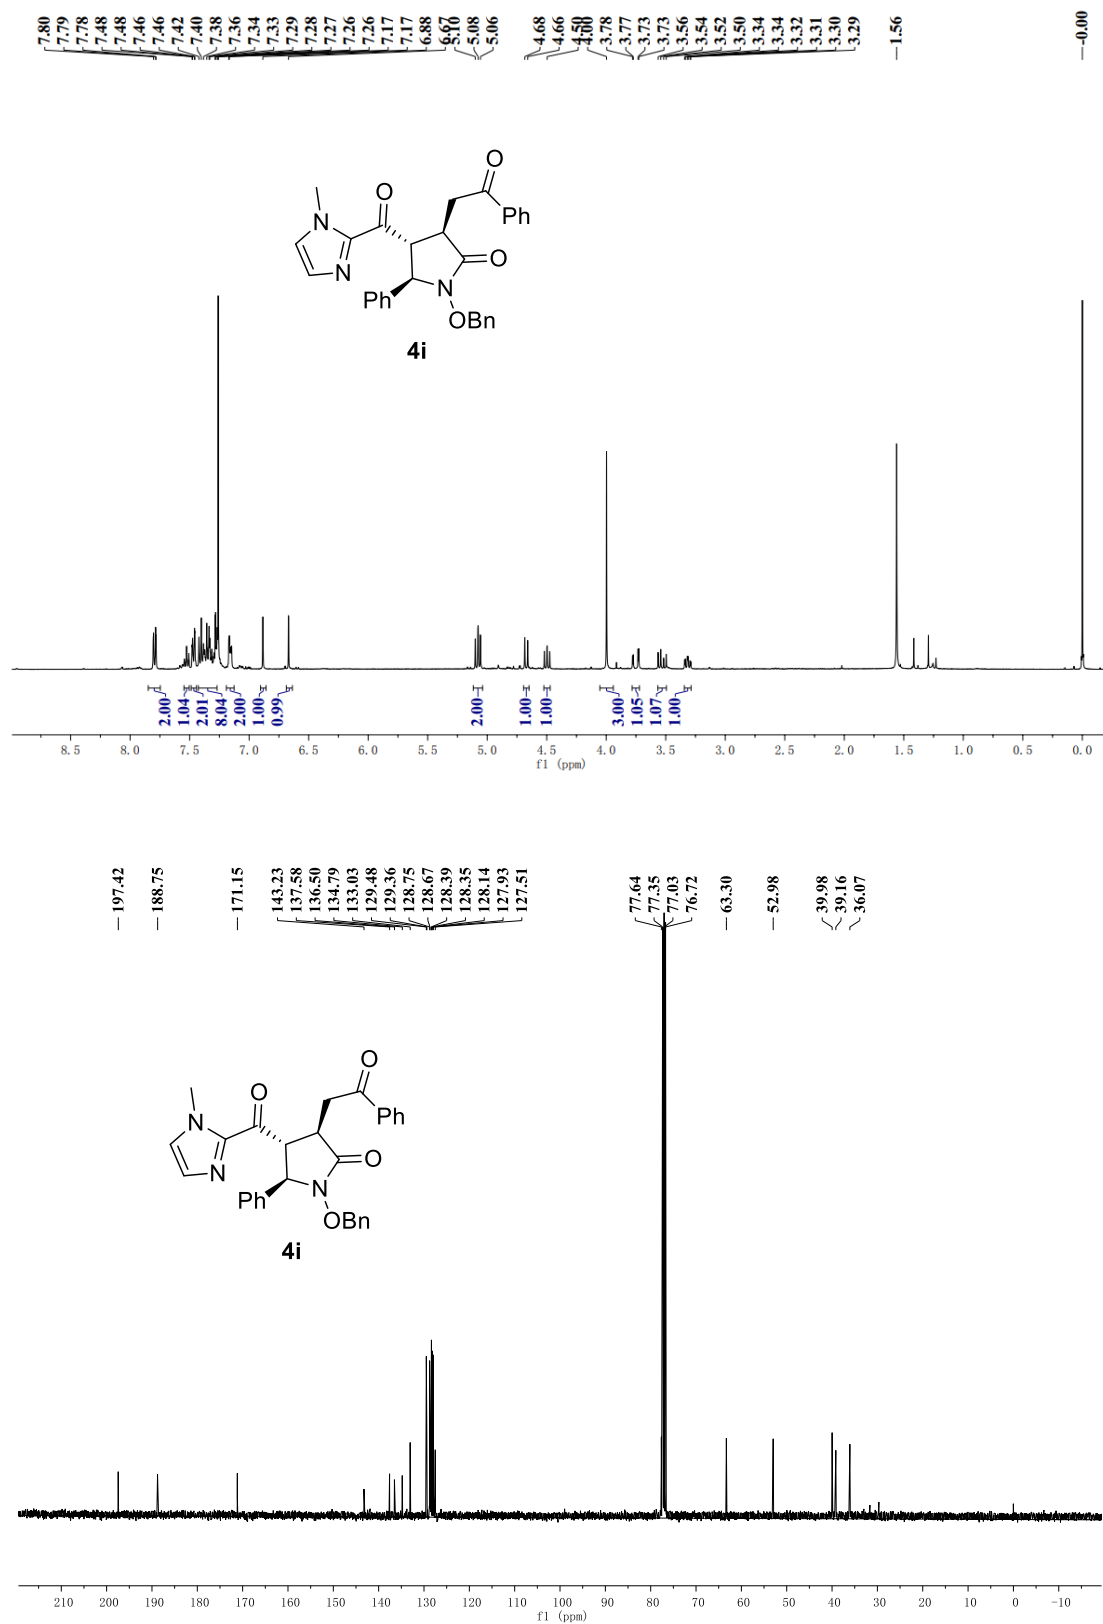

**Figure S27.** <sup>1</sup>H and <sup>13</sup>C NMR spectrum of **4i**.

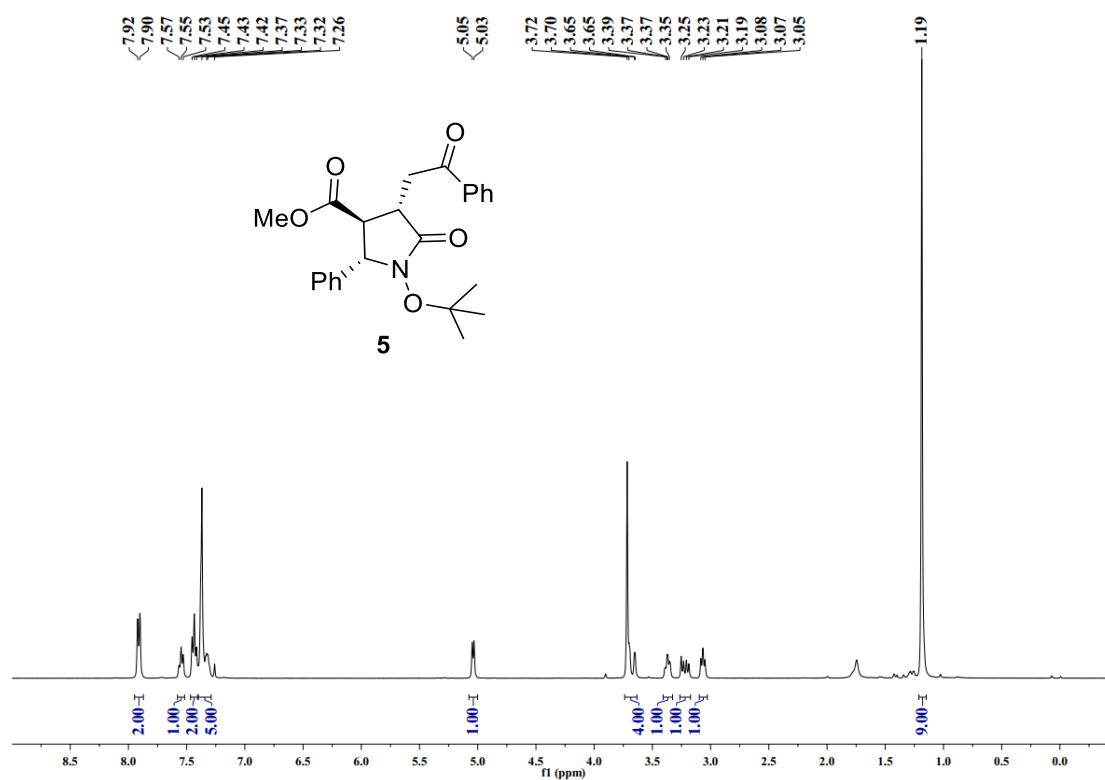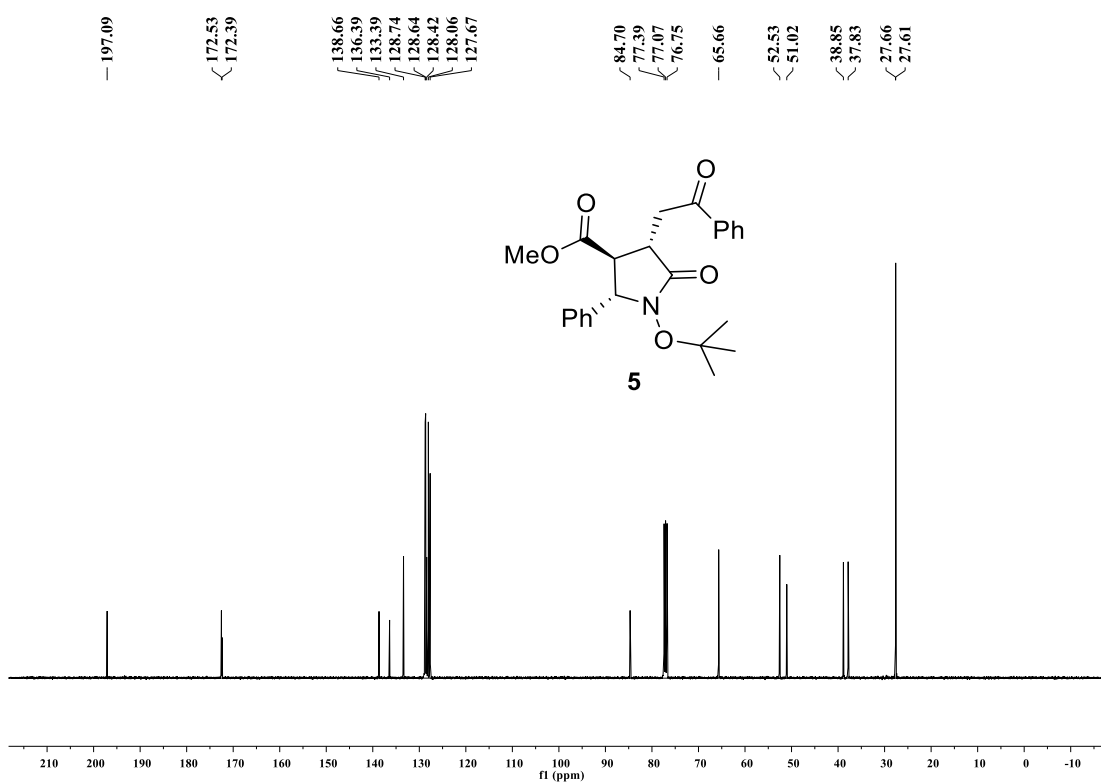

**Figure S28.** <sup>1</sup>H and <sup>13</sup>C NMR spectrum of **5**.



## 7. HPLC Traces on Chiral Stationary Phase

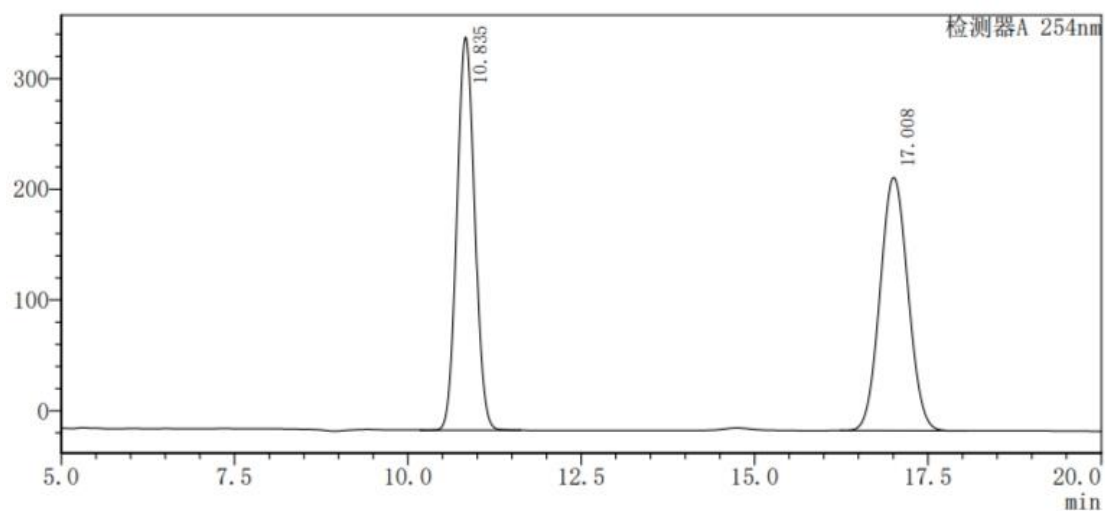

<峰表>

检测器A 254nm

| 峰号 | 保留时间   | 面积       | 高度     | 面积%     |
|----|--------|----------|--------|---------|
| 1  | 10.835 | 6318824  | 354965 | 49.853  |
| 2  | 17.008 | 6356151  | 228717 | 50.147  |
| 总计 |        | 12674974 | 583682 | 100.000 |

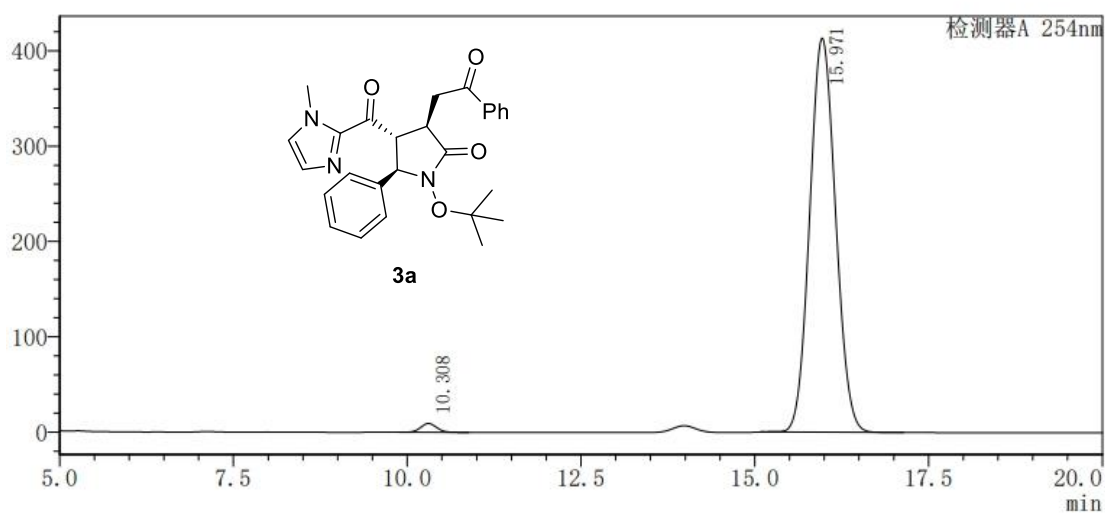

<峰表>

检测器A 254nm

| 峰号 | 保留时间   | 面积       | 高度     | 面积%     |
|----|--------|----------|--------|---------|
| 1  | 10.308 | 148274   | 9199   | 1.364   |
| 2  | 15.971 | 10724884 | 413375 | 98.636  |
| 总计 |        | 10873158 | 422574 | 100.000 |

**Figure S29.** HPLC traces of racemic (reference) and chiral **3a**, Area integration = 98.6: 1.4 (97% ee).

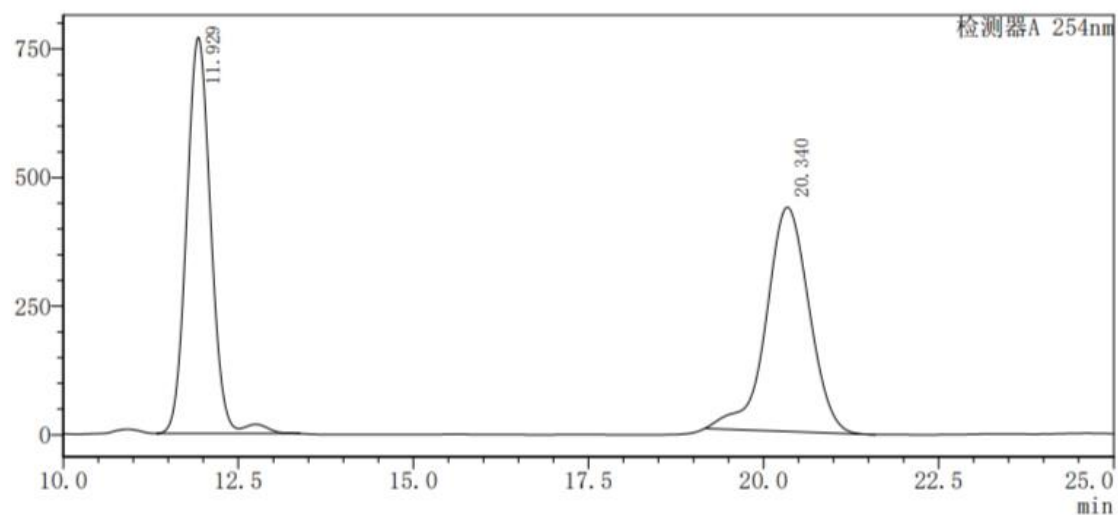

<峰表>

检测器A 254nm

| 峰号 | 保留时间   | 面积       | 高度      | 面积%     |
|----|--------|----------|---------|---------|
| 1  | 11.929 | 18613649 | 770053  | 49.921  |
| 2  | 20.340 | 18672770 | 435964  | 50.079  |
| 总计 |        | 37286419 | 1206017 | 100.000 |

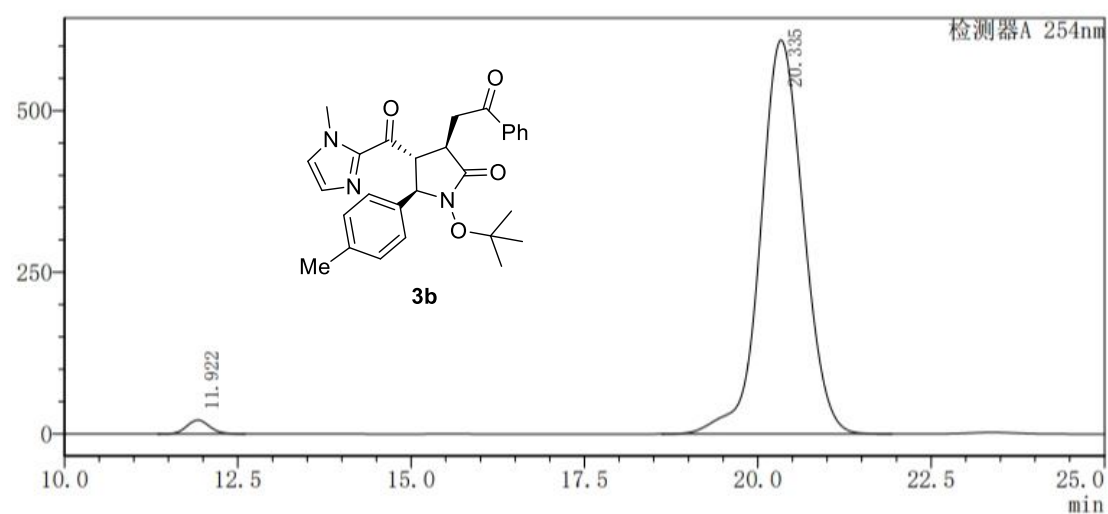

<峰表>

检测器A 254nm

| 峰号 | 保留时间   | 面积       | 高度     | 面积%     |
|----|--------|----------|--------|---------|
| 1  | 11.922 | 492446   | 21405  | 1.837   |
| 2  | 20.335 | 26315230 | 609206 | 98.163  |
| 总计 |        | 26807677 | 630611 | 100.000 |

**Figure S30.** HPLC traces of racemic (reference) and chiral **3b**. Area integration = 98.1:1.9 (96% ee).

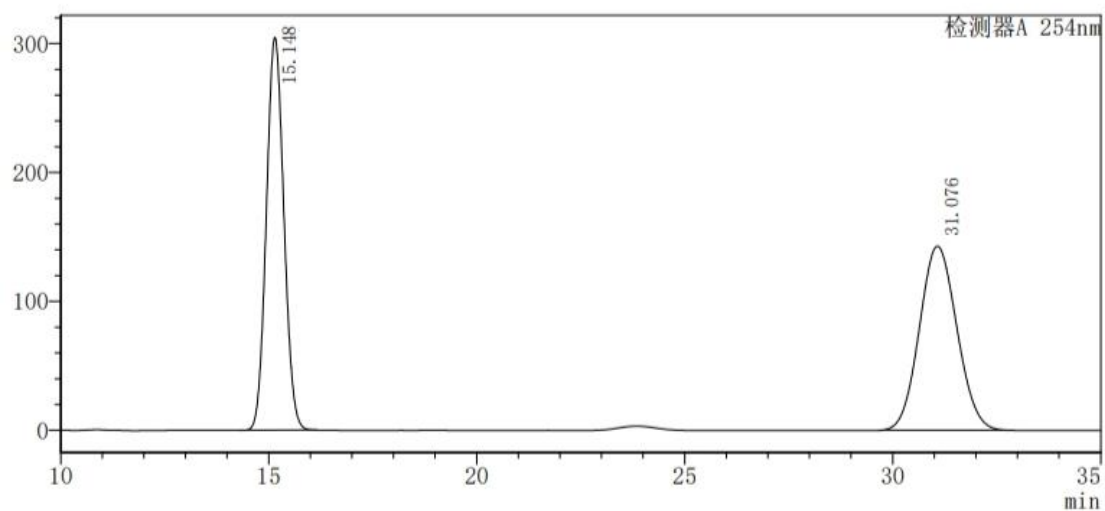

<峰表>

检测器A 254nm

| 峰号 | 保留时间   | 面积       | 高度     | 面积%     |
|----|--------|----------|--------|---------|
| 1  | 15.148 | 8912056  | 304769 | 49.879  |
| 2  | 31.076 | 8955236  | 142823 | 50.121  |
| 总计 |        | 17867292 | 447592 | 100.000 |

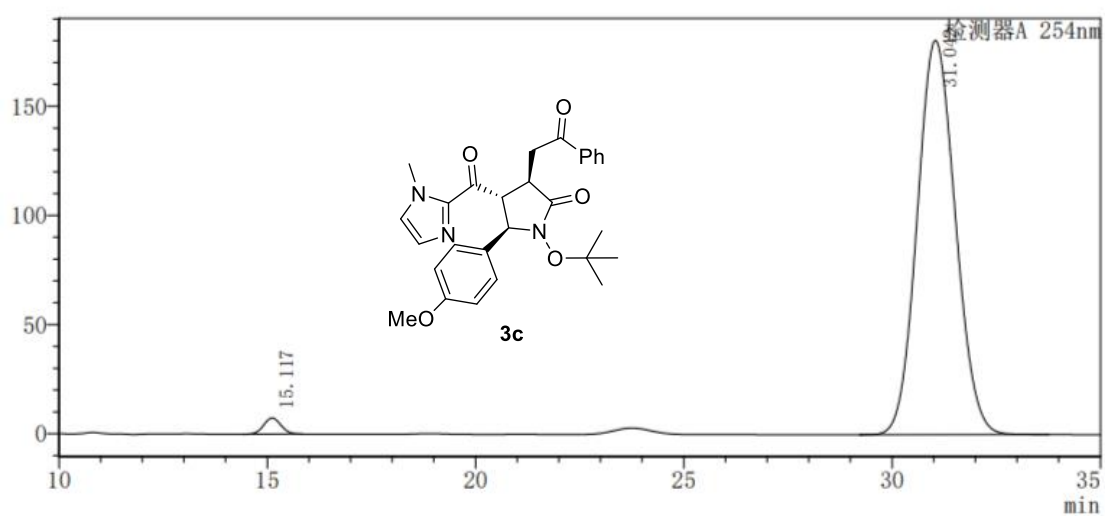

<峰表>

检测器A 254nm

| 峰号 | 保留时间   | 面积       | 高度     | 面积%     |
|----|--------|----------|--------|---------|
| 1  | 15.117 | 211508   | 7367   | 1.807   |
| 2  | 31.042 | 11496183 | 180542 | 98.193  |
| 总计 |        | 11707691 | 187909 | 100.000 |

**Figure S31.** HPLC traces of racemic (reference) and chiral **3c**. Area integration = 98.2:1.8 (96% ee).

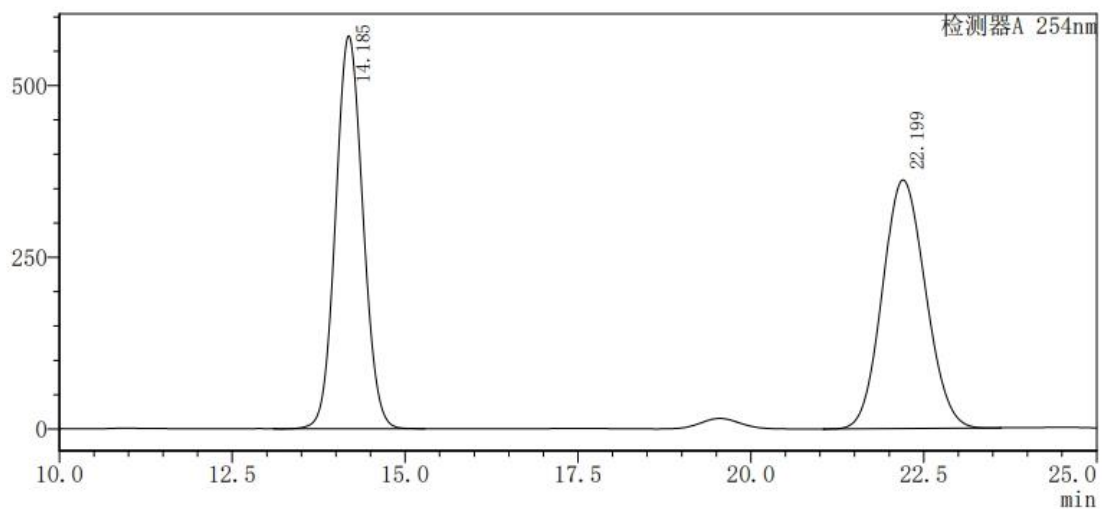

<峰表>

检测器A 254nm

| 峰号 | 保留时间   | 面积       | 高度     | 面积%     |
|----|--------|----------|--------|---------|
| 1  | 14.185 | 15751226 | 572119 | 50.136  |
| 2  | 22.199 | 15665507 | 361818 | 49.864  |
| 总计 |        | 31416733 | 933937 | 100.000 |

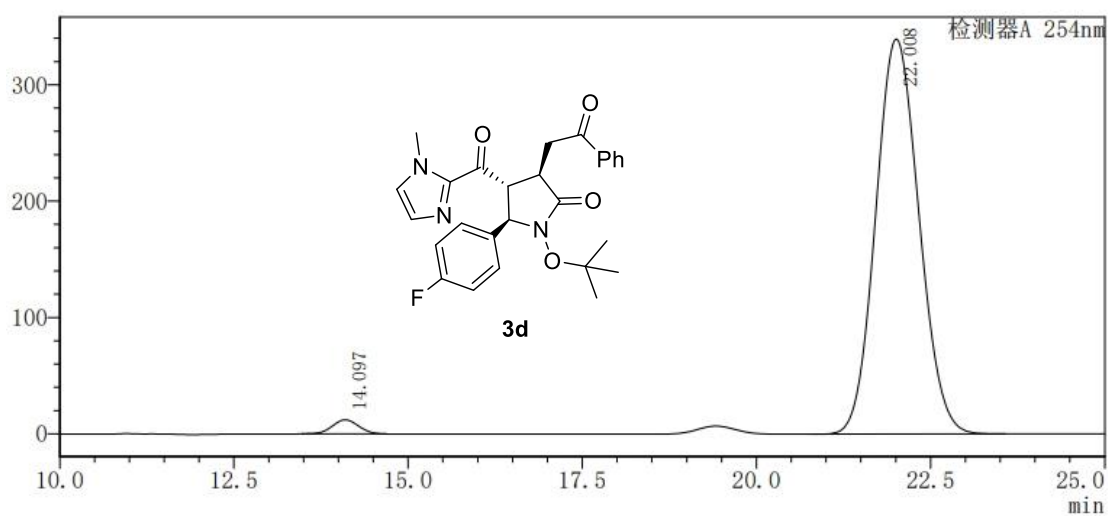

<峰表>

检测器A 254nm

| 峰号 | 保留时间   | 面积       | 高度     | 面积%     |
|----|--------|----------|--------|---------|
| 1  | 14.097 | 319596   | 12107  | 2.138   |
| 2  | 22.008 | 14631125 | 339504 | 97.862  |
| 总计 |        | 14950721 | 351611 | 100.000 |

**Figure S32.** HPLC traces of racemic (reference) and chiral **3d**. Area integration = 97.9:2.1 (96% ee).

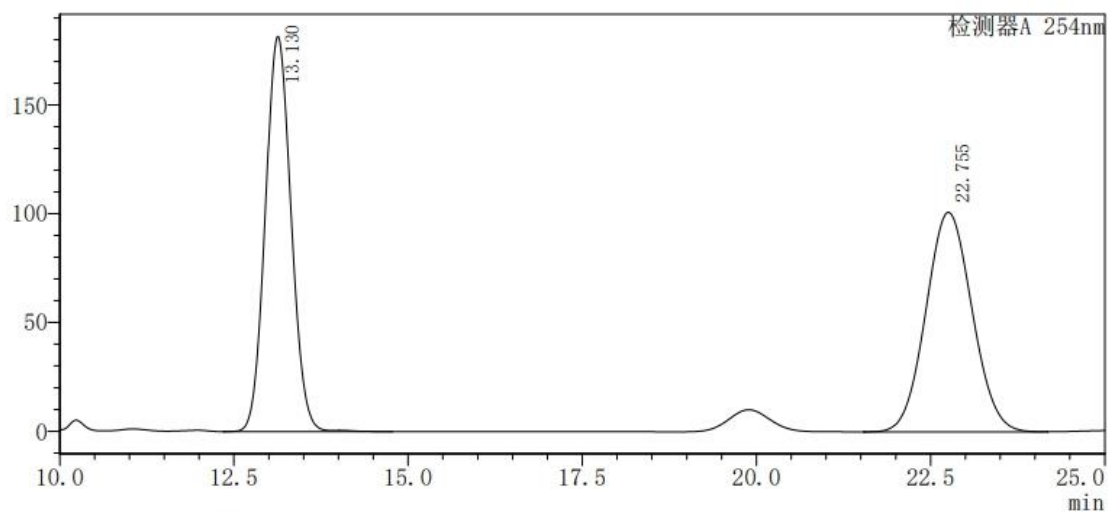

<峰表>

检测器A 254nm

| 峰号 | 保留时间   | 面积      | 高度     | 面积%     |
|----|--------|---------|--------|---------|
| 1  | 13.130 | 4663797 | 181690 | 50.007  |
| 2  | 22.755 | 4662553 | 100927 | 49.993  |
| 总计 |        | 9326350 | 282617 | 100.000 |

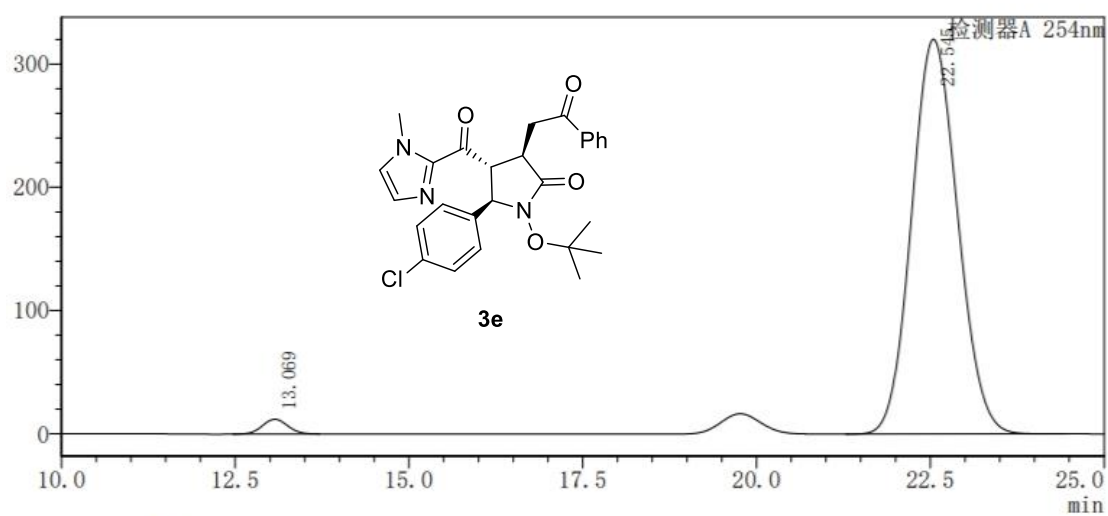

<峰表>

检测器A 254nm

| 峰号 | 保留时间   | 面积       | 高度     | 面积%     |
|----|--------|----------|--------|---------|
| 1  | 13.069 | 301334   | 11975  | 1.998   |
| 2  | 22.545 | 14779547 | 320220 | 98.002  |
| 总计 |        | 15080880 | 332195 | 100.000 |

**Figure S33.** HPLC traces of racemic (reference) and chiral **3e**. Area integration = 98.0:2.0 (96% ee).

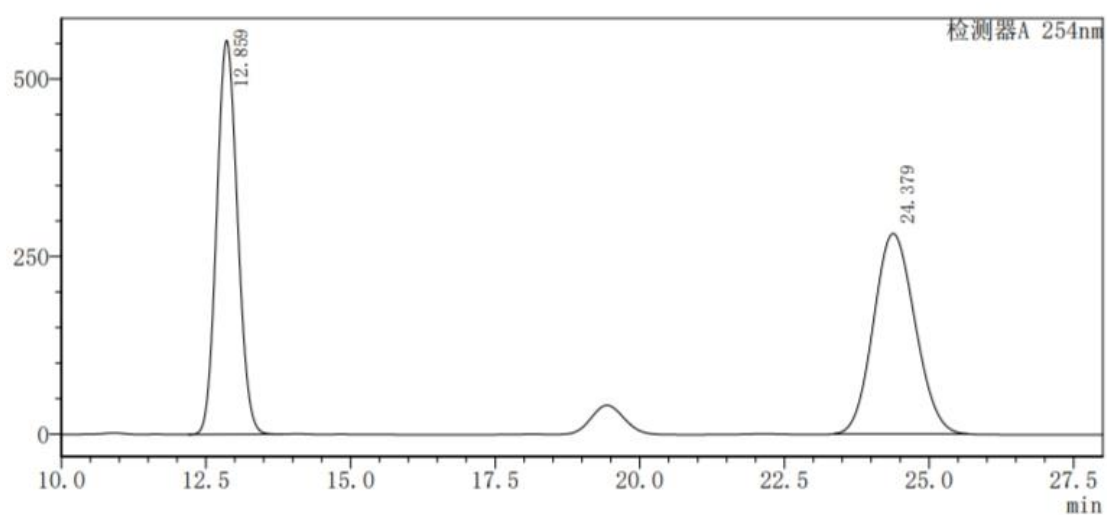

<峰表>

检测器A 254nm

| 峰号 | 保留时间   | 面积       | 高度     | 面积%     |
|----|--------|----------|--------|---------|
| 1  | 12.859 | 13929652 | 554398 | 49.738  |
| 2  | 24.379 | 14076270 | 281717 | 50.262  |
| 总计 |        | 28005921 | 836115 | 100.000 |

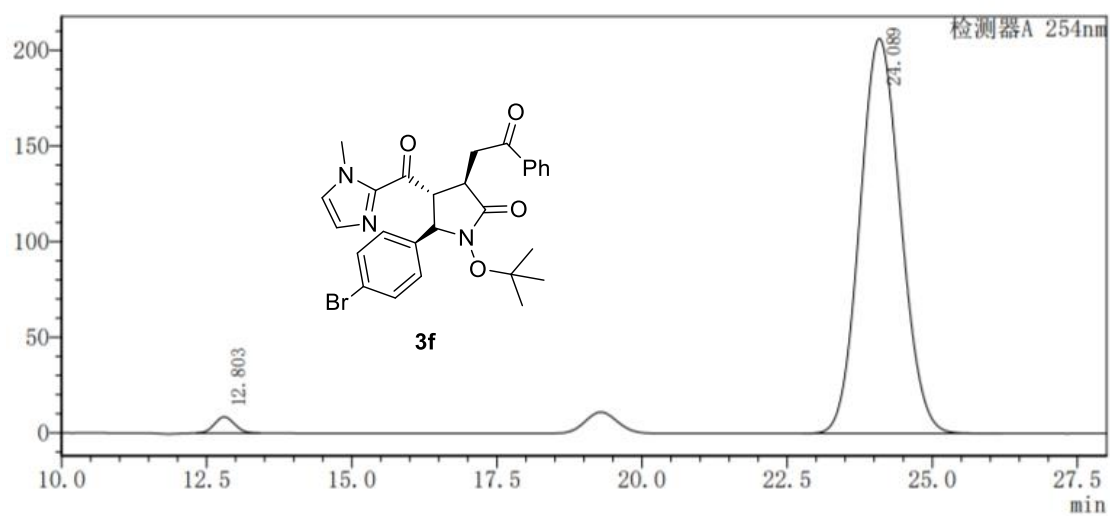

<峰表>

检测器A 254nm

| 峰号 | 保留时间   | 面积       | 高度     | 面积%     |
|----|--------|----------|--------|---------|
| 1  | 12.803 | 205187   | 8452   | 1.989   |
| 2  | 24.089 | 10108930 | 206484 | 98.011  |
| 总计 |        | 10314118 | 214935 | 100.000 |

**Figure S34.** HPLC traces of racemic (reference) and chiral **3f**. Area integration = 98.0:2.0 (96% ee).

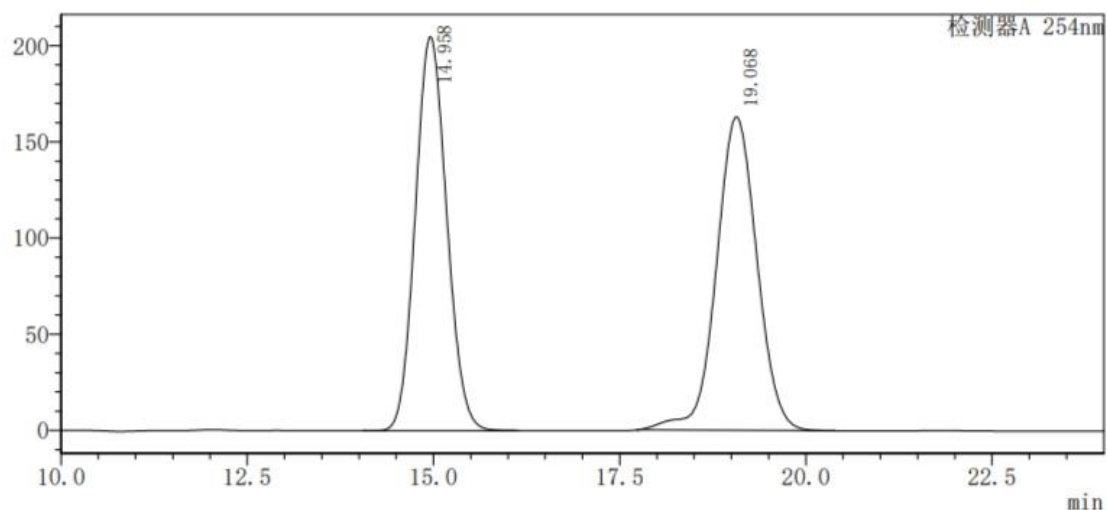

<峰表>

检测器A 254nm

| 峰号 | 保留时间   | 面积       | 高度     | 面积%     |
|----|--------|----------|--------|---------|
| 1  | 14.958 | 6009167  | 204796 | 49.238  |
| 2  | 19.068 | 6195179  | 162943 | 50.762  |
| 总计 |        | 12204346 | 367738 | 100.000 |

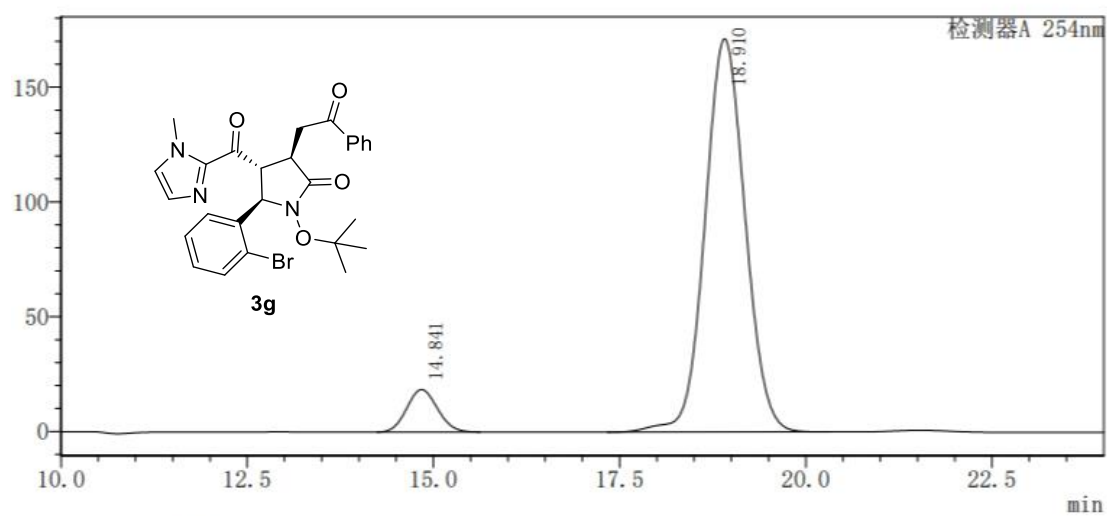

<峰表>

检测器A 254nm

| 峰号 | 保留时间   | 面积      | 高度     | 面积%     |
|----|--------|---------|--------|---------|
| 1  | 14.841 | 531796  | 18502  | 7.640   |
| 2  | 18.910 | 6429115 | 171286 | 92.360  |
| 总计 |        | 6960911 | 189787 | 100.000 |

**Figure S35.** HPLC traces of racemic (reference) and chiral **3g**. Area integration = 92.4:7.6 (85% ee).

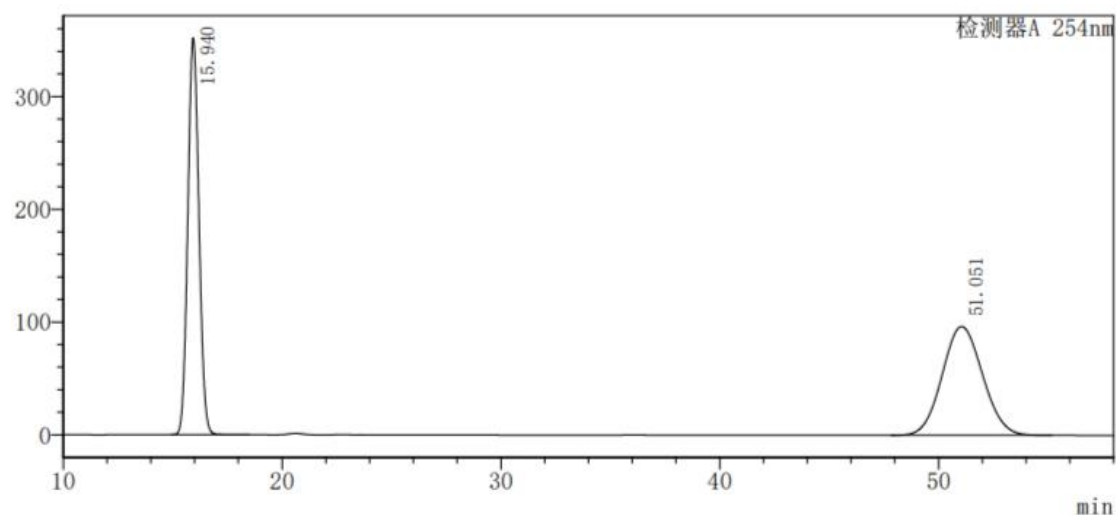

<峰表>

检测器A 254nm

| 峰号 | 保留时间   | 面积       | 高度     | 面积%     |
|----|--------|----------|--------|---------|
| 1  | 15.940 | 12378718 | 351925 | 49.978  |
| 2  | 51.051 | 12389705 | 96473  | 50.022  |
| 总计 |        | 24768424 | 448399 | 100.000 |

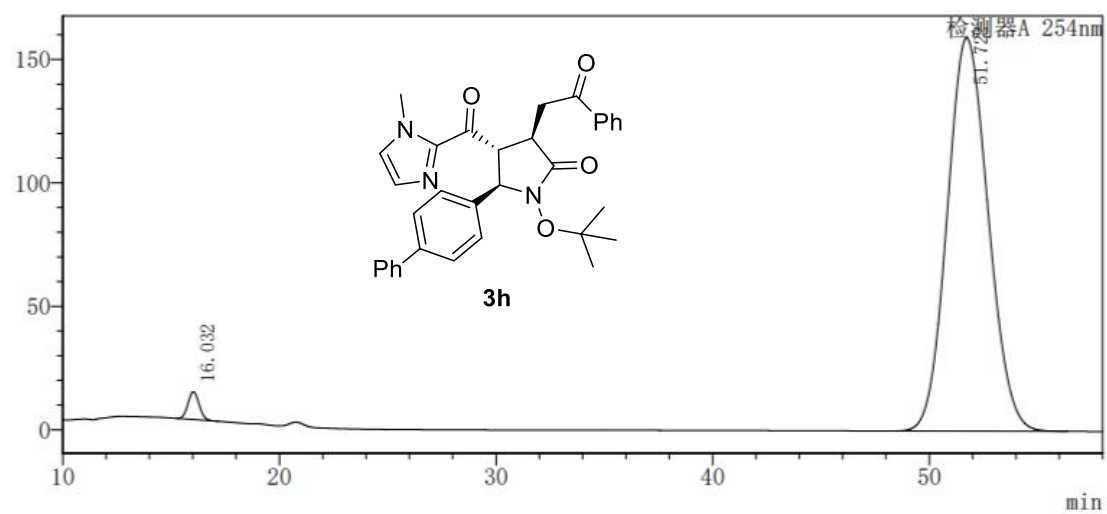

<峰表>

检测器A 254nm

| 峰号 | 保留时间   | 面积       | 高度     | 面积%     |
|----|--------|----------|--------|---------|
| 1  | 16.032 | 401089   | 11262  | 1.879   |
| 2  | 51.722 | 20941338 | 159280 | 98.121  |
| 总计 |        | 21342426 | 170542 | 100.000 |

**Figure S36.** HPLC traces of racemic (reference) and chiral **3h**. Area integration = 98.1:1.9 (96% ee).



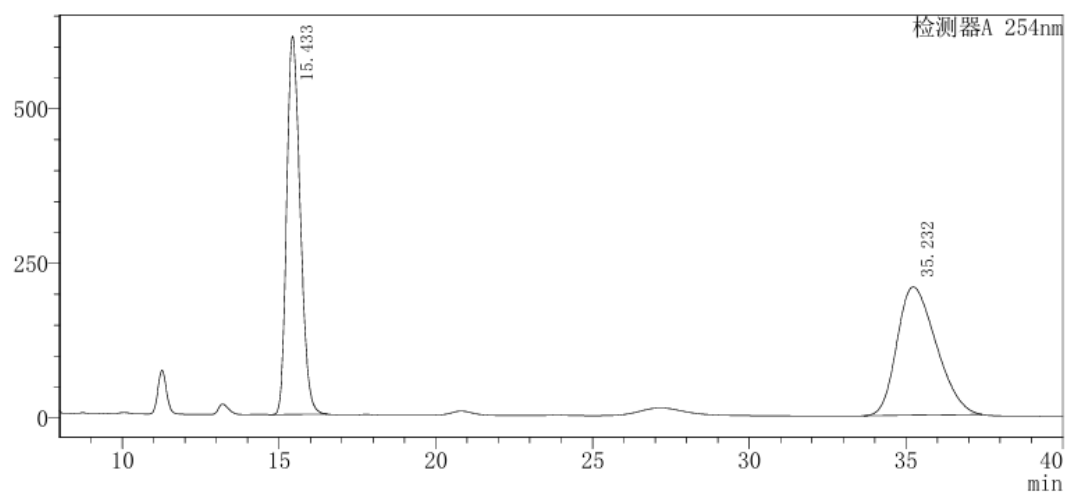

<峰表>

检测器A 254nm

| 峰号 | 保留时间   | 面积       | 高度     | 面积%     |
|----|--------|----------|--------|---------|
| 1  | 15.433 | 18340084 | 611749 | 50.396  |
| 2  | 35.232 | 18051733 | 207535 | 49.604  |
| 总计 |        | 36391817 | 819284 | 100.000 |

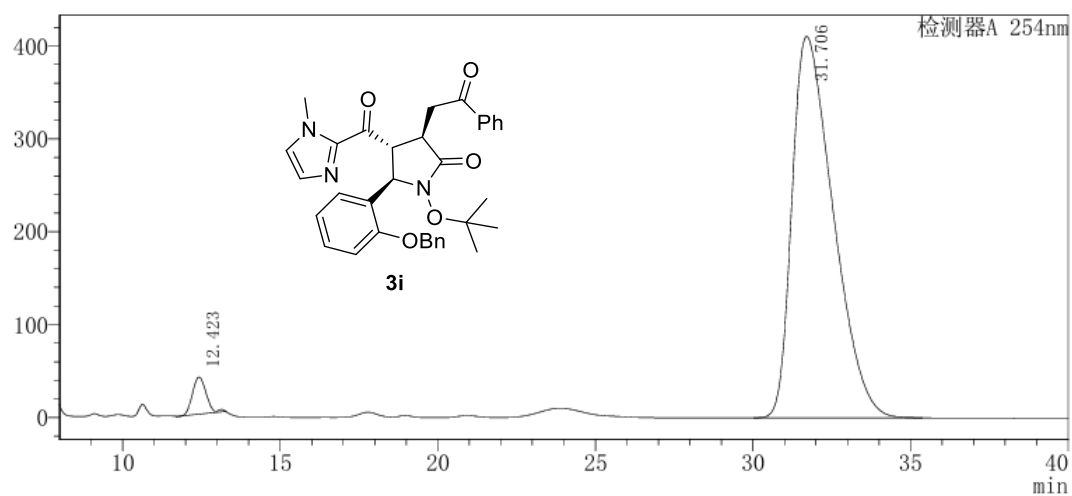

<峰表>

检测器A 254nm

| 峰号 | 保留时间   | 面积       | 高度     | 面积%     |
|----|--------|----------|--------|---------|
| 1  | 12.423 | 1206043  | 39844  | 3.132   |
| 2  | 31.706 | 37295663 | 410876 | 96.868  |
| 总计 |        | 38501707 | 450720 | 100.000 |

**Figure S37.** HPLC traces of racemic (reference) and chiral **3i**. Area integration = 96.9:3.1 (94% ee).

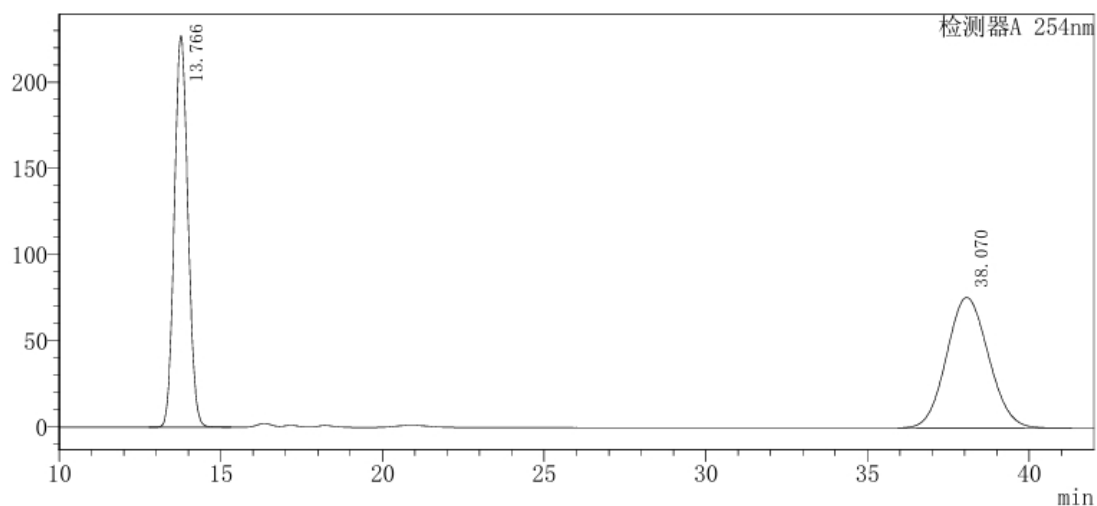

<峰表>

检测器A 254nm

| 峰号 | 保留时间   | 面积       | 高度     | 面积%     |
|----|--------|----------|--------|---------|
| 1  | 13.766 | 6642538  | 227011 | 49.377  |
| 2  | 38.070 | 6810067  | 75667  | 50.623  |
| 总计 |        | 13452605 | 302678 | 100.000 |

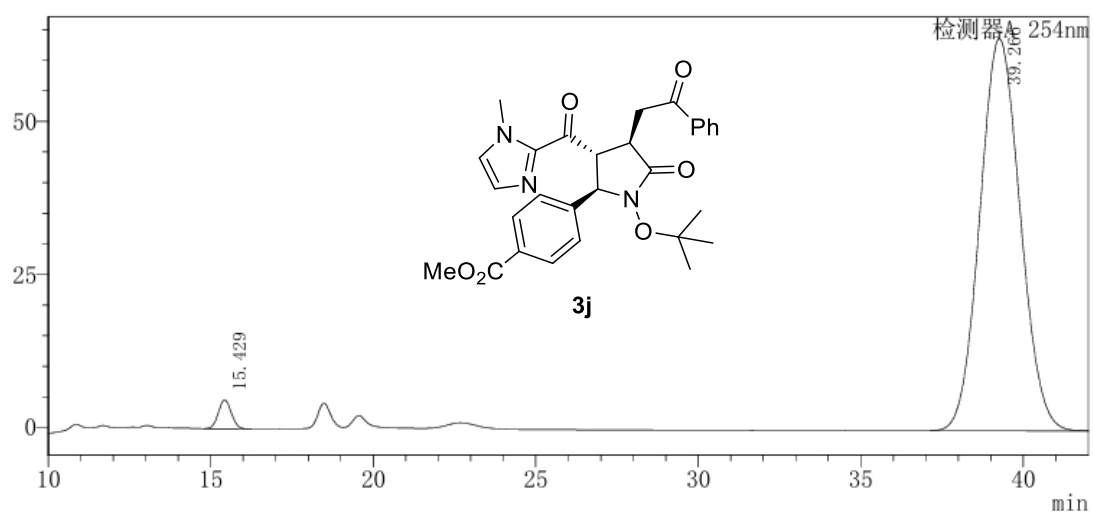

<峰表>

检测器A 254nm

| 峰号 | 保留时间   | 面积      | 高度    | 面积%     |
|----|--------|---------|-------|---------|
| 1  | 15.429 | 130857  | 4699  | 2.309   |
| 2  | 39.266 | 5537514 | 64056 | 97.691  |
| 总计 |        | 5668371 | 68755 | 100.000 |

**Figure S38.** HPLC traces of racemic (reference) and chiral **3j**. Area integration = 97.7:2.3 (95% ee).

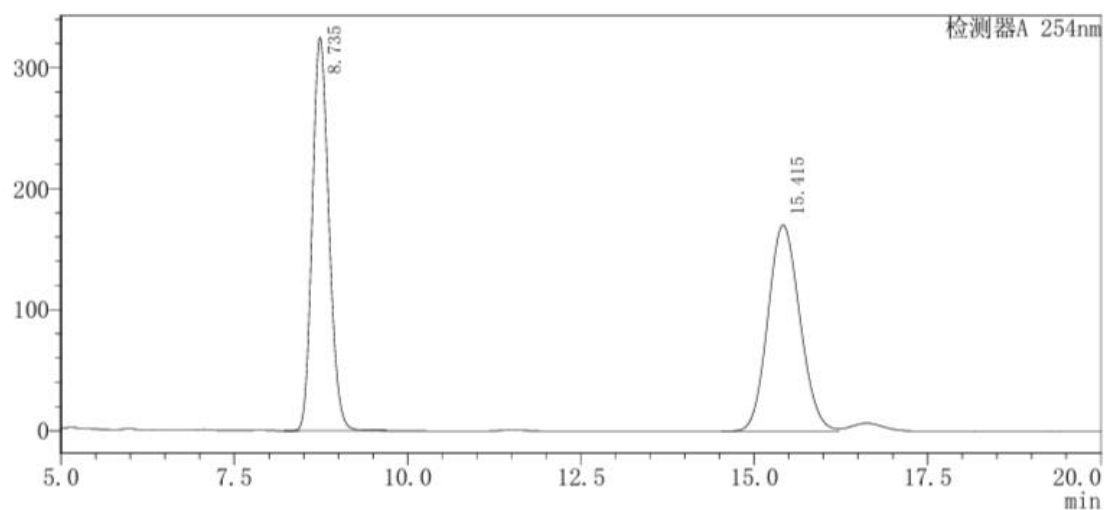

<峰表>

检测器A 254nm

| 峰号 | 保留时间   | 面积       | 高度     | 面积%     |
|----|--------|----------|--------|---------|
| 1  | 8.735  | 5435124  | 325148 | 49.775  |
| 2  | 15.415 | 5484237  | 170478 | 50.225  |
| 总计 |        | 10919361 | 495626 | 100.000 |

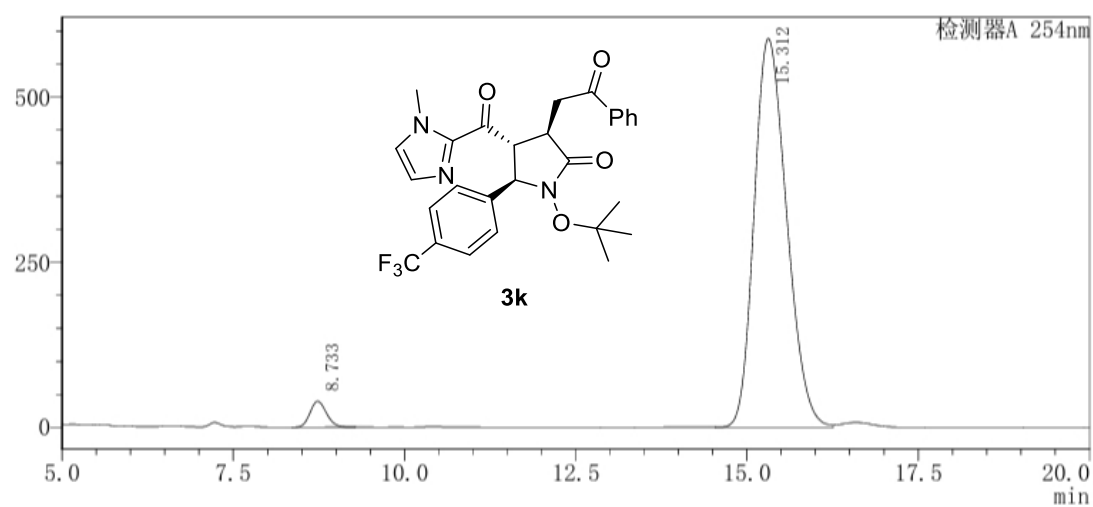

<峰表>

检测器A 254nm

| 峰号 | 保留时间   | 面积       | 高度     | 面积%     |
|----|--------|----------|--------|---------|
| 1  | 8.733  | 656708   | 39378  | 3.264   |
| 2  | 15.312 | 19461717 | 588647 | 96.736  |
| 总计 |        | 20118426 | 628025 | 100.000 |

**Figure S39.** HPLC traces of racemic (reference) and chiral **3k**. Area integration = 96.7:3.3 (93% ee).

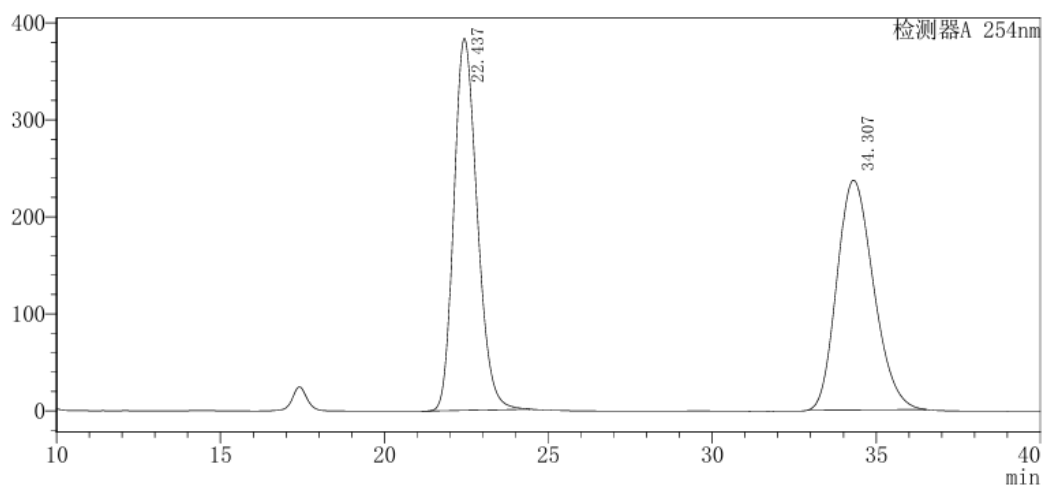

<峰表>

检测器A 254nm

| 峰号 | 保留时间   | 面积       | 高度     | 面积%     |
|----|--------|----------|--------|---------|
| 1  | 22.437 | 18937409 | 383187 | 50.814  |
| 2  | 34.307 | 18330893 | 236724 | 49.186  |
| 总计 |        | 37268302 | 619912 | 100.000 |

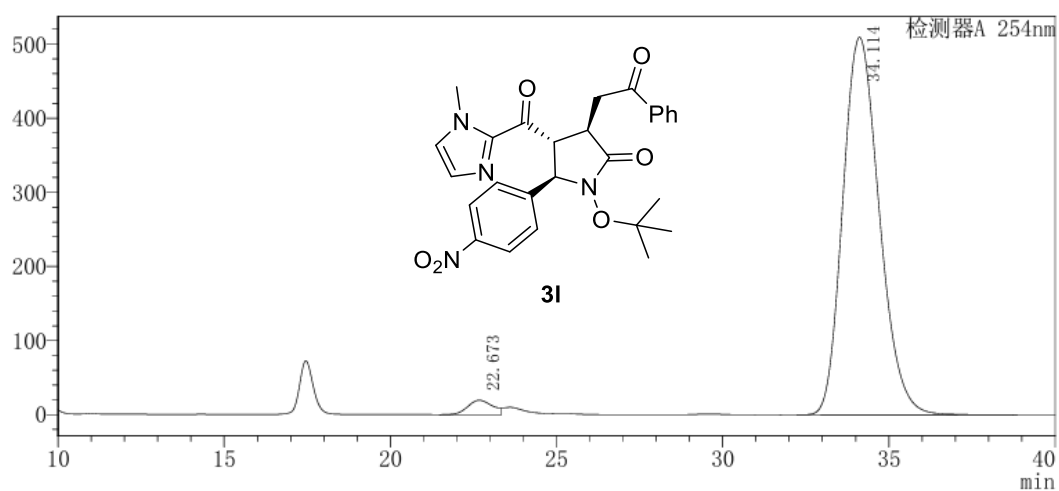

<峰表>

检测器A 254nm

| 峰号 | 保留时间   | 面积       | 高度     | 面积%     |
|----|--------|----------|--------|---------|
| 1  | 22.673 | 1007612  | 19376  | 2.533   |
| 2  | 34.114 | 38771400 | 509319 | 97.467  |
| 总计 |        | 39779012 | 528695 | 100.000 |

**Figure S40.** HPLC traces of racemic (reference) and chiral **3I**. Area integration = 97.5:2.5 (95% ee).

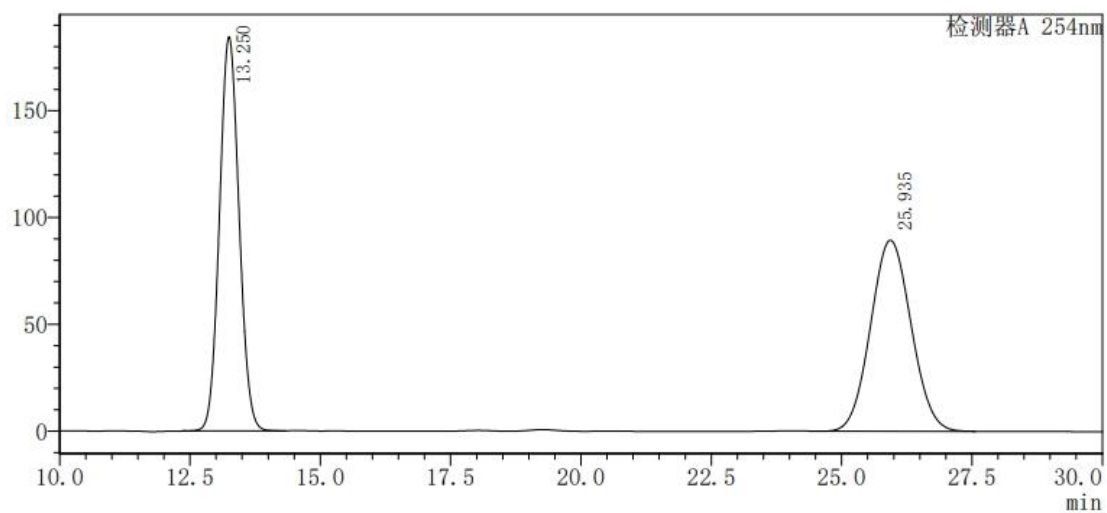

<峰表>

检测器A 254nm

| 峰号 | 保留时间   | 面积      | 高度     | 面积%     |
|----|--------|---------|--------|---------|
| 1  | 13.250 | 4829362 | 184605 | 50.017  |
| 2  | 25.935 | 4826083 | 89409  | 49.983  |
| 总计 |        | 9655445 | 274014 | 100.000 |

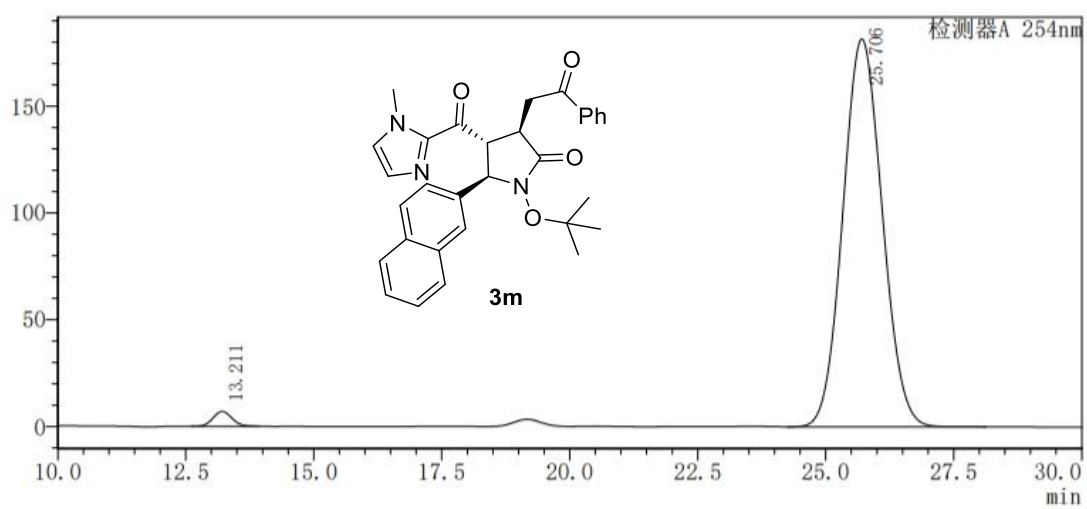

<峰表>

检测器A 254nm

| 峰号 | 保留时间   | 面积      | 高度     | 面积%     |
|----|--------|---------|--------|---------|
| 1  | 13.211 | 178807  | 6955   | 1.809   |
| 2  | 25.706 | 9703693 | 181684 | 98.191  |
| 总计 |        | 9882501 | 188640 | 100.000 |

**Figure S41.** HPLC traces of racemic (reference) and chiral **3m**. Area integration = 98.2:1.8 (96% ee).

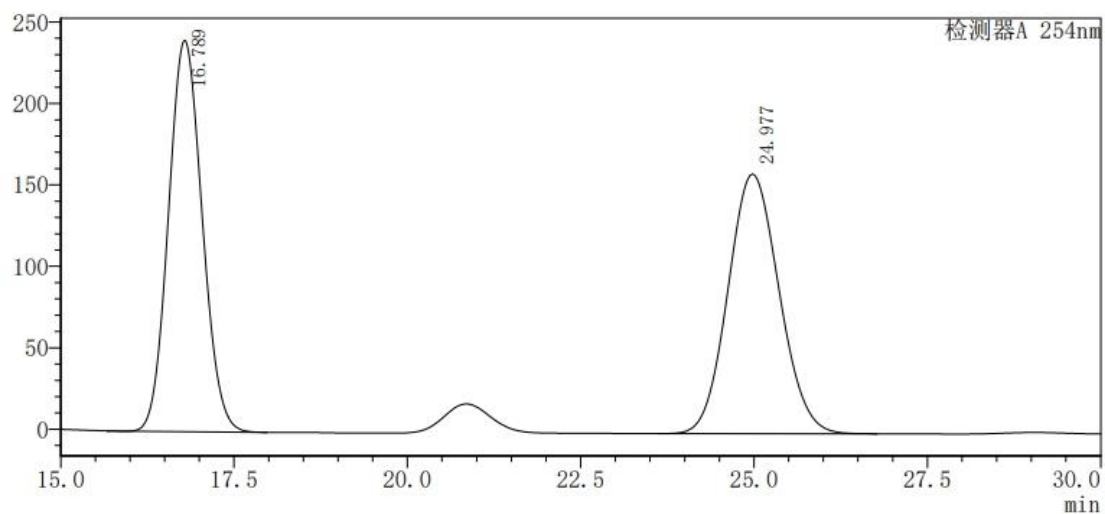

<峰表>

检测器A 254nm

| 峰号 | 保留时间   | 面积       | 高度     | 面积%     |
|----|--------|----------|--------|---------|
| 1  | 16.789 | 8135826  | 240259 | 49.851  |
| 2  | 24.977 | 8184548  | 159326 | 50.149  |
| 总计 |        | 16320374 | 399585 | 100.000 |

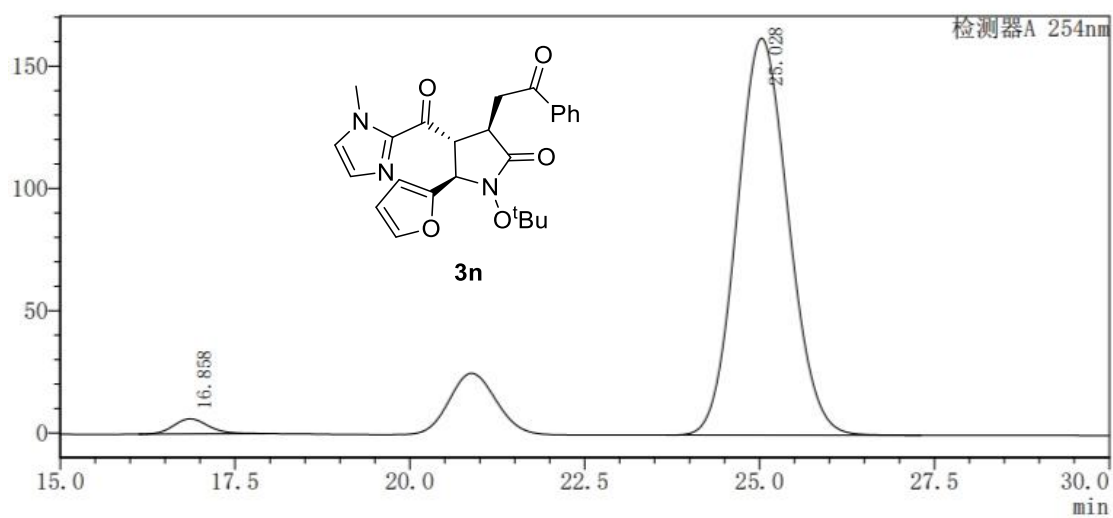

<峰表>

检测器A 254nm

| 峰号 | 保留时间   | 面积      | 高度     | 面积%     |
|----|--------|---------|--------|---------|
| 1  | 16.858 | 214564  | 6170   | 2.512   |
| 2  | 25.028 | 8325903 | 162204 | 97.488  |
| 总计 |        | 8540467 | 168374 | 100.000 |

**Figure S42.** HPLC traces of racemic (reference) and chiral **3n**. Area integration = 2.5:97.5 (95% ee).

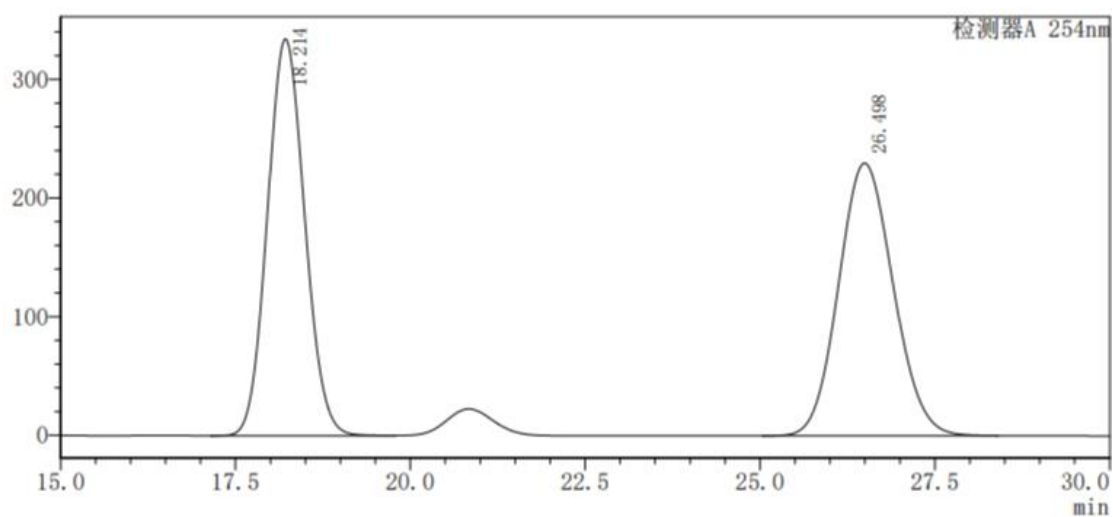

<峰表>

检测器A 254nm

| 峰号 | 保留时间   | 面积       | 高度     | 面积%     |
|----|--------|----------|--------|---------|
| 1  | 18.214 | 12398747 | 334421 | 49.811  |
| 2  | 26.498 | 12492770 | 229704 | 50.189  |
| 总计 |        | 24891518 | 564125 | 100.000 |

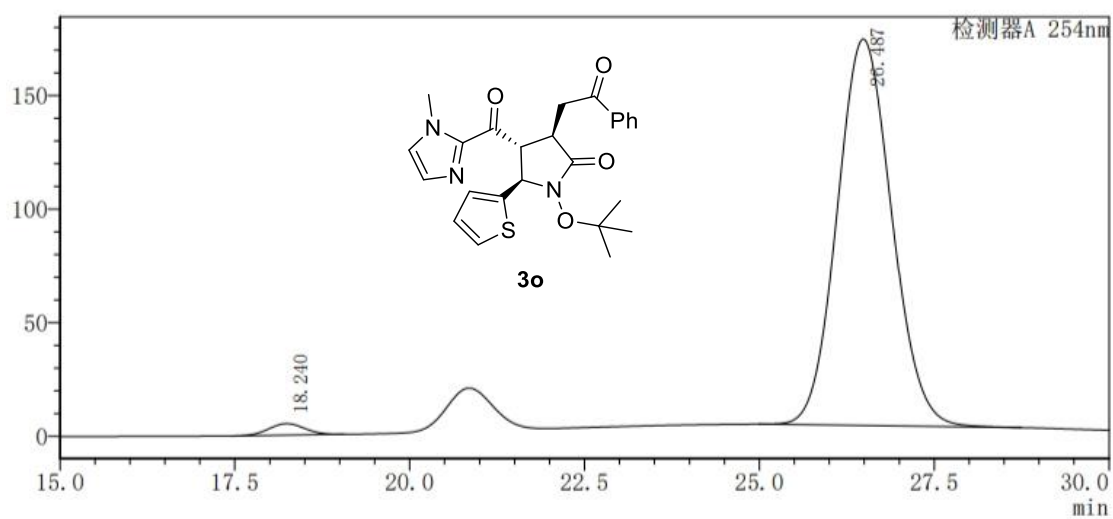

<峰表>

检测器A 254nm

| 峰号 | 保留时间   | 面积      | 高度     | 面积%     |
|----|--------|---------|--------|---------|
| 1  | 18.240 | 181918  | 5092   | 1.931   |
| 2  | 26.487 | 9241004 | 170202 | 98.069  |
| 总计 |        | 9422922 | 175293 | 100.000 |

**Figure S43.** HPLC traces of racemic (reference) and chiral **30**. Area integration =98.0:2.0 (96% ee).

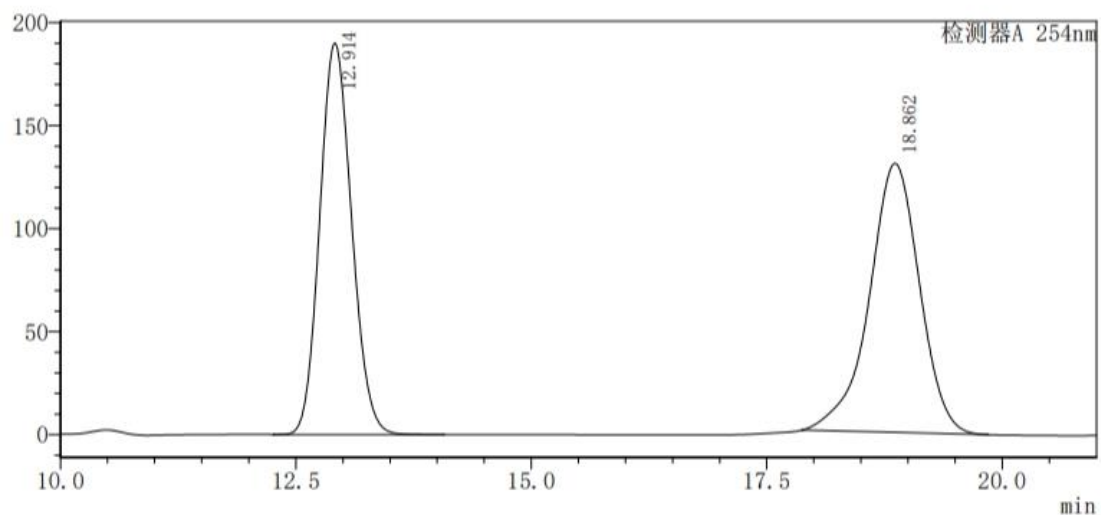

<峰表>

检测器A 254nm

| 峰号 | 保留时间   | 面积      | 高度     | 面积%     |
|----|--------|---------|--------|---------|
| 1  | 12.914 | 4476348 | 189967 | 47.961  |
| 2  | 18.862 | 4856922 | 130539 | 52.039  |
| 总计 |        | 9333270 | 320506 | 100.000 |

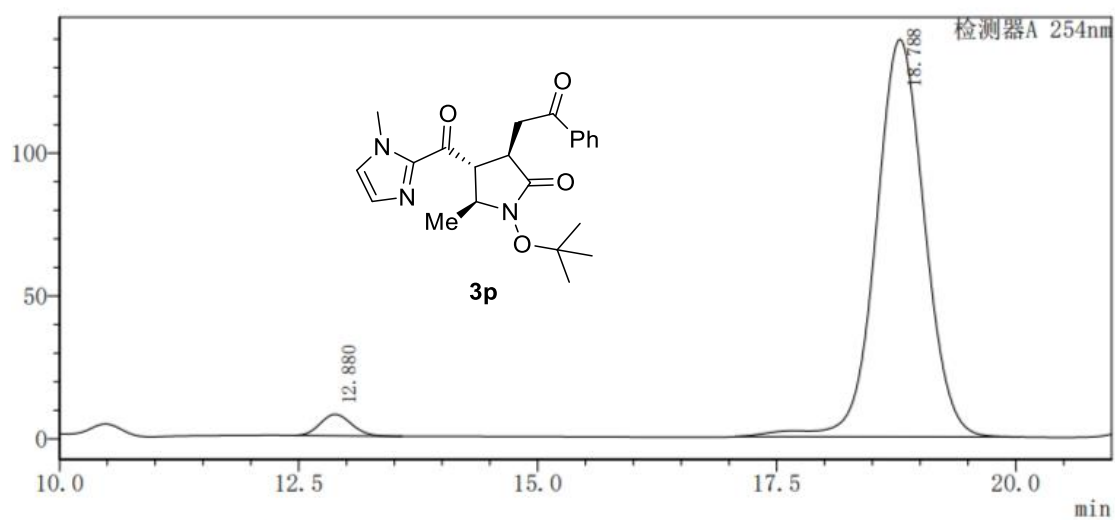

<峰表>

检测器A 254nm

| 峰号 | 保留时间   | 面积      | 高度     | 面积%     |
|----|--------|---------|--------|---------|
| 1  | 12.880 | 170250  | 7488   | 3.339   |
| 2  | 18.788 | 4929137 | 139089 | 96.661  |
| 总计 |        | 5099387 | 146577 | 100.000 |

**Figure S44.** HPLC traces of racemic (reference) and chiral **3p**. Area integration =96.7:3.3 (93% ee).



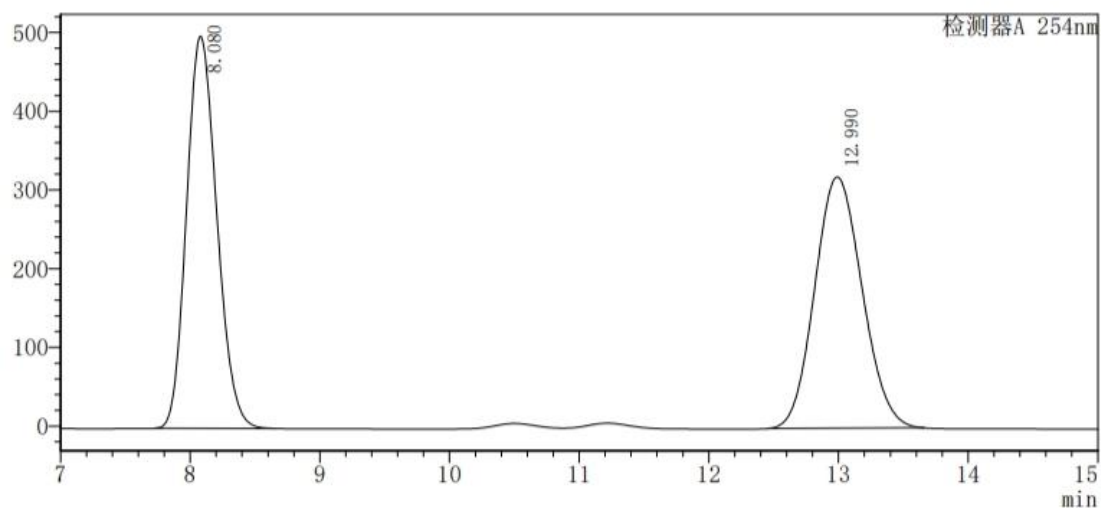

<峰表>

检测器A 254nm

| 峰号 | 保留时间   | 面积       | 高度     | 面积%     |
|----|--------|----------|--------|---------|
| 1  | 8.080  | 8104440  | 498145 | 49.958  |
| 2  | 12.990 | 8118215  | 319272 | 50.042  |
| 总计 |        | 16222655 | 817416 | 100.000 |

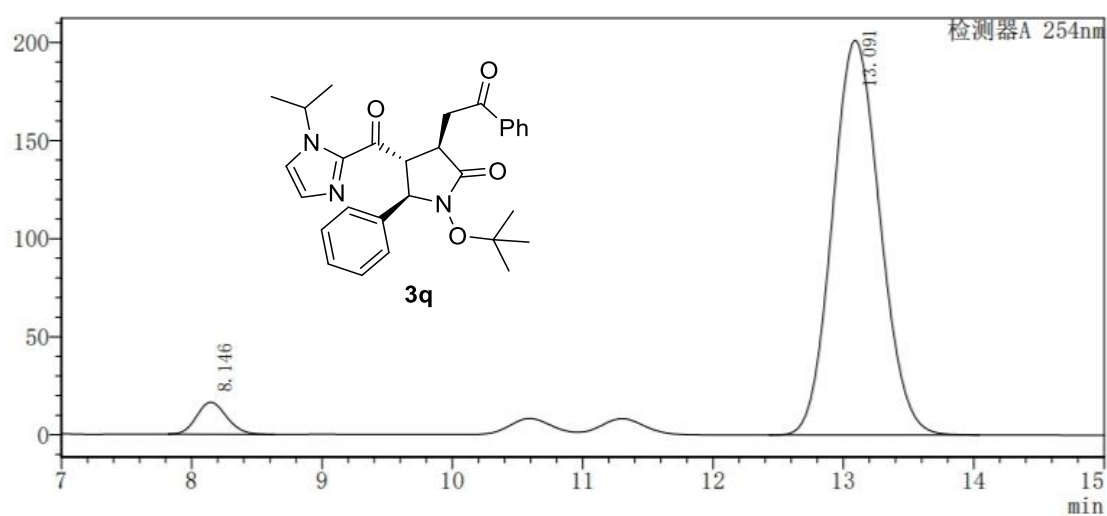

<峰表>

检测器A 254nm

| 峰号 | 保留时间   | 面积      | 高度     | 面积%     |
|----|--------|---------|--------|---------|
| 1  | 8.146  | 262026  | 16320  | 4.872   |
| 2  | 13.091 | 5116534 | 201184 | 95.128  |
| 总计 |        | 5378560 | 217504 | 100.000 |

**Figure S45.** HPLC traces of racemic (reference) and chiral **3q**. Area integration = 95.1:4.9 (90% ee).

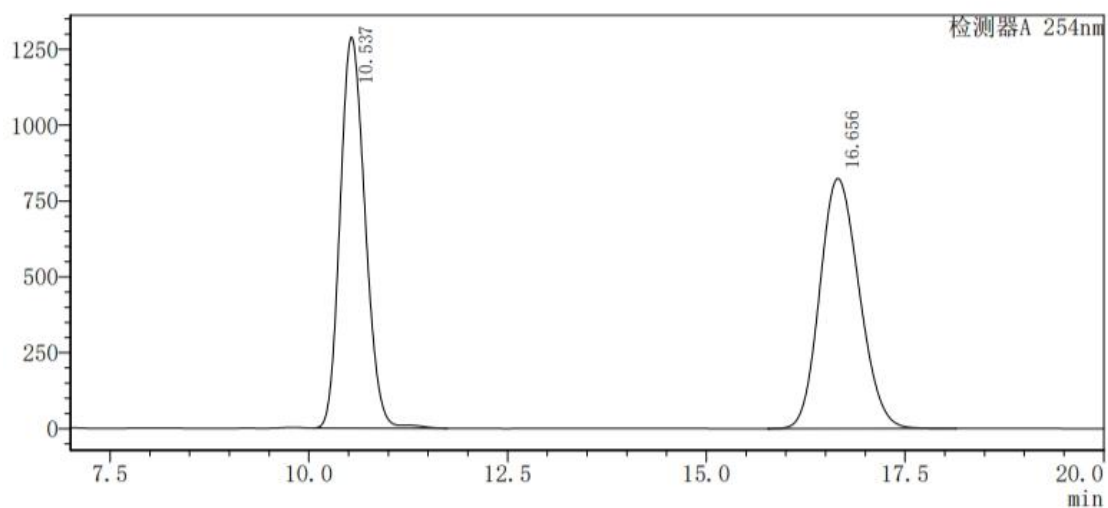

<峰表>

检测器A 254nm

| 峰号 | 保留时间   | 面积       | 高度      | 面积%     |
|----|--------|----------|---------|---------|
| 1  | 10.537 | 28171217 | 1288945 | 49.736  |
| 2  | 16.656 | 28470233 | 824426  | 50.264  |
| 总计 |        | 56641450 | 2113371 | 100.000 |

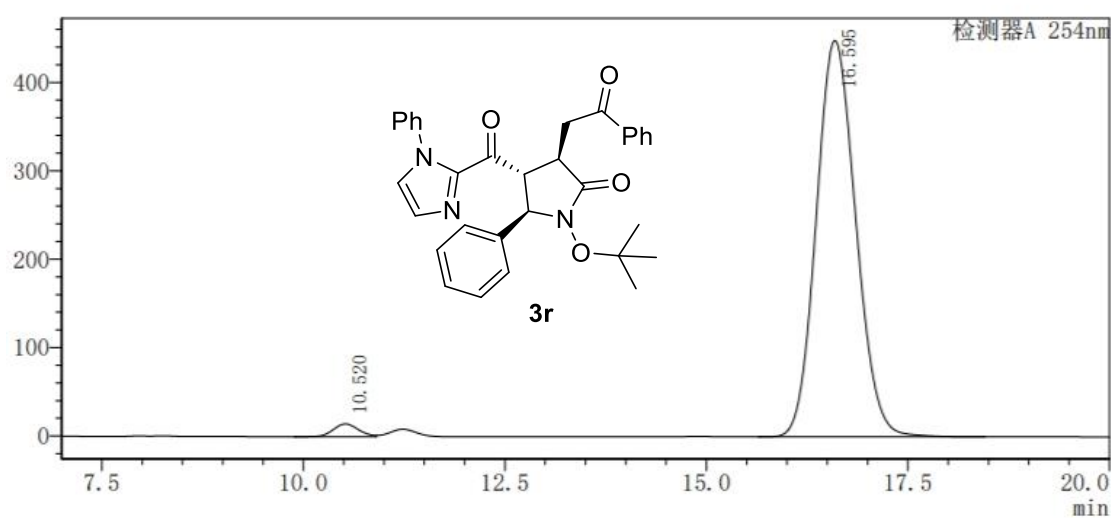

<峰表>

检测器A 254nm

| 峰号 | 保留时间   | 面积       | 高度     | 面积%     |
|----|--------|----------|--------|---------|
| 1  | 10.520 | 320702   | 14551  | 2.054   |
| 2  | 16.595 | 15295362 | 448474 | 97.946  |
| 总计 |        | 15616064 | 463024 | 100.000 |

**Figure S46.** HPLC traces of racemic (reference) and chiral **3r**. Area integration = 97.9:2.1 (96% ee).

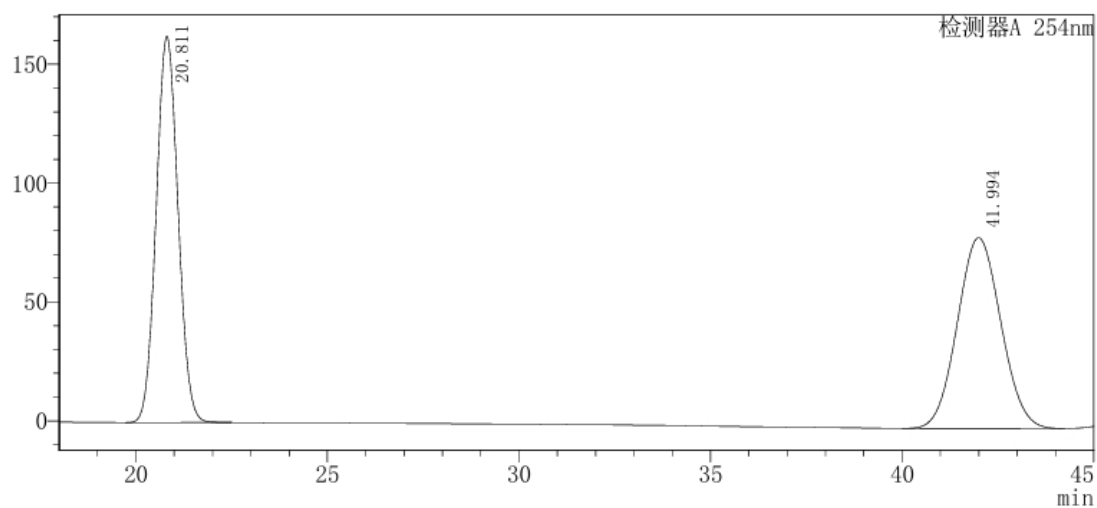

<峰表>

检测器A 254nm

| 峰号 | 保留时间   | 面积       | 高度     | 面积%     |
|----|--------|----------|--------|---------|
| 1  | 20.811 | 6439613  | 162397 | 50.388  |
| 2  | 41.994 | 6340559  | 80255  | 49.612  |
| 总计 |        | 12780171 | 242652 | 100.000 |

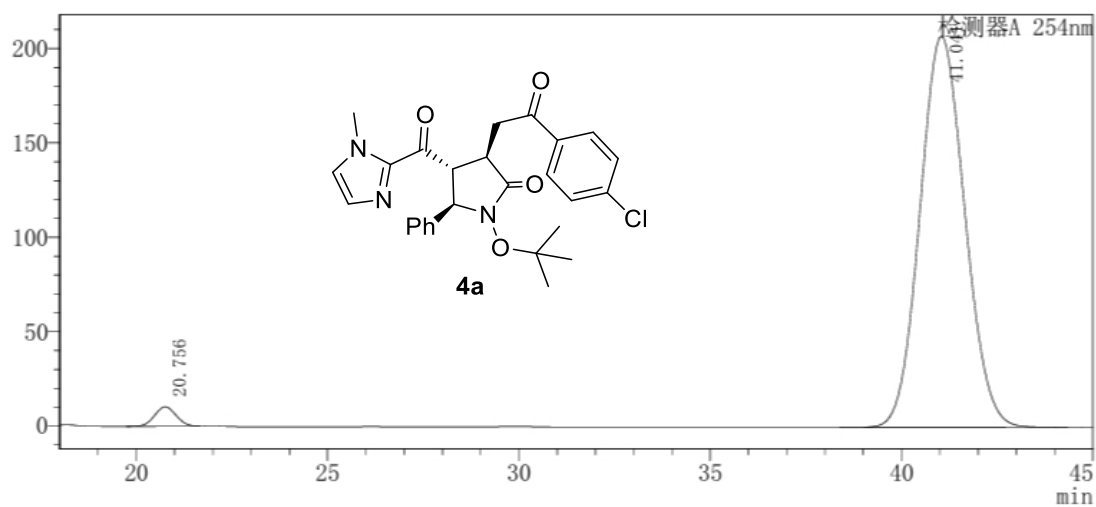

<峰表>

检测器A 254nm

| 峰号 | 保留时间   | 面积       | 高度     | 面积%     |
|----|--------|----------|--------|---------|
| 1  | 20.756 | 403937   | 10328  | 2.341   |
| 2  | 41.041 | 16851098 | 207089 | 97.659  |
| 总计 |        | 17255035 | 217417 | 100.000 |

**Figure S47.** HPLC traces of racemic (reference) and chiral **4a**. Area integration = 2.3:97.7 (95% ee).

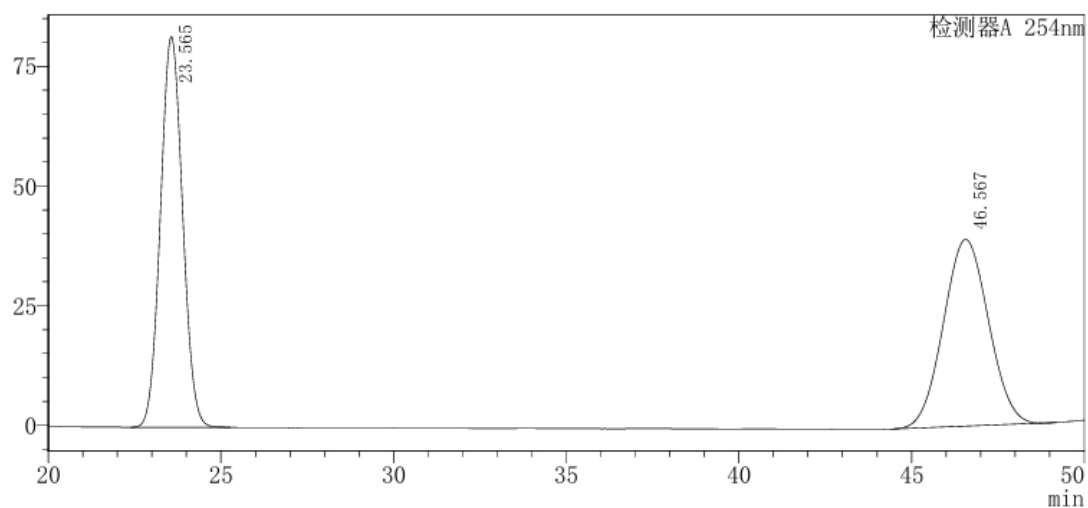

<峰表>

检测器A 254nm

| 峰号 | 保留时间   | 面积      | 高度     | 面积%     |
|----|--------|---------|--------|---------|
| 1  | 23.565 | 3646745 | 81673  | 50.700  |
| 2  | 46.567 | 3545979 | 39025  | 49.300  |
| 总计 |        | 7192724 | 120698 | 100.000 |

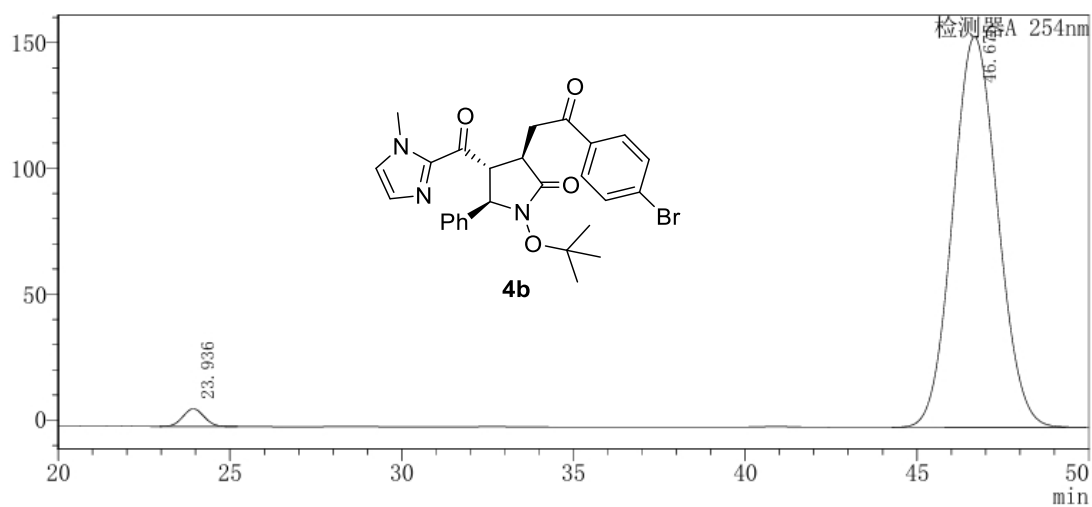

<峰表>

检测器A 254nm

| 峰号 | 保留时间   | 面积       | 高度     | 面积%     |
|----|--------|----------|--------|---------|
| 1  | 23.936 | 303535   | 7027   | 2.097   |
| 2  | 46.675 | 14168759 | 155138 | 97.903  |
| 总计 |        | 14472295 | 162166 | 100.000 |

**Figure S48.** HPLC traces of racemic (reference) and chiral **4b**. Area integration = 97.9: 2.1 (96% ee).

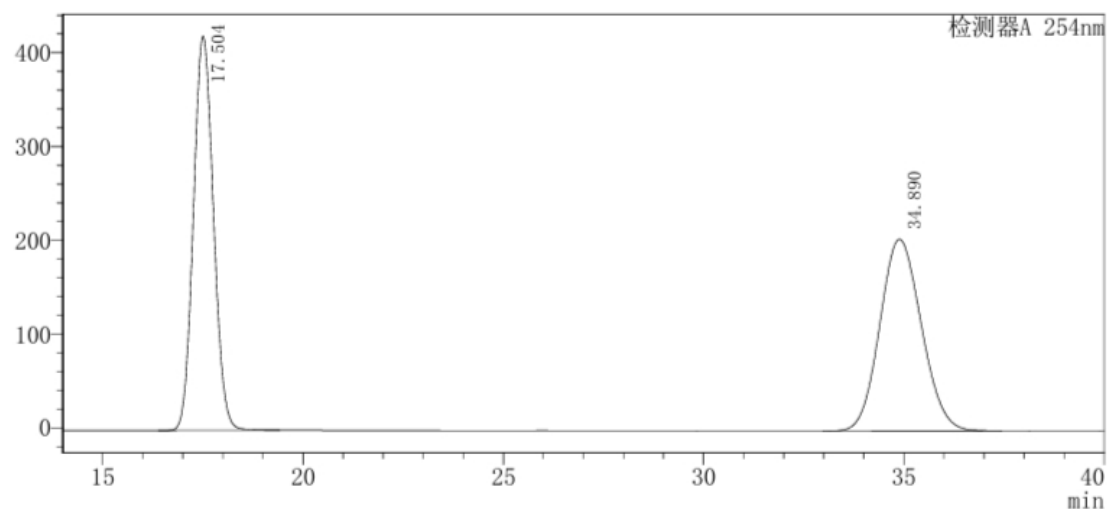

〈峰表〉

检测器A 254nm

| 峰号 | 保留时间   | 面积       | 高度     | 面积%     |
|----|--------|----------|--------|---------|
| 1  | 17.504 | 14597665 | 419769 | 49.824  |
| 2  | 34.890 | 14701037 | 204177 | 50.176  |
| 总计 |        | 29298702 | 623946 | 100.000 |

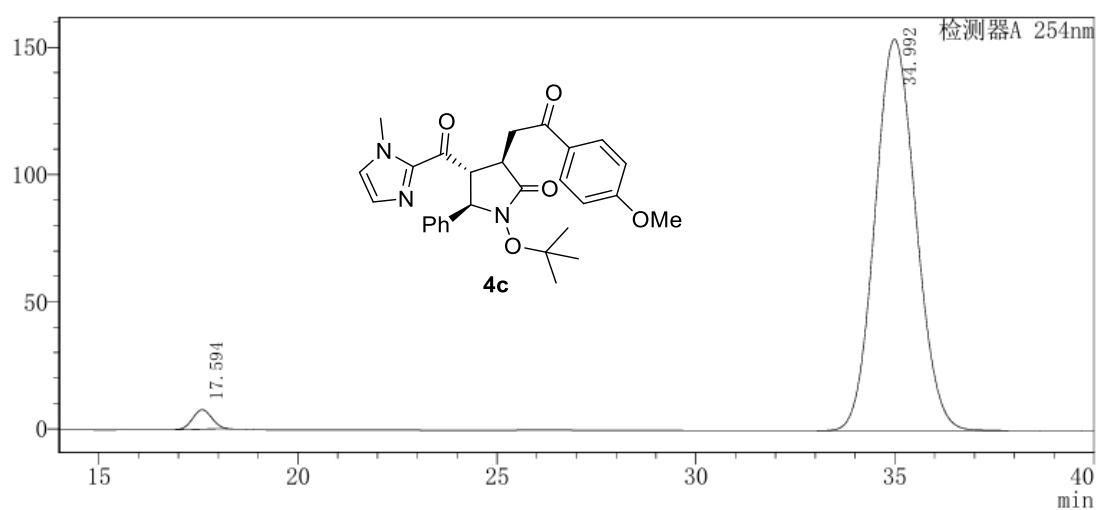

〈峰表〉

检测器A 254nm

| 峰号 | 保留时间   | 面积       | 高度     | 面积%     |
|----|--------|----------|--------|---------|
| 1  | 17.594 | 250943   | 7594   | 2.234   |
| 2  | 34.992 | 10981528 | 153901 | 97.766  |
| 总计 |        | 11232471 | 161495 | 100.000 |

**Figure S49.** HPLC traces of racemic (reference) and chiral **4c**. Area integration = 97.8:2.2 (96% ee).

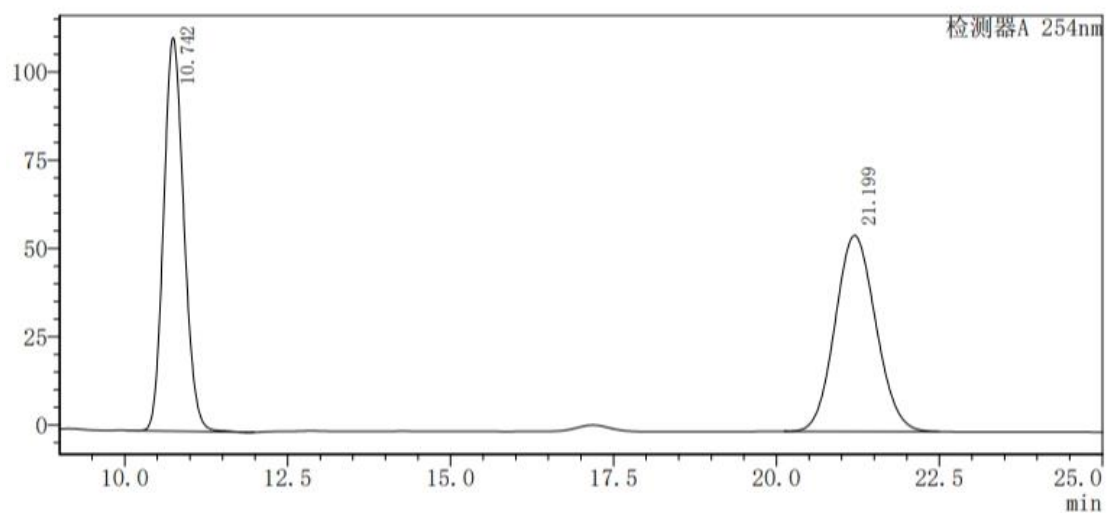

<峰表>

检测器A 254nm

| 峰号 | 保留时间   | 面积      | 高度     | 面积%     |
|----|--------|---------|--------|---------|
| 1  | 10.742 | 2406088 | 111483 | 49.876  |
| 2  | 21.199 | 2418013 | 55538  | 50.124  |
| 总计 |        | 4824102 | 167021 | 100.000 |

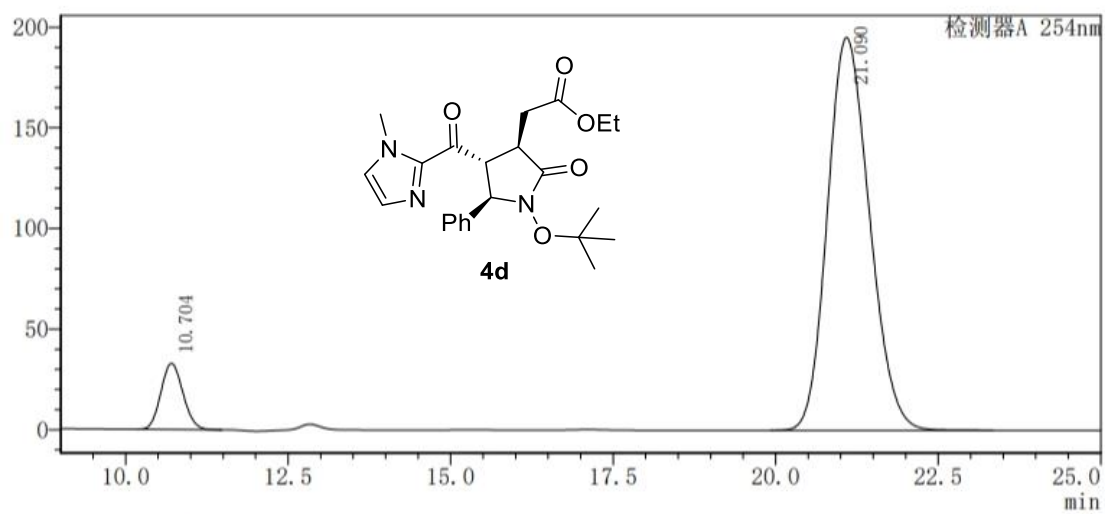

<峰表>

检测器A 254nm

| 峰号 | 保留时间   | 面积      | 高度     | 面积%     |
|----|--------|---------|--------|---------|
| 1  | 10.704 | 776654  | 32848  | 8.124   |
| 2  | 21.090 | 8783532 | 195197 | 91.876  |
| 总计 |        | 9560186 | 228045 | 100.000 |

**Figure S50.** HPLC traces of racemic (reference) and chiral **4d**. Area integration =8.1:91.9 (84% ee).

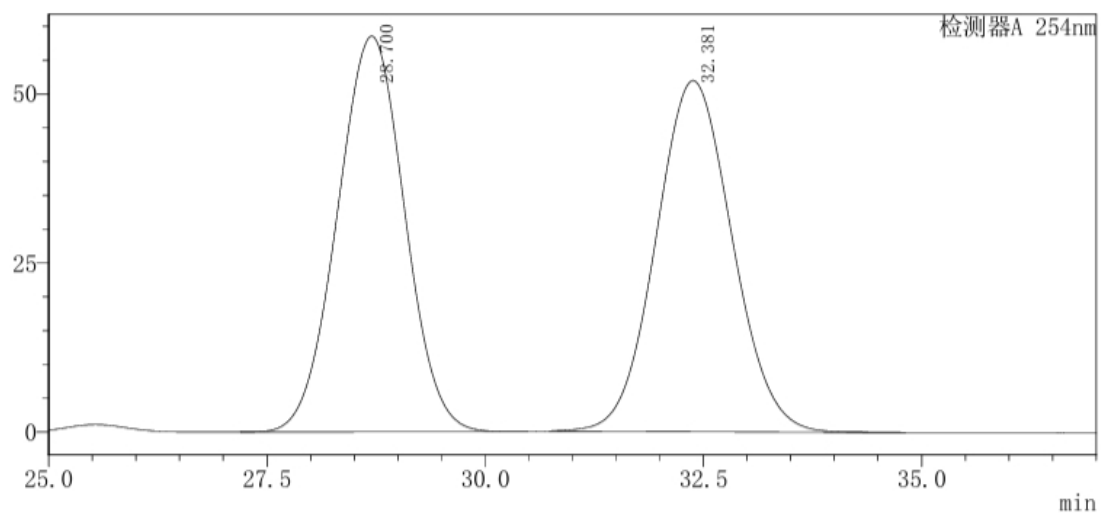

<峰表>

检测器A 254nm

| 峰号 | 保留时间   | 面积      | 高度     | 面积%     |
|----|--------|---------|--------|---------|
| 1  | 28.700 | 3146508 | 58557  | 49.920  |
| 2  | 32.381 | 3156594 | 51926  | 50.080  |
| 总计 |        | 6303102 | 110482 | 100.000 |

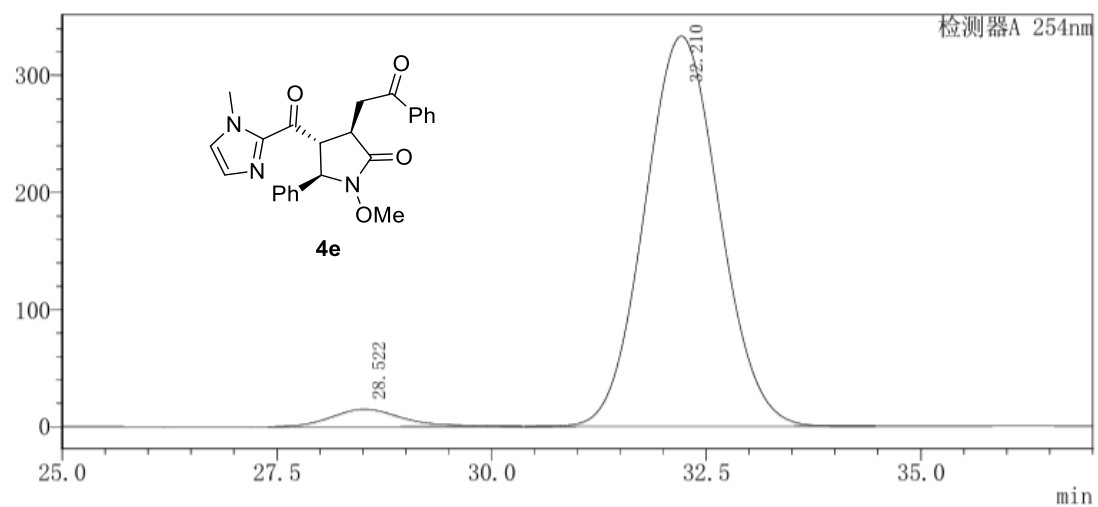

<峰表>

检测器A 254nm

| 峰号 | 保留时间   | 面积       | 高度     | 面积%     |
|----|--------|----------|--------|---------|
| 1  | 28.522 | 850127   | 14786  | 4.038   |
| 2  | 32.210 | 20205580 | 333120 | 95.962  |
| 总计 |        | 21055707 | 347906 | 100.000 |

**Figure S51.** HPLC traces of racemic (reference) and chiral **4e**. Area integration = 95.9:4.1 (92% ee).

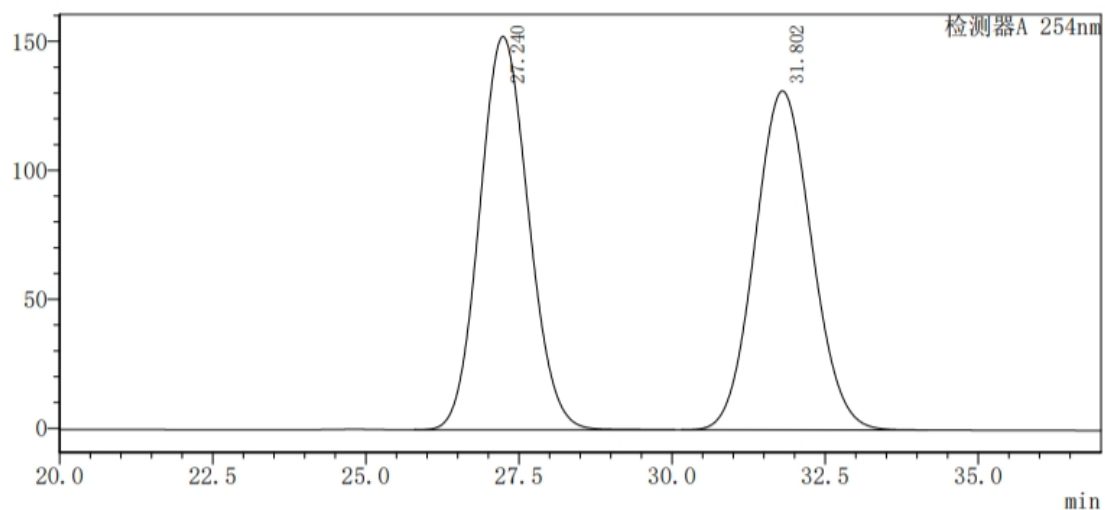

<峰表>

检测器A 254nm

| 峰号 | 保留时间   | 面积       | 高度     | 面积%     |
|----|--------|----------|--------|---------|
| 1  | 27.240 | 8485059  | 152555 | 50.037  |
| 2  | 31.802 | 8472520  | 131452 | 49.963  |
| 总计 |        | 16957579 | 284007 | 100.000 |

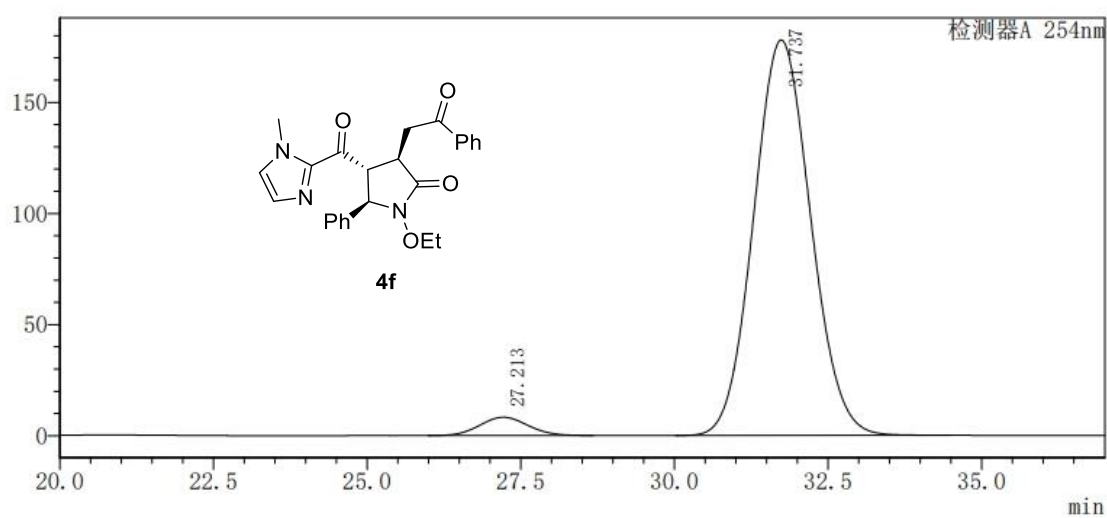

<峰表>

检测器A 254nm

| 峰号 | 保留时间   | 面积       | 高度     | 面积%     |
|----|--------|----------|--------|---------|
| 1  | 27.213 | 450057   | 8217   | 3.770   |
| 2  | 31.737 | 11489210 | 177958 | 96.230  |
| 总计 |        | 11939267 | 186175 | 100.000 |

**Figure S52.** HPLC traces of racemic (reference) and chiral **4f**. Area integration = 96.2:3.8 (92% ee).



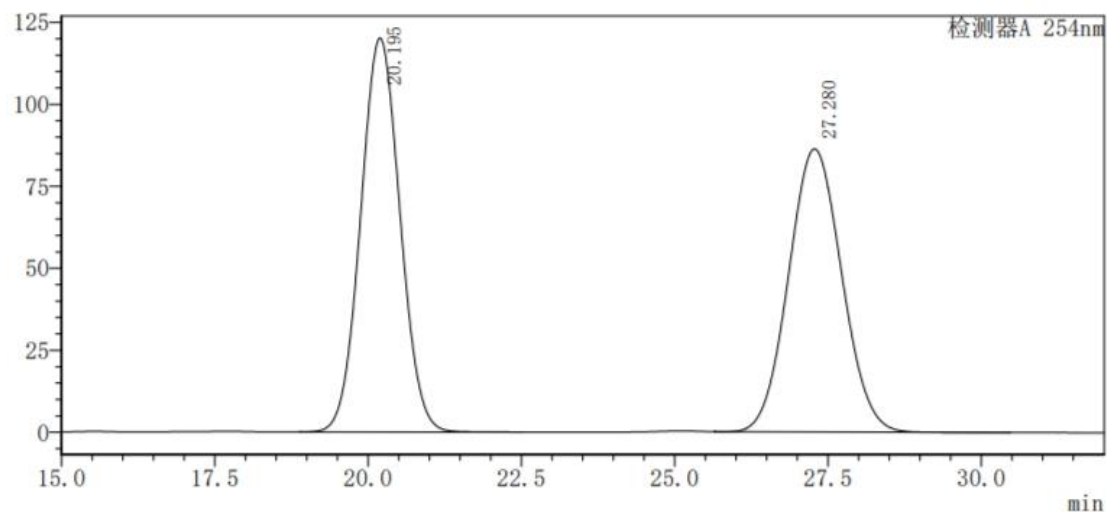

<峰表>

检测器A 254nm

| 峰号 | 保留时间   | 面积       | 高度     | 面积%     |
|----|--------|----------|--------|---------|
| 1  | 20.195 | 5373448  | 120152 | 50.735  |
| 2  | 27.280 | 5217744  | 86355  | 49.265  |
| 总计 |        | 10591192 | 206508 | 100.000 |

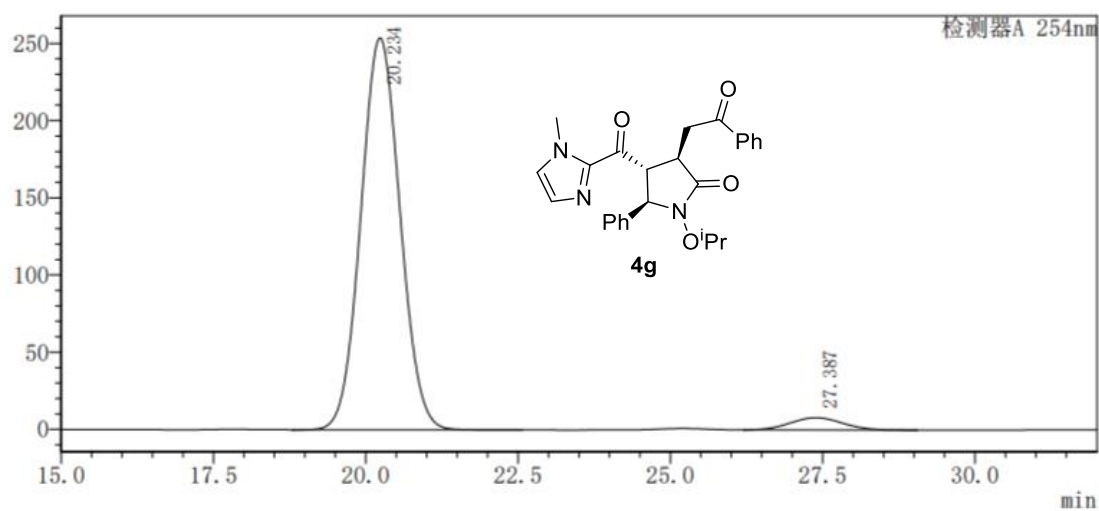

<峰表>

检测器A 254nm

| 峰号 | 保留时间   | 面积       | 高度     | 面积%     |
|----|--------|----------|--------|---------|
| 1  | 20.234 | 11371590 | 253846 | 96.007  |
| 2  | 27.387 | 472931   | 7939   | 3.993   |
| 总计 |        | 11844521 | 261785 | 100.000 |

**Figure S53.** HPLC traces of racemic (reference) and chiral **4g**. Area integration =96.0:4.0 (92% ee).

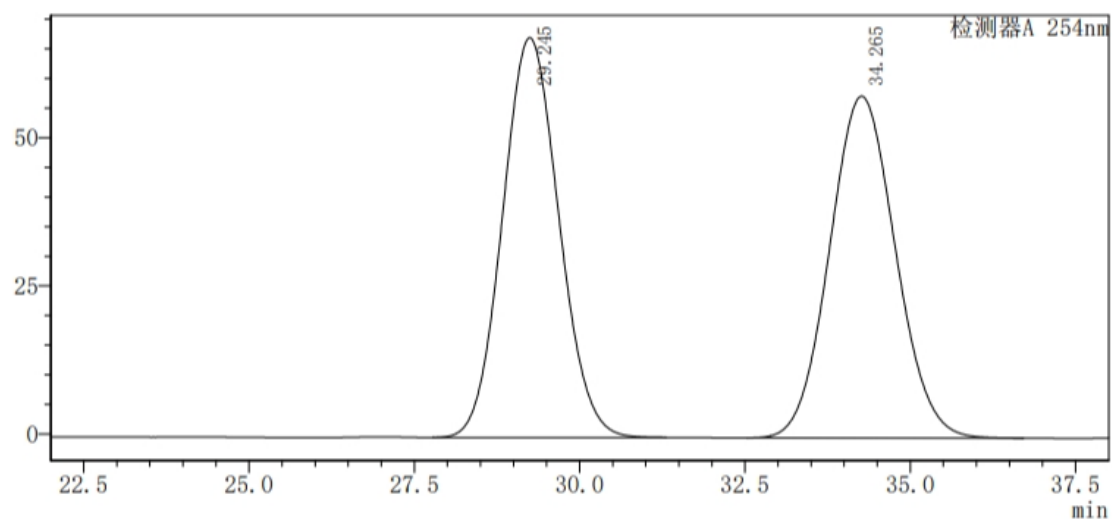

<峰表>

检测器A 254nm

| 峰号 | 保留时间   | 面积      | 高度     | 面积%     |
|----|--------|---------|--------|---------|
| 1  | 29.245 | 4003530 | 67464  | 50.008  |
| 2  | 34.265 | 4002191 | 57680  | 49.992  |
| 总计 |        | 8005722 | 125144 | 100.000 |

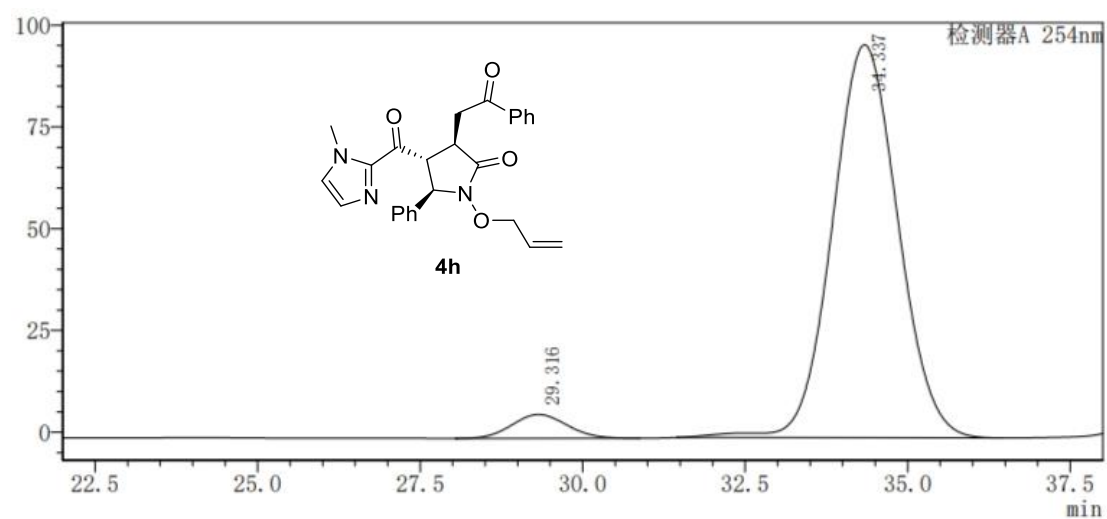

<峰表>

检测器A 254nm

| 峰号 | 保留时间   | 面积      | 高度     | 面积%     |
|----|--------|---------|--------|---------|
| 1  | 29.316 | 347372  | 5861   | 4.855   |
| 2  | 34.337 | 6807377 | 96574  | 95.145  |
| 总计 |        | 7154749 | 102435 | 100.000 |

**Figure S54.** HPLC traces of racemic (reference) and chiral **4h**. Area integration = 95.1:4.9 (90% ee).

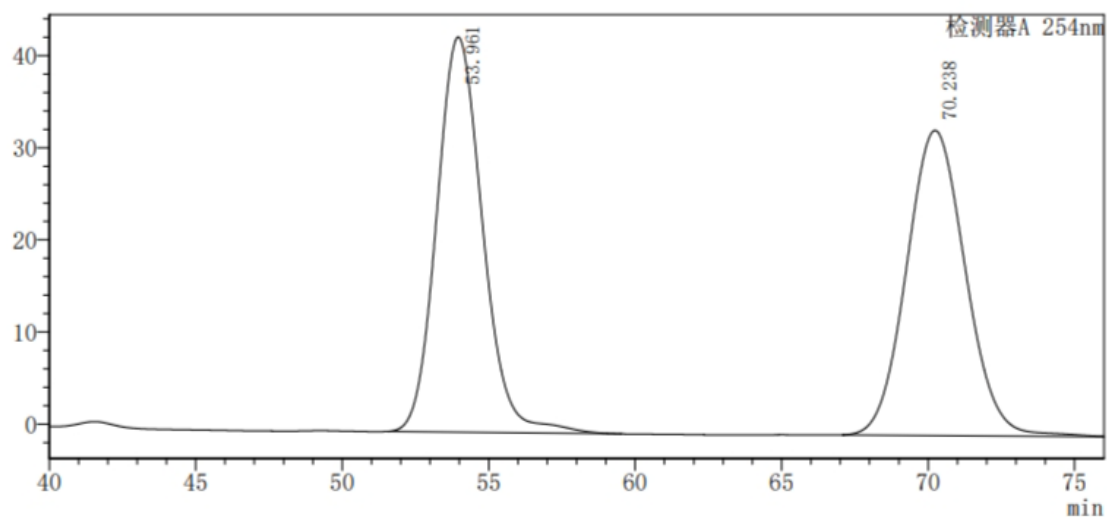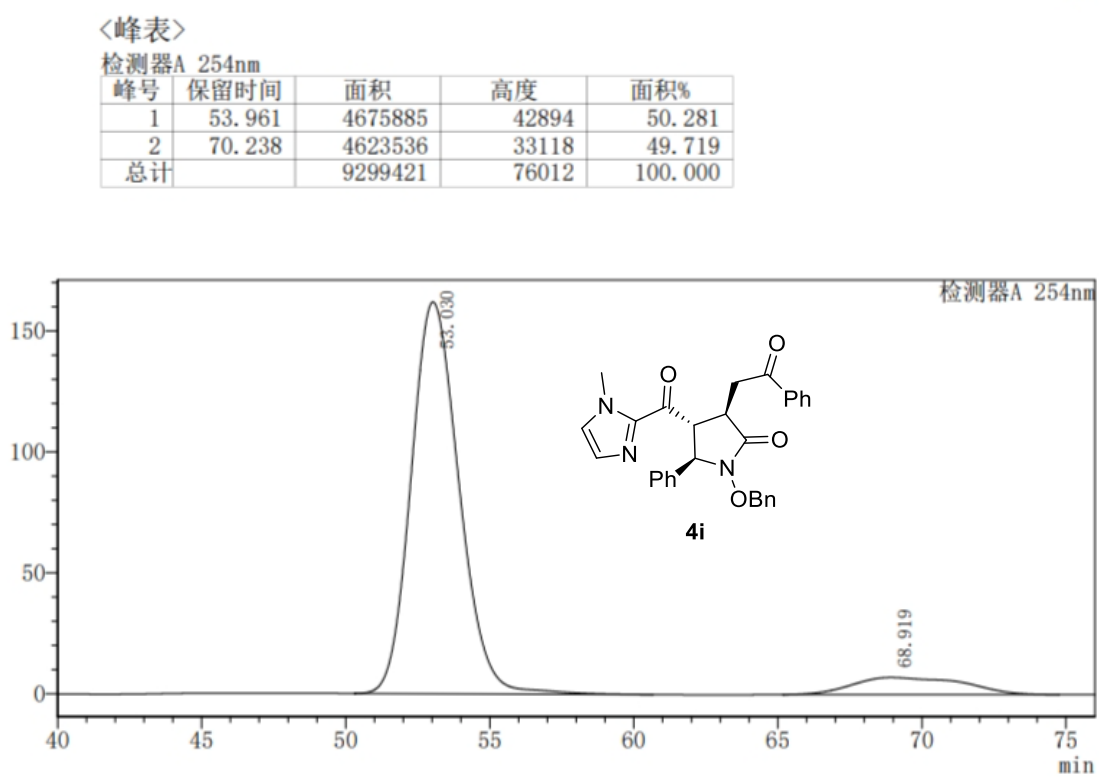

**Figure S55.** HPLC traces of racemic (reference) and chiral **4i**. Area integration = 90.8:9.2 (82% ee).

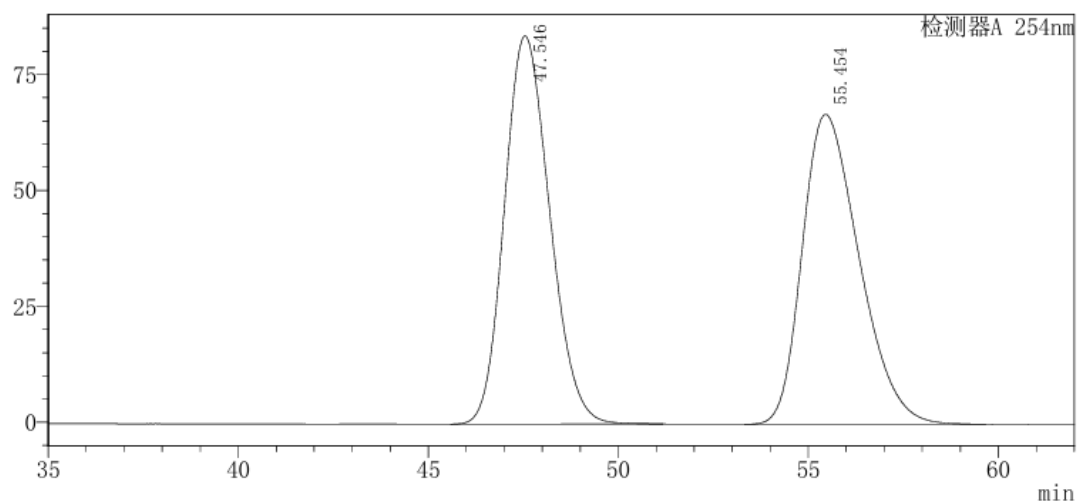

<峰表>

检测器A 254nm

| 峰号 | 保留时间   | 面积       | 高度     | 面积%     |
|----|--------|----------|--------|---------|
| 1  | 47.546 | 6953997  | 83747  | 49.979  |
| 2  | 55.454 | 6959936  | 66860  | 50.021  |
| 总计 |        | 13913932 | 150608 | 100.000 |

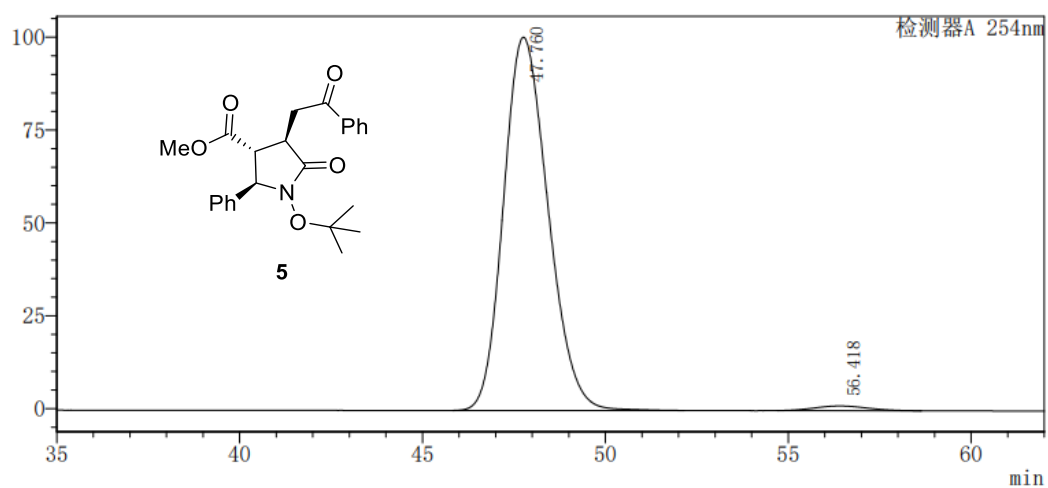

<峰表>

检测器A 254nm

| 峰号 | 保留时间   | 面积      | 高度     | 面积%     |
|----|--------|---------|--------|---------|
| 1  | 47.760 | 8519061 | 100502 | 98.537  |
| 2  | 56.418 | 126451  | 1267   | 1.463   |
| 总计 |        | 8645512 | 101769 | 100.000 |

**Figure S56.** HPLC traces of racemic (reference) and chiral **5**. Area integration = 98.5:1.5 (97% ee).

## 8. Single Crystal X-Ray Diffraction Studies

The single crystal for compound **4g** was prepared from a mixture solvent of ethyl acetate and *n*-hexane (v/v = 3:1). Diffraction data were collected on a Bruker APEX-II CCD area detector using graphite-monochromated Cu-K $\alpha$  radiation ( $\lambda$  = 1.54184 Å) at 293 K. The crystal structures were resolved by direct methods and all calculations were performed on the SHELXL-97 program package. All non-hydrogen atoms were refined anisotropically. Hydrogen atoms were added in the riding model and refined with isotropic thermal parameters. The absolute configuration of **4g** was determined as (3*R*, 4*R*, 5*R*) based on its single crystal X-ray analysis. The structure is shown in **Figure S53**. The detailed information is listed in the **Table S1**. Crystallographic data for **4g** has been deposited with the Cambridge Crystallographic Data Centre as supplementary publication number **CCDC 2407123**. These data can be obtained free of charge from The Cambridge Crystallographic Data Centre via [www.ccdc.cam.ac.uk/data\\_request/cif](http://www.ccdc.cam.ac.uk/data_request/cif).

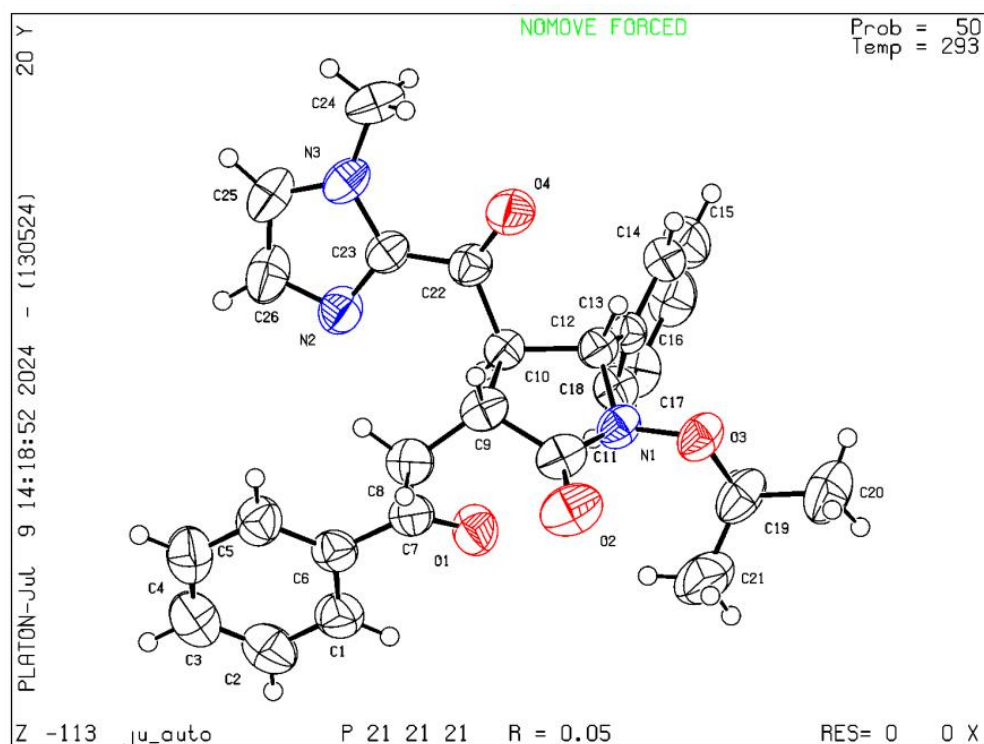

**Figure S57.** Crystal structure of **4g** to verify absolute configuration.

**Table S1.** Crystal data and structure refinement for **4g**.

|                                   |                                                               |                                         |              |
|-----------------------------------|---------------------------------------------------------------|-----------------------------------------|--------------|
| <b>Bond precision</b>             | <b>C-C = 0.0042 Å</b>                                         | <b>Z</b>                                | <b>4</b>     |
| <b>Wavelength</b>                 | 1.54184 Å                                                     | <b>μ (mm<sup>-1</sup>)</b>              | 0.701        |
|                                   | a = 10.0143(2)                                                | <b>F000</b>                             | 944.0        |
|                                   | b = 12.5104(2)                                                | <b>F000'</b>                            | 946.88       |
|                                   | c = 18.6301(3)                                                |                                         |              |
| <b>Cell</b>                       | α = 90                                                        | <b>h, k, l<sub>max</sub></b>            | 12, 15, 22   |
|                                   | β = 90                                                        |                                         |              |
|                                   | γ = 90                                                        |                                         |              |
| <b>Temperature</b>                | 293 K                                                         | <b>N<sub>ref</sub></b>                  | 4211         |
| <b>Volume</b>                     | 2334.03(7)                                                    | <b>T<sub>min</sub>, T<sub>max</sub></b> | 0.959, 0.973 |
| <b>Crystal system</b>             | orthorhombic                                                  | <b>Data completeness</b>                | 0.99         |
| <b>Space group</b>                | P 21 21 21                                                    | <b>θ (max)</b>                          | 68.013       |
| <b>Hall group</b>                 | P 2ac 2ab                                                     | <b>R(reflections)</b>                   | 0.0509(3928) |
| <b>Moiety formula</b>             | C <sub>26</sub> H <sub>27</sub> N <sub>3</sub> O <sub>4</sub> | <b>wR2(reflections)</b>                 | 0.1273(4211) |
| <b>Sum formula</b>                | C <sub>26</sub> H <sub>27</sub> N <sub>3</sub> O <sub>4</sub> | <b>S</b>                                | 1.040        |
| <b>Mr</b>                         | 445.50                                                        | <b>Npar</b>                             | 301          |
| <b>Density (g/cm<sup>3</sup>)</b> | 1.268                                                         |                                         |              |

## 9. References

- [1] Wang, C.; Chen, L.-A.; Huo, H.; Shen, X.; Harms, K.; Gong, L.; Meggers, E. *Chem. Sci.* **2015**, *6*, 1094-1100.
- [2] Gong, J.; Li, S.-W.; Saira, Q.; Kang, Q. *Eur. J. Org. Chem.* **2017**, *25*, 3584-3593.
- [3] Lin, S.-X.; Sun, G.-J.; Kang, Q. *Chem. Commun.* **2017**, *53*, 7665-7668.
- [4] Ma, J.; Shen, X.; Harms, K.; Meggers, E. *Dalton Trans.*, **2016**, *45*, 8320-8323.
- [5] Huo, H.; Fu, C.; Harms, K.; Meggers, E. *J. Am. Chem. Soc.* **2014**, *136*, 2990-2993.
- [6] Xie, L.; Sun, L.; Wu, P.; Wang, Z.; Zhao, C.; Wu, L.; Li, X.; Gao, Z.; Liu, W.; Nie, S. *Org. Biomol. Chem.* **2023**, *21*, 2295-2300.
